# Supplementary material for: The organocatalytic two-step synthesis of diversely functionalized tricyclic tetrazoles
Source: Royal Society of Chemistry journal article supplement (doi:10.1039/c0ob00272k), 2010-01-01
Supplement: c0ob00272k.pdf [file c0ob00272k.pdf]

## Supporting Information for

# The Organocatalytic Two-step Synthesis of Diversely Functionalized Tricyclic Tetrazaoles

Xiong Huang, Ping Li, Xin-Sheng Li, Dong-Cheng Xu, Jian-Wu Xie\*

Key Laboratory of the Ministry of Education for Advanced Catalysis Materials,  
Department of Chemistry and Life Science, Zhejiang Normal University,  
321004Jinhua, P. R. of China.  
E-mail: xiejw@zjnu.cn

### 1. General methods

### 2. Asymmetric Michael addition and intramolecular 1,3-dipolar cycloaddition of functionalized $\alpha,\beta$ -unsaturated ketones **2** to malononitrile

#### 1. General Methods:

Column chromatography was performed using silica gel (200-300 mesh) eluting with ethyl acetate and petroleum ether.  $^1\text{H}$  NMR and  $^{13}\text{C}$  NMR spectra were recorded on Bruker DRX 400 spectrometer at room temperature in  $\text{CDCl}_3$  as solvent. Chemical shifts for protons are reported using residual  $\text{CHCl}_3$  as internal reference ( $=7.26$  ppm). Carbon spectra were referenced to the shift of the  $^{13}\text{C}$  signal of  $\text{CDCl}_3$  ( $=77.0$  ppm). Coupling constants ( $J$ ) are given in Hz. IR spectra were recorded using a Perkin-Elmer 1600 Series FTIR. ESI-HRMS spectrometer was measured with a Finnigan LCQ<sup>DECA</sup> ion trap mass spectrometer. Optical rotations were measured at 589 nm at 25 °C in a 1 dm cell and specific rotations are given in  $10^{-1}$  deg  $\text{cm}^2$   $\text{g}^{-1}$ . Enantiomeric excess were determined by HPLC analysis (Waters-Breeze 2487, dual absorbance detector and 1525 Binary HPLC Pump) using Daicel Chiralpak AS column (4.6mm\*250mm, 5 $\mu\text{m}$ ) and Daicel Chiralpak AD column (4.6mm\*250mm,

5 $\mu$ m). Commercial grade solvents were dried and purified by standard procedures as specified in Purification of Laboratory Chemicals, 4th Ed (Armarego, W. L. F.; Perrin, D. D. Butterworth Heinemann: 1997).

## 2. Asymmetric Michael addition and intramolecular 1,3-dipolar cycloaddition of functionalized $\alpha,\beta$ -unsaturated ketones **2** to malononitrile

**General procedure:** **2a** 18.7 mg (0.1 mmol), malononitrile 13.2 mg (0.2 mmol), **1a** 6.5 mg (0.02 mol) and TFA 3.0  $\mu$ L (0.04 mol) were stirred in DCM (1 mL) at 25  $^{\circ}$ C for 96 h. and flash chromatography on silica gel (8% ethyl acetate/petroleum ether) gave **3a** as a white solid (21.5 mg, 85%). The product **3a** (0.1 mmol) was refluxed in CH<sub>3</sub>CN (1.5 mL) for 12h, then the solvent was removed and flash column chromatography (citation to Clark Still's paper) was performed (monitored by TLC, 15% ethyl acetate/petroleum ether as eluent) to give **4a** as a yellow solid (19.7 mg, 92%).

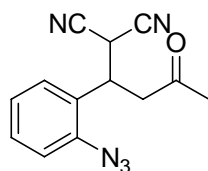

**3a**, 85% yield. pale yellow solid, m.p. 84-85  $^{\circ}$ C; <sup>1</sup>H NMR (400 MHz, CDCl<sub>3</sub>)  $\delta$  (ppm) 7.44-7.35 (m, 2H), 7.24-7.17 (m, 2H), 4.51 (d,  $J$  = 6.3Hz, 1H), 4.24-4.18 (m, 1H), 3.14 (d,  $J$  = 7.0Hz, 1H), 2.20 (s, 3H); <sup>13</sup>C NMR (100 MHz, CDCl<sub>3</sub>)  $\delta$  (ppm) 204.6, 138.2, 130.2, 128.6, 127.2, 125.5, 118.8, 111.8, 111.5, 43.9, 35.4, 30.3, 27.2; ESI-HRMS: calcd. for C<sub>13</sub>H<sub>11</sub>N<sub>5</sub>O+H 254.10376, found 254.10364; 96% ee; The enantiomeric ratio was determined by HPLC on Chiralpak AD column (30% 2-propanol/hexane, 1.0 mL/min, detection at 254 nm),  $t_{\text{minor}}$  = 5.06 min,  $t_{\text{major}}$  = 5.64 min.

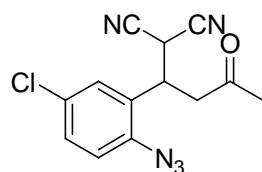

**3b**, 72% yield. pale yellow solid, m.p. 91-92  $^{\circ}$ C; <sup>1</sup>H NMR (400 MHz, CDCl<sub>3</sub>)  $\delta$  (ppm) 7.28-7.21 (m, 1H), 7.12-7.09 (m, 1H), 6.98 (d,  $J$  = 2.5 Hz, 1H),

4.52 (d,  $J = 6.5$  Hz, 1H), 4.21-4.15 (m, 1H), 3.13 (d,  $J = 7.0$  Hz, 2H), 2.23 (s, 3H);  $^{13}\text{C}$  NMR (100 MHz,  $\text{CDCl}_3$ )  $\delta$  (ppm) 204.3, 137.4, 134.6, 128.8, 120.6, 120.2, 119.5, 111.5, 111.3, 43.7, 35.4, 30.2, 26.9; ESI-HRMS: calcd. for  $\text{C}_{13}\text{H}_{10}\text{ClN}_5\text{O}+\text{Na}$  310.04743, found 310.04768; 94% ee; The enantiomeric ratio was determined by HPLC on Chiralpak aD column (20% 2-propanol/hexane, 1.0 mL/min, detection at 254 nm),  $t_{\text{minor}} = 11.20$  min,  $t_{\text{major}} = 13.51$  min.

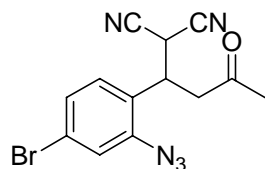

**3c**, 82% yield. yellow solid, m.p. 97-99 °C;  $^1\text{H}$  NMR (400 MHz,  $\text{CDCl}_3$ )  $\delta$  (ppm) 7.37-7.34 (m, 1H), 6.90-6.88 (m, 1H), 6.81 (d,  $J = 2.2$  Hz, 1H), 4.50 (d,  $J = 6.4$  Hz, 1H), 4.20-4.15 (m, 1H), 3.13 (d,  $J = 7.0$  Hz, 2H), 2.22 (s, 3H);  $^{13}\text{C}$  NMR (100 MHz,  $\text{CDCl}_3$ )  $\delta$  (ppm) 204.5, 142.2, 138.8, 130.0, 123.6, 115.8, 111.6, 111.4, 109.4, 43.9, 35.0, 30.2, 27.2; IR (KBr)  $\text{cm}^{-1}$  2226, 1715; ESI-HRMS: calcd. for  $\text{C}_{13}\text{H}_{10}\text{BrN}_5\text{O}+\text{Na}$  353.99612, found 353.99704; 97% ee; The enantiomeric ratio was determined by HPLC on Chiralpak AD column (10% 2-propanol/hexane, 1.0 mL/min, detection at 254 nm),  $t_{\text{minor}} = 20.17$  min,  $t_{\text{major}} = 22.50$  min.

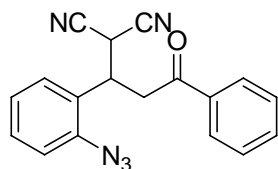

**3d**, 73% yield. yellow solid, m.p. 101-103 °C;  $^1\text{H}$  NMR (400 MHz,  $\text{CDCl}_3$ )  $\delta$  (ppm) 7.96 (d,  $J = 7.8$  Hz, 2H), 7.65-7.61 (m, 1H), 7.52-7.40 (m, 4H), 7.25-7.17 (m, 2H), 4.66 (d,  $J = 6.2$  Hz, 1H), 4.47-4.42 (m, 1H), 3.80-3.57 (m, 2H);  $^{13}\text{C}$  NMR (100 MHz,  $\text{CDCl}_3$ )  $\delta$  (ppm) 196.0, 138.2, 135.8, 134.1, 130.2, 128.9, 128.6, 128.6, 128.1, 128.1, 127.4, 125.5, 118.8, 111.9, 111.6, 38.2, 36.7, 27.4; ESI-HRMS: calcd. for  $\text{C}_{18}\text{H}_{13}\text{N}_5\text{O}+\text{Na}$  338.10087, found 338.10123; 93% ee; The enantiomeric ratio was determined by HPLC on Chiralpak AD column (20% 2-propanol/hexane, 1.0 mL/min, detection at 254 nm),  $t_{\text{major}} = 12.94$  min,  $t_{\text{minor}} = 15.61$  min.

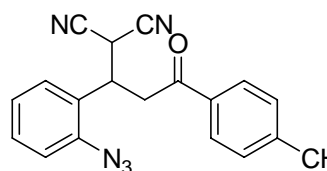

**3e**, 76% yield. yellow solid, m.p. 110-112 °C;  $^1\text{H}$  NMR (400 MHz,  $\text{CDCl}_3$ )  $\delta$  (ppm) 7.85 (d,  $J = 8.1$  Hz, 2H), 7.45-7.38 (m, 2H), 7.29-7.16 (m, 4H), 4.65 (d,  $J = 6.1$  Hz, 1H), 4.45-4.40 (m, 1H), 3.75-3.56 (m, 2H), 2.42 (s, 3H);  $^{13}\text{C}$  NMR (100 MHz,  $\text{CDCl}_3$ )  $\delta$  (ppm) 195.6, 145.1, 138.2, 133.3, 130.1, 129.5, 129.5, 128.6, 128.2, 128.2, 127.5, 125.5, 118.8, 111.9, 111.5, 39.0, 35.6, 27.4, 21.7; ESI-HRMS: calcd. for  $\text{C}_{19}\text{H}_{15}\text{N}_5\text{O}+\text{H}$  330.13560, found 330.13494; 93% ee; The enantiomeric ratio was determined by HPLC on Chiralpak AD column (20% 2-propanol/hexane, 1.0 mL/min, detection at 254 nm),  $t_{\text{major}} = 15.57$  min,  $t_{\text{minor}} = 18.20$  min.

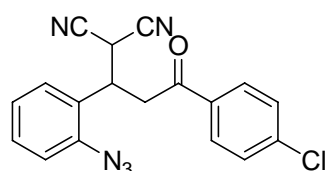

**3f**, 81% yield. yellow solid, m.p. 121-122 °C;  $^1\text{H}$  NMR (400 MHz,  $\text{CDCl}_3$ )  $\delta$  (ppm) 7.89 (d,  $J = 8.6$  Hz, 2H), 7.48-7.40 (m, 4H), 7.25-7.17 (m, 2H), 4.62 (d,  $J = 6.3$ , 1H), 4.42-4.40 (m, 1H), 3.75-3.56 (m, 2H);  $^{13}\text{C}$  NMR (100 MHz,  $\text{CDCl}_3$ )  $\delta$  (ppm) 194.8, 140.6, 138.2, 134.1, 130.3, 130.2, 129.5, 129.4, 129.2, 128.6, 127.2, 125.5, 118.8, 111.8, 111.5, 38.2, 36.8, 27.3; ESI-HRMS: calcd. for  $\text{C}_{18}\text{H}_{12}\text{ClN}_5\text{O}+\text{Na}$  372.06224, found 372.06226; 91% ee; The enantiomeric ratio was determined by HPLC on Chiralpak AD column (20% 2-propanol/hexane, 1.0 mL/min, detection at 254 nm),  $t_{\text{major}} = 14.86$  min,  $t_{\text{minor}} = 17.37$  min.

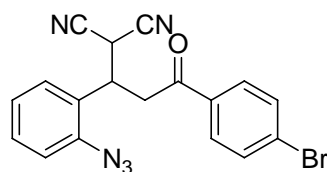

**3g**, 80% yield. yellow solid, m.p. 129-130 °C;  $^1\text{H}$  NMR (400 MHz,  $\text{CDCl}_3$ )  $\delta$  (ppm) 7.81 (d,  $J = 8.6$  Hz, 2H), 7.63 (d,  $J = 8.6$ , 2H), 7.44-7.40 (m, 2H), 7.25-7.16 (m, 2H), 4.62 (d,  $J = 6.3$ , 1H), 4.42-4.40 (m, 1H), 3.74-3.55 (m, 2H);  $^{13}\text{C}$  NMR (100 MHz,  $\text{CDCl}_3$ )  $\delta$  (ppm) 195.0, 138.2, 134.5, 132.2, 132.2, 130.3, 129.6, 129.5, 129.4, 128.6, 127.2, 125.5, 118.9, 111.8, 111.5, 39.2, 35.8, 27.3; ESI-HRMS: calcd. for  $\text{C}_{18}\text{H}_{12}\text{BrN}_5\text{O}+\text{Na}$  416.01224, found 416.01174; 90% ee; The enantiomeric

ratio was determined by HPLC on Chiralpak AD column (20% 2-propanol/hexane, 1.0 mL/min, detection at 254 nm),  $t_{\text{major}} = 16.88$  min,  $t_{\text{minor}} = 19.66$  min.

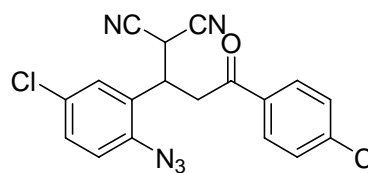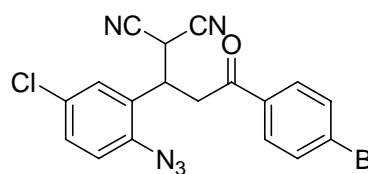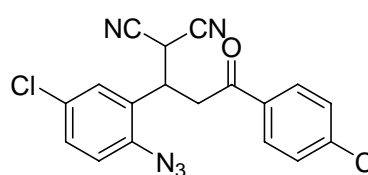

$\text{CDCl}_3$ )  $\delta$  (ppm) 194.4, 142.0, 138.5, 130.0, 130.0, 129.3, 129.3, 129.1, 129.0, 124.1, 120.6, 120.3, 120.2, 118.4, 111.5, 39.0, 35.4, 27.2; ESI-HRMS: calcd. for  $\text{C}_{18}\text{H}_{11}\text{Cl}_2\text{N}_5\text{O}+\text{Na}$  406.02374, found 406.02369; 84% ee; The enantiomeric ratio was determined by HPLC on Chiralpak AD column (20% 2-propanol/hexane, 1.0 mL/min, detection at 254 nm),  $t_{\text{minor}} = 20.65$  min,  $t_{\text{major}} = 30.34$  min.

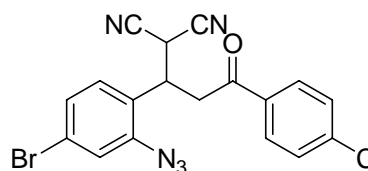

**3k**, 60% yield. yellow solid, m.p. 139-140 °C;  $^1\text{H}$  NMR (400 MHz,  $\text{CDCl}_3$ )  $\delta$  (ppm) 7.84 (d,  $J = 7.7$  Hz, 2H), 7.42 (d,  $J = 8.3$  Hz, 1H), 7.30-7.26 (m, 2H), 6.88-6.80 (m, 2H), 4.61 (d,  $J = 6.1$  Hz, 1H), 4.39-4.35 (m, 1H), 3.71-3.55 (m, 2H), 2.42 (s, 3H);  $^{13}\text{C}$  NMR (100 MHz,  $\text{CDCl}_3$ )  $\delta$  (ppm) 195.4, 145.2, 142.1, 138.1, 133.2, 130.0, 130.0, 129.6, 128.2, 128.2, 124.0, 115.8, 111.7, 111.5, 109.4, 39.0, 35.4, 27.4, 21.7; ESI-HRMS: calcd. for  $\text{C}_{19}\text{H}_{14}\text{BrN}_5\text{O}+\text{Na}$  430.02786, found 430.02774; 95% ee; The enantiomeric ratio was determined by HPLC on Chiralpak AS column (20% 2-propanol/hexane, 1.0 mL/min, detection at 254 nm),  $t_{\text{major}} = 17.31$  min,  $t_{\text{minor}} = 22.57$  min.

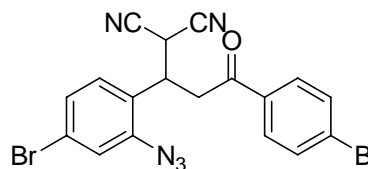

**3l**, 68% yield. yellow solid, m.p. 157-158 °C;  $^1\text{H}$  NMR (400 MHz,  $\text{CDCl}_3$ )  $\delta$  (ppm) 7.81 (d,  $J = 8.5$  Hz, 2H), 7.63 (d,  $J = 8.5$  Hz, 2H), 7.39 (d,  $J = 8.5$  Hz, 1H), 6.88-6.80 (m, 2H), 4.57 (d,  $J = 6.3$  Hz, 1H), 4.38-4.33 (m, 1H), 3.70-3.53 (m, 2H);  $^{13}\text{C}$  NMR (100 MHz,  $\text{CDCl}_3$ )  $\delta$  (ppm) 194.8, 142.3, 139.8, 134.4, 134.3, 132.3, 132.3, 130.0, 129.5, 129.5, 123.7, 115.9, 111.7, 111.5, 109.5, 39.1, 35.5, 27.4; ESI-HRMS: calcd. for  $\text{C}_{18}\text{H}_{11}\text{Br}_2\text{N}_5\text{NaO}+\text{Na}$  495.92068, found 495.92061; 91% ee; The enantiomeric ratio was determined by HPLC on Chiralpak AS column (20% 2-propanol/hexane, 1.0 mL/min, detection at 254 nm),  $t_{\text{major}} = 21.56$  min,  $t_{\text{minor}} = 23.92$  min.

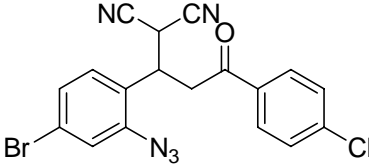 **3m**, 66% yield. yellow solid, m.p. 151-152 °C; <sup>1</sup>H NMR (400 MHz, CDCl<sub>3</sub>) δ (ppm) 7.92 (d, *J* = 8.6 Hz, 2H), 7.54-7.43 (m, 3H), 6.93-6.85 (m, 2H), 4.62 (d, *J* = 6.3 Hz, 1H), 4.43-4.38 (m, 1H), 3.76-3.58 (m, 2H); <sup>13</sup>C NMR (100 MHz, CDCl<sub>3</sub>) δ (ppm) 194.6, 142.3, 140.7, 139.8, 134.0, 130.0, 130.0, 129.5, 129.4, 129.3, 123.7, 115.9, 111.7, 111.5, 109.5, 39.1, 35.5, 27.4; ESI-HRMS: calcd. for C<sub>18</sub>H<sub>11</sub>BrClN<sub>5</sub>O+Na 449.97321, found 449.97315; 93% ee; The enantiomeric ratio was determined by HPLC on Chiralpak AD column (20% 2-propanol/hexane, 1.0 mL/min, detection at 254 nm), *t*<sub>major</sub> = 19.11 min, *t*<sub>minor</sub> = 21.87 min.

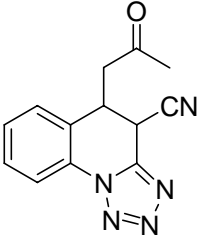 **4a**, 92% yield. yellow solid, m.p. 197-198 °C; <sup>1</sup>H NMR (400 MHz, CDCl<sub>3</sub>) δ (ppm) 8.07-8.03 (m, 1H), 7.60-7.45 (m, 3H), 4.93-4.89 (m, 1H), 4.16-4.11 (m, 1H), 3.17-2.92 (m, 1H), 2.71 (d, *J* = 6.8 Hz, 1H), 2.18 (d, *J* = 33.6 Hz, 3H); <sup>13</sup>C NMR (100 MHz, CDCl<sub>3</sub>) δ (ppm) 204.3, 204.0, 145.7, 144.9, 130.3, 130.2, 130.1, 130.0, 129.8, 129.7, 129.2, 128.7, 126.3, 126.2, 118.1, 118.1, 114.4, 113.3, 45.5, 43.8, 36.7, 34.0, 30.4, 30.1, 28.6, 27.0; IR (KBr) cm<sup>-1</sup> 3425, 3127, 2779, 2116, 1719, 1401, 825, 770; ESI-HRMS: calcd. for C<sub>13</sub>H<sub>11</sub>N<sub>5</sub>O+H 254.10349, found 254.10364; [α]<sub>D</sub><sup>25</sup> = +60.0 (c 1.12, EtOAc), 56/44 dr, the enantiomeric ratio was determined by HPLC on Chiralpak AD column (30% 2-propanol/hexane, 1.0 mL/min, detection at 254 nm), 95% ee, *t*<sub>minor</sub> = 7.38 min, *t*<sub>major</sub> = 8.86 min; 96% ee, *t*<sub>minor</sub> = 12.32 min, *t*<sub>major</sub> = 26.11 min.

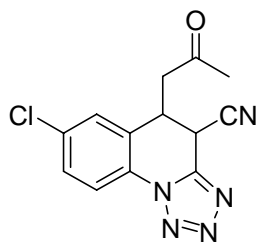

**4b**, 83% yield. yellow solid, m.p. 209-211 °C;  $^1\text{H}$  NMR (400 MHz,  $\text{CDCl}_3$ )  $\delta$  (ppm) 8.07-8.01 (m, 1H), 7.25-7.22 (m, 1H), 7.16-7.14 (m, 1H), 4.93-4.88 (m, 1H), 4.13-4.09 (m, 1H), 3.18-2.90 (m, 1H), 2.70-2.68 (m, 1H), 2.20 (s, 3H);  $^{13}\text{C}$  NMR (100 MHz,  $\text{CDCl}_3$ )  $\delta$  (ppm) 204.0, 203.8, 145.3, 144.5, 142.1, 141.8, 128.4, 128.3, 127.0, 126.8, 120.4, 120.2, 119.8, 119.7, 119.4, 114.2, 113.1, 45.3, 43.6, 36.8, 34.1, 30.3, 30.1, 30.0, 28.4, 26.9; IR (KBr)  $\text{cm}^{-1}$  3426, 3127, 2779, 1717, 1400, 827, 776; ESI-HRMS: calcd. for  $\text{C}_{13}\text{H}_{10}\text{ClN}_5\text{O}+\text{Na}$  310.04731, found 310.04768;  $[\alpha]_{\text{D}}^{25} = +42.3$  (c 0.6, EtOAc), 95/5 dr, the enantiomeric ratio was determined by HPLC on Chiralpak AD column (30% 2-propanol/hexane, 1.0 mL/min, detection at 254 nm), 94% ee,  $t_{\text{major}} = 10.83$  min,  $t_{\text{minor}} = 13.07$  min; 99% ee,  $t_{\text{major}} = 26.23$  min,  $t_{\text{minor}} = 36.88$  min.

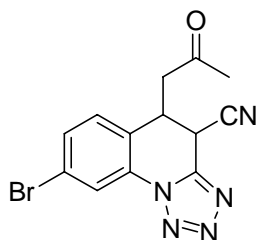

**4c**, 81% yield. yellow solid, m.p. 215-216 °C;  $^1\text{H}$  NMR (400 MHz,  $\text{CDCl}_3$ )  $\delta$  (ppm) 7.72-7.71 (m, 1H), 7.62-7.49 (m, 1H), 7.16-7.11 (m, 1H), 4.92-4.87 (m, 1H), 4.14-4.08 (m, 1H), 3.17-2.88 (m, 1H), 2.69 (d,  $J = 6.5$  Hz, 1H), 2.19 (s, 3H);  $^{13}\text{C}$  NMR (100 MHz,  $\text{CDCl}_3$ )  $\delta$  (ppm) 204.1, 203.9, 145.9, 145.1, 142.6, 142.5, 133.1, 131.3, 131.1, 130.8, 130.4, 122.3, 122.2, 120.3, 119.8, 114.2, 113.2, 108.9, 45.5, 43.8, 36.3, 33.9, 33.8, 30.4, 30.1, 28.6, 27.1, 27.0; IR (KBr)  $\text{cm}^{-1}$  3420, 3109, 2780, 2114, 1720, 1400, 823, 769; ESI-HRMS: calcd. for  $\text{C}_{13}\text{H}_{10}\text{BrN}_5\text{O}+\text{Na}$  353.99600, found 353.99744;  $[\alpha]_{\text{D}}^{25} = +71.9$  (c 0.7, EtOAc), 53/47 dr, the enantiomeric ratio was determined by HPLC on Chiralpak AD column (30% 2-propanol/hexane, 1.0 mL/min, detection at 254 nm), 88% ee,  $t_{\text{minor}} = 9.76$  min,  $t_{\text{major}} = 11.55$  min; 98% ee,  $t_{\text{minor}} = 22.38$  min,  $t_{\text{major}} = 26.20$  min.



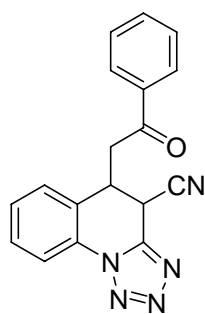

**4d**, 94% yield. yellow solid, m.p. 207-209 °C;  $^1\text{H}$  NMR (400 MHz,  $\text{CDCl}_3$ )  $\delta$  (ppm) 8.09-8.03 (m, 1H), 7.95-7.81 (m, 2H), 7.60-7.41 (m, 5H), 5.00-4.96 (m, 1H), 4.35 (m, 1H), 3.63-3.51 (m, 1H), 3.23-3.16 (m, 1H);  $^{13}\text{C}$  NMR (100 MHz,  $\text{CDCl}_3$ )  $\delta$  (ppm) 195.5, 145.8, 145.0, 135.7, 135.4, 134.2, 134.1, 130.3, 130.2, 130.1, 130.0, 129.7, 129.4, 128.9, 128.1, 128.0, 126.6, 118.2, 114.5, 113.4, 41.0, 39.1, 37.1, 34.4, 28.9, 27.2; IR (KBr)  $\text{cm}^{-1}$  3427, 3122, 2779, 2110, 1720, 1683, 1400, 689; ESI-HRMS: calcd. for  $\text{C}_{18}\text{H}_{13}\text{N}_5\text{O}+\text{H}$  316.11936, found 316.11929;  $[\alpha]_{\text{D}}^{25} = +43.2$  (c 0.6, EtOAc), 60/40 dr, the enantiomeric ratio was determined by HPLC on Chiralpak AD column (30% 2-propanol/hexane, 1.0 mL/min, detection at 254 nm), 90% ee,  $t_{\text{major}} = 22.85$  min,  $t_{\text{minor}} = 26.56$  min.

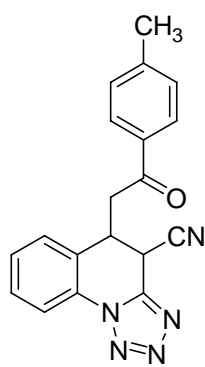

**4e**, 93% yield. yellow solid, m.p. 211-212 °C;  $^1\text{H}$  NMR (400 MHz,  $\text{CDCl}_3$ )  $\delta$  (ppm) 8.10-8.04 (m, 1H), 7.86-7.83 (m, 2H), 7.59-7.44 (m, 3H), 7.29-7.22 (m, 2H), 5.01-4.97 (m, 1H), 4.35-4.34 (m, 1H), 3.60-3.50 (m, 1H), 3.19-3.11 (m, 1H), 2.41 (s, 3H);  $^{13}\text{C}$  NMR (100 MHz,  $\text{CDCl}_3$ )  $\delta$  (ppm) 195.0, 194.9, 145.8, 145.3, 145.2, 145.0, 133.3, 133.0, 130.5, 130.5, 130.4, 130.3, 130.2, 130.1, 130.0, 129.6, 129.6, 129.5, 129.5, 129.4, 129.3, 129.2, 128.8, 128.3, 128.1, 126.7, 126.3, 118.1, 114.5, 113.4, 40.8, 38.9, 37.1, 34.4, 28.9, 27.2, 21.8, 21.7; IR (KBr)  $\text{cm}^{-1}$  3425, 3123, 2779, 2110, 1720, 1679, 1400, 765; ESI-HRMS: calcd. for  $\text{C}_{19}\text{H}_{15}\text{N}_5\text{O}+\text{Na}$  352.11724, found 352.116884;  $[\alpha]_{\text{D}}^{25} = +54.8$  (c 0.7, EtOAc), 63/37 dr, the enantiomeric ratio was determined by HPLC on Chiralpak AD column (10% 2-propanol/hexane, 1.0

mL/min, detection at 254 nm), 99% ee,  $t_{\text{minor}} = 50.12$  min,  $t_{\text{major}} = 54.32$  min; 99% ee,  $t_{\text{major}} = 84.63$  min,  $t_{\text{minor}} = 112.09$  min.

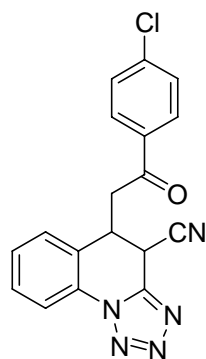

**4f**, 87% yield. yellow solid, m.p. 223-224 °C;  $^1\text{H}$  NMR (400 MHz,  $\text{CDCl}_3$ )  $\delta$  (ppm) 8.07-8.01 (m, 1H), 7.88-7.77 (m, 2H), 7.60-7.38 (m, 5H), 5.01-4.95 (m, 1H), 4.39-4.32 (m, 1H), 3.64-3.41 (m, 1H), 3.22 (d,  $J = 6.7$  Hz, 1H);  $^{13}\text{C}$  NMR (100 MHz,  $\text{CDCl}_3$ )  $\delta$  (ppm) 194.4, 194.3, 145.7, 145.0, 140.7, 140.6, 134.0, 133.7, 130.4, 130.3, 130.2, 130.1, 130.1, 130.1, 129.7, 129.6, 129.6, 129.6, 129.5, 129.4, 129.2, 129.1, 129.0, 126.4, 126.3, 116.2, 114.5, 113.5, 41.0, 38.4, 36.9, 34.3, 29.0, 27.2; IR (KBr)  $\text{cm}^{-1}$  3422, 3120, 2780, 2111, 1718, 1681, 1400, 784; ESI-HRMS: calcd. for  $\text{C}_{18}\text{H}_{12}\text{ClN}_5\text{O}+\text{Na}$  372.06212, found 372.06246;  $[\alpha]_{\text{D}}^{25} = +89.6$  (c 1.1, EtOAc), 61/39 dr, the enantiomeric ratio was determined by HPLC on Chiralpak AD column (20% 2-propanol/hexane, 0.5 mL/min), 92% ee,  $t_{\text{minor}} = 44.49$  min,  $t_{\text{major}} = 49.72$  min; 93% ee,  $t_{\text{major}} = 93.62$  min,  $t_{\text{minor}} = 100.62$  min.

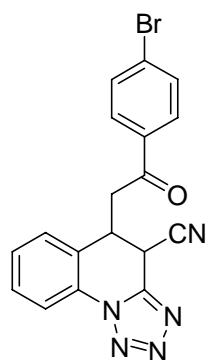

**4g**, 88% yield. yellow solid, m.p. 230-231 °C;  $^1\text{H}$  NMR (400 MHz,  $\text{CDCl}_3$ )  $\delta$  (ppm) 8.15-8.08 (m, 1H), 7.85-7.72 (m, 2H), 7.67-7.48 (m, 5H), 5.03-4.88 (m, 1H), 4.38-4.35 (m, 1H), 3.66-3.44 (m, 1H), 3.20-3.16 (m, 1H);  $^{13}\text{C}$  NMR (100 MHz,  $\text{CDCl}_3$ )  $\delta$  (ppm) 194.5, 194.3, 145.6, 144.9, 134.1, 132.2, 132.2, 130.4, 130.4, 130.3, 130.3, 130.2, 130.2, 129.7, 129.7, 129.6, 129.6, 129.5, 129.5, 129.4, 129.3, 128.9, 126.4, 126.2, 126.1, 118.3, 118.2, 114.3, 113.3, 41.0, 39.2, 37.0, 34.4, 28.9, 27.2; IR (KBr)  $\text{cm}^{-1}$  3429, 3121, 2781, 2116, 1713, 1400, 824, 775; ESI-HRMS: calcd.

for  $C_{18}H_{12}BrN_5O+Na$  416.01198, found 416.01174;  $[\alpha]_D^{25} = +34.3$  (c 0.6, EtOAc), 57/43 dr, the enantiomeric ratio was determined by HPLC on Chiralpak AD column (30% 2-propanol/hexane, 1.0 mL/min, detection at 254 nm), 90% ee,  $t_{minor} = 26.28$  min,  $t_{major} = 30.70$  min; 92% ee,  $t_{major} = 53.29$  min,  $t_{minor} = 56.84$  min.

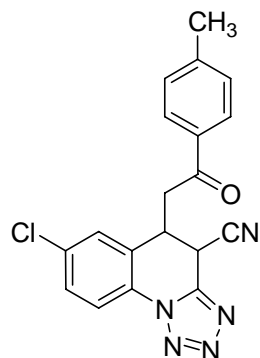

**4h**, 86% yield. yellow solid, m.p. 231-233 °C;  $^1H$  NMR (400 MHz,  $CDCl_3$ )  $\delta$  (ppm) 8.09-8.04 (m, 1H), 7.86-7.68 (m, 2H), 7.30-7.28 (m, 1H), 7.24-7.17 (m, 3H), 4.99-4.95 (m, 1H), 4.33-4.29 (m, 1H), 3.63-3.41 (m, 1H), 3.19-3.03 (m, 1H), 2.41 (s, 3H);  $^{13}C$  NMR (100 MHz,  $CDCl_3$ )  $\delta$  (ppm) 194.6, 145.5, 144.6, 142.2, 141.8, 132.8, 129.6, 128.7, 128.4, 128.3, 128.1, 126.9, 120.4, 120.1, 119.8, 119.7, 119.5, 114.3, 113.1, 40.7, 38.7, 37.3, 34.6, 28.7, 27.1, 21.7; IR (KBr)  $cm^{-1}$  3426, 3120, 2779, 2113, 1718, 1685, 1400, 756, 667; ESI-HRMS: calcd. for  $C_{19}H_{14}ClN_5O+Na$  386.07706, found 386.07664;  $[\alpha]_D^{25} = 0.5$  (c 1.4, EtOAc), 62/38 dr, the enantiomeric ratio was determined by HPLC on Chiralpak AD column (30% 2-propanol/hexane, 1.0 mL/min, detection at 254 nm), 86% ee,  $t_{minor} = 14.82$  min,  $t_{major} = 16.48$  min; 83% ee,  $t_{major} = 33.52$  min,  $t_{minor} = 92.37$  min.

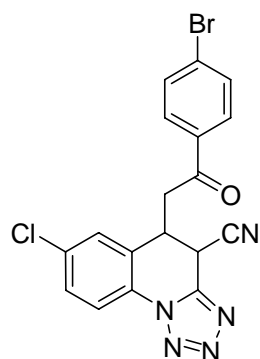

**4i**, 85% yield. yellow solid, m.p. 245-247 °C;  $^1H$  NMR (400 MHz,  $CDCl_3$ )  $\delta$  (ppm) 8.10-8.04 (m, 1H), 7.82-7.80 (m, 1H), 7.73-7.68 (m, 1H), 7.64-7.57 (m, 2H), 7.27-7.18 (m, 2H), 4.98-4.94 (m, 1H), 4.34-4.31 (m, 1H), 3.65-3.36 (m, 1H), 3.16-3.10 (m, 1H);  $^{13}C$  NMR (100 MHz,  $CDCl_3$ )  $\delta$  (ppm) 194.5, 194.5, 144.5, 142.3,

140.2, 133.9, 133.9, 133.8, 133.6, 133.5, 132.3, 132.1, 132.0, 129.8, 129.6, 129.5, 129.5, 129.4, 129.3, 128.4, 125.9, 125.8, 125.6, 120.5, 120.2, 119.9, 119.8, 119.6, 119.1, 118.4, 40.9, 39.0, 37.1, 34.5, 28.8, 27.1; IR (KBr)  $\text{cm}^{-1}$  3425, 3120, 2778, 2113, 1719, 1685, 1400, 756, 660; ESI-HRMS: calcd. for  $\text{C}_{18}\text{H}_{11}\text{BrClN}_5\text{O}+\text{Na}$  449.97316, found 449.97307;  $[\alpha]_{\text{D}}^{25} = +18$  (c 0.7, EtOAc), 60/40 dr, the enantiomeric ratio was determined by HPLC on Chiralpak AD column (30% 2-propanol/hexane, 1.0 mL/min, detection at 254 nm), 82% ee,  $t_{\text{minor}} = 16.06$  min,  $t_{\text{major}} = 18.01$  min; 81% ee,  $t_{\text{major}} = 44.40$  min,  $t_{\text{minor}} = 86.34$  min.

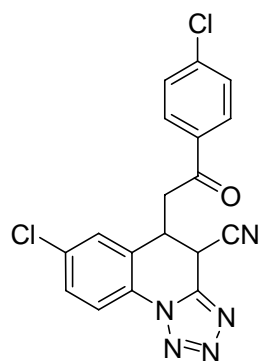

**4j**, 89% yield. yellow solid, m.p. 243-245 °C;  $^1\text{H}$  NMR (400 MHz,  $\text{CDCl}_3$ )  $\delta$  (ppm) 8.08-8.02 (m, 1H), 7.91-7.75 (m, 2H), 7.47-7.40 (m, 2H), 7.25-7.18 (m, 2H), 5.00-4.94 (m, 1H), 4.36-4.30 (m, 1H), 3.65-3.37 (m, 1H), 3.22-3.09 (m, 1H);  $^{13}\text{C}$  NMR (100 MHz,  $\text{CDCl}_3$ )  $\delta$  (ppm) 194.0, 145.3, 144.5, 142.2, 140.9, 133.8, 133.6, 129.6, 129.4, 129.3, 128.5, 128.3, 127.0, 126.8, 120.5, 120.2, 119.9, 119.8, 119.7, 114.2, 40.9, 39.1, 37.1, 34.5, 28.8, 27.1; IR (KBr)  $\text{cm}^{-1}$  3427, 3126, 2778, 2110, 1717, 1679, 1400, 827, 779; ESI-HRMS: calcd. for  $\text{C}_{18}\text{H}_{11}\text{Cl}_2\text{N}_5\text{O}+\text{Na}$  406.02368, found 406.02347;  $[\alpha]_{\text{D}}^{25} = +3.0$  (c 0.5, EtOAc), 55/45, the enantiomeric ratio was determined by HPLC on Chiralpak AD column (20% 2-propanol/hexane, 1.0 mL/min, detection at 254 nm), 81% ee;  $t_{\text{minor}} = 17.13$  min,  $t_{\text{major}} = 20.05$  min; 88% ee,  $t_{\text{major}} = 43.30$  min,  $t_{\text{minor}} = 85.80$  min.

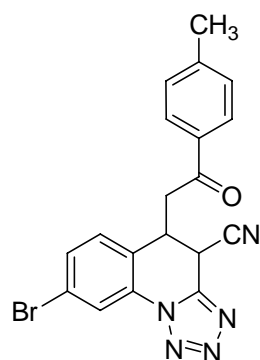

**4k**, 91% yield. yellow solid, m.p. 238-240 °C;  $^1\text{H}$  NMR (400 MHz,  $\text{CDCl}_3$ )  $\delta$  (ppm) 7.84-7.82 (m, 1H), 7.75-7.68 (m, 2H), 7.58-7.51 (m, 1H), 7.28-7.27 (m, 1H), 7.25-7.22 (m, 1H), 7.15-7.08 (m, 1H), 4.88-4.84 (m, 1H), 4.33-4.31 (m, 1H), 3.58-3.45 (m, 1H), 3.14-3.10 (m, 1H), 2.41 (s, 3H);  $^{13}\text{C}$  NMR (100 MHz,  $\text{CDCl}_3$ )  $\delta$  (ppm) 194.7, 145.5, 142.6, 142.5, 132.9, 131.3, 130.9, 130.4, 129.6, 128.3, 128.1, 122.6, 120.3, 119.7, 114.3, 108.9, 40.8, 38.9, 36.8, 34.2, 28.8, 27.4, 21.7; IR (KBr)  $\text{cm}^{-1}$  3427, 3125, 2778, 2115, 1721, 1400, 824, 773; ESI-HRMS: calcd. for  $\text{C}_{19}\text{H}_{14}\text{BrN}_5\text{O}+\text{Na}$  430.02780, found 430.02774;  $[\alpha]_D^{25} = +48.3$  (c 0.7, EtOAc), 58/42 dr, the enantiomeric ratio was determined by HPLC on Chiralpak AD column (30% 2-propanol/hexane, 1.0 mL/min, detection at 254 nm), 92% ee;  $t_{\text{minor}} = 16.00$  min,  $t_{\text{major}} = 17.98$  min; 95% ee,  $t_{\text{major}} = 25.04$  min,  $t_{\text{minor}} = 32.29$  min.

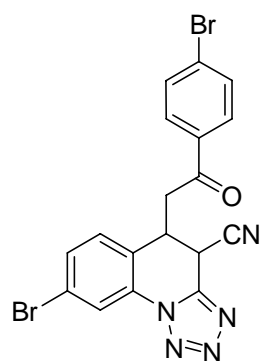

**4l**, 79% yield. yellow solid, m.p. 257-259 °C;  $^1\text{H}$  NMR (400 MHz,  $\text{CDCl}_3$ )  $\delta$  (ppm) 7.82-7.80 (m, 1H), 7.75-7.70 (m, 2H), 7.65-7.54 (m, 3H), 7.17-7.11 (m, 1H), 5.00-4.84 (m, 1H), 4.38-4.33 (m, 1H), 3.65-3.38 (m, 1H), 3.17 (d,  $J = 3.0$  Hz, 1H);  $^{13}\text{C}$  NMR (100 MHz,  $\text{CDCl}_3$ )  $\delta$  (ppm) 194.4, 194.3, 145.1, 142.7, 142.6, 134.2, 134.0, 132.3, 131.4, 131.2, 130.9, 130.6, 129.7, 129.6, 129.5, 122.3, 122.1, 120.3, 119.8, 114.2, 113.2, 108.9, 41.0, 39.3, 36.6, 34.1, 29.0, 27.3; IR (KBr)  $\text{cm}^{-1}$  3427, 3126, 2776, 2114, 1719, 1683, 1400, 826, 779; ESI-HRMS: calcd. for  $\text{C}_{18}\text{H}_{11}\text{Br}_2\text{N}_5\text{NaO}+\text{Na}$  495.92068, found 495.92061;  $[\alpha]_D^{25} = +31.0$  (c 0.8, EtOAc), 60/40 dr, the enantiomeric ratio was determined by HPLC on Chiralpak AD column

(30% 2-propanol/hexane, 1.0 mL/min, detection at 254 nm), 90% ee,  $t_{\text{minor}} = 35.90$  min,  $t_{\text{major}} = 39.51$  min.

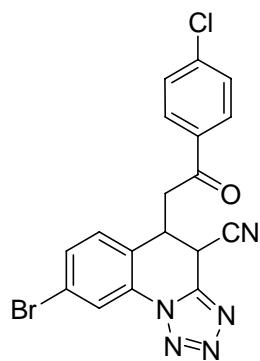

**4m**, 88% yield. yellow solid, m.p. 251-252 °C;  $^1\text{H}$  NMR (400 MHz,  $\text{CDCl}_3$ )  $\delta$  (ppm) 7.89-7.86 (m, 1H), 7.79-7.68 (m, 2H), 7.60-7.52 (m, 1H), 7.46-7.40 (m, 2H), 7.16-7.09 (m, 1H), 4.88-4.83 (m, 1H), 4.36-4.32 (m, 1H), 3.64-3.38 (m, 1H), 3.18 (d,  $J = 6.3$  Hz, 1H);  $^{13}\text{C}$  NMR (100 MHz,  $\text{CDCl}_3$ )  $\delta$  (ppm) 194.2, 194.1, 145.9, 145.1, 142.7, 142.6, 140.9, 140.8, 133.6, 131.4, 131.2, 130.9, 130.6, 129.6, 129.4, 129.3, 122.3, 122.2, 120.3, 119.8, 114.2, 108.9, 41.0, 38.3, 36.6, 34.1, 29.0, 27.3; IR (KBr)  $\text{cm}^{-1}$  3426, 3125, 2775, 2114, 1724, 1682, 1400, 756; ESI-HRMS: calcd. for  $\text{C}_{18}\text{H}_{11}\text{BrClN}_5\text{O}+\text{Na}$  449.97316, found 449.97305;  $[\alpha]_{\text{D}}^{25} = +2$  (c 0.3, EtOAc), 61/39 dr, the enantiomeric ratio was determined by HPLC on Chiralpak AD column (30% 2-propanol/hexane, 1.0 mL/min, detection at 254 nm), 92% ee,  $t_{\text{minor}} = 31.86$  min,  $t_{\text{major}} = 39.65$  min.

## NMR Spectra

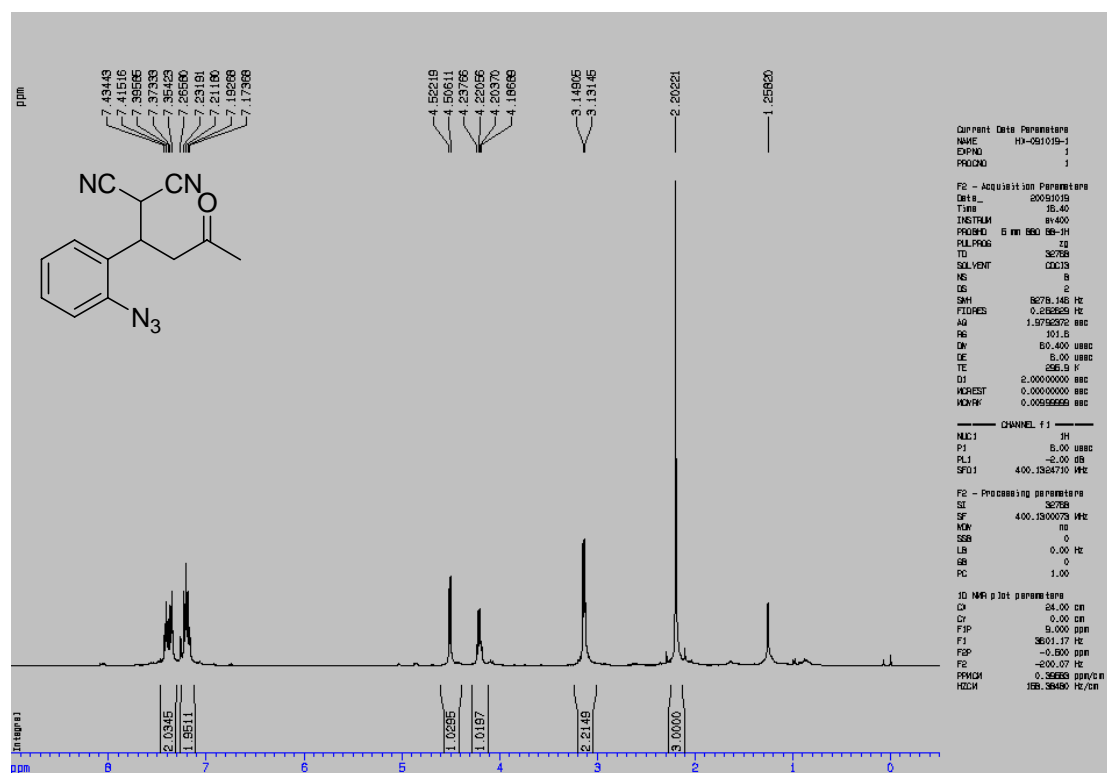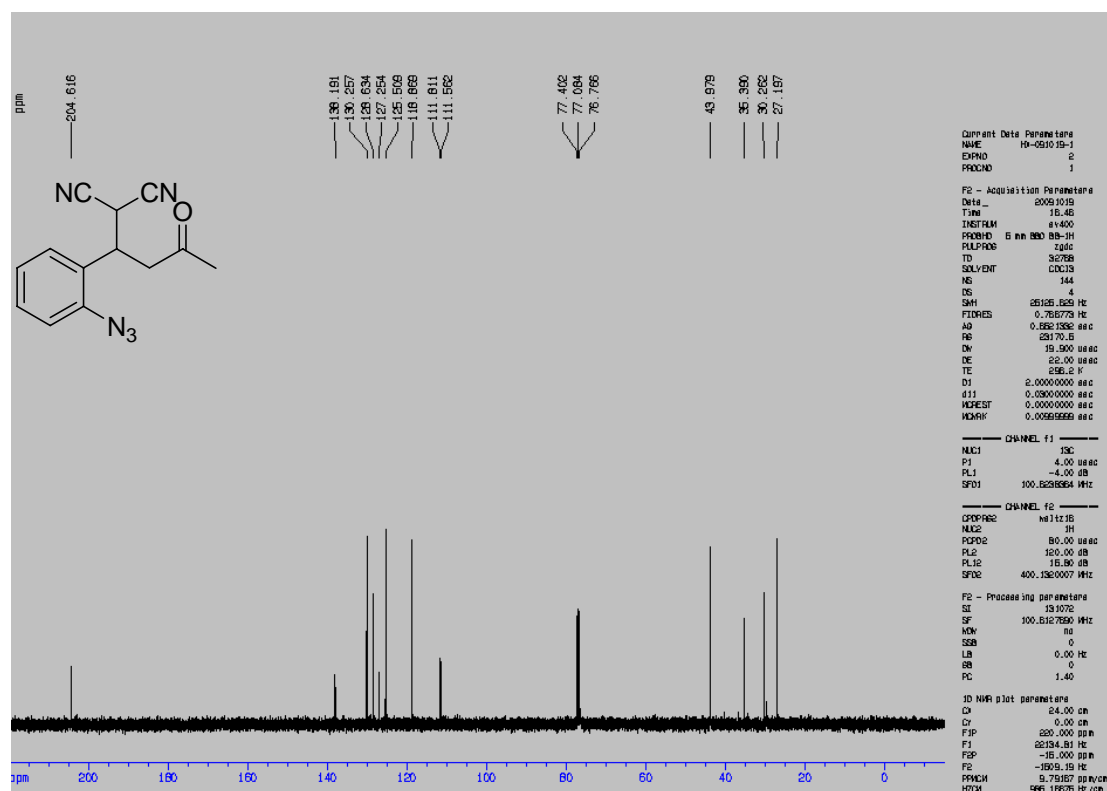

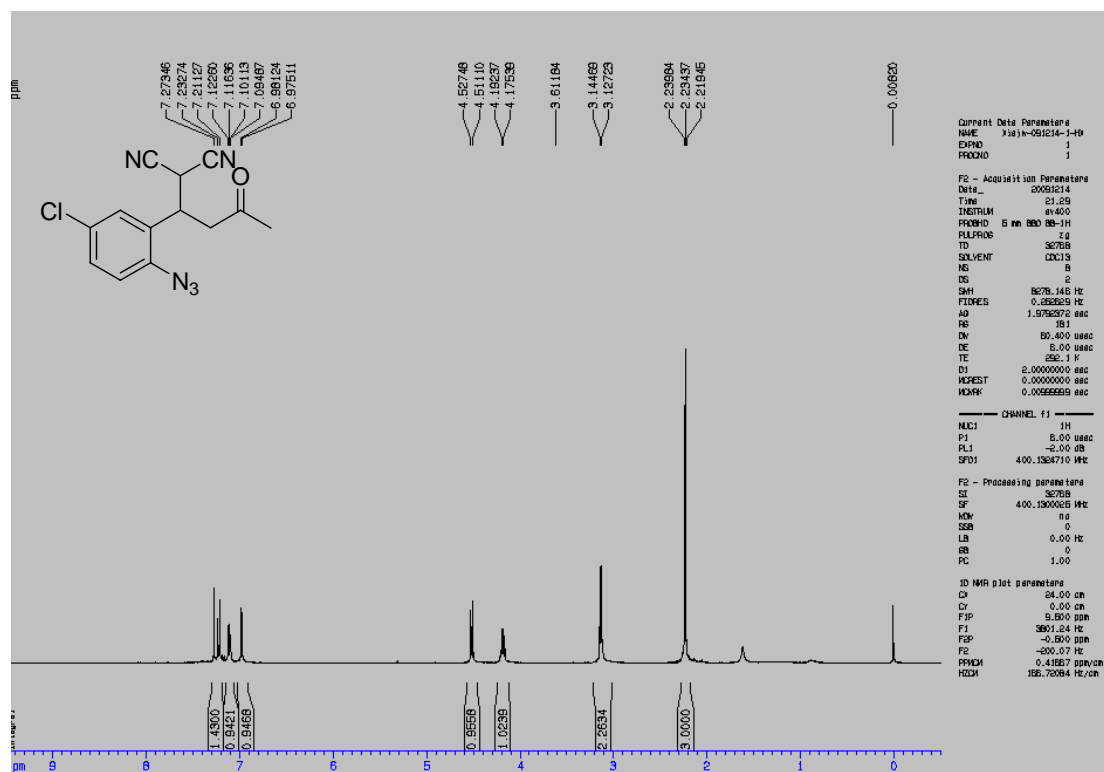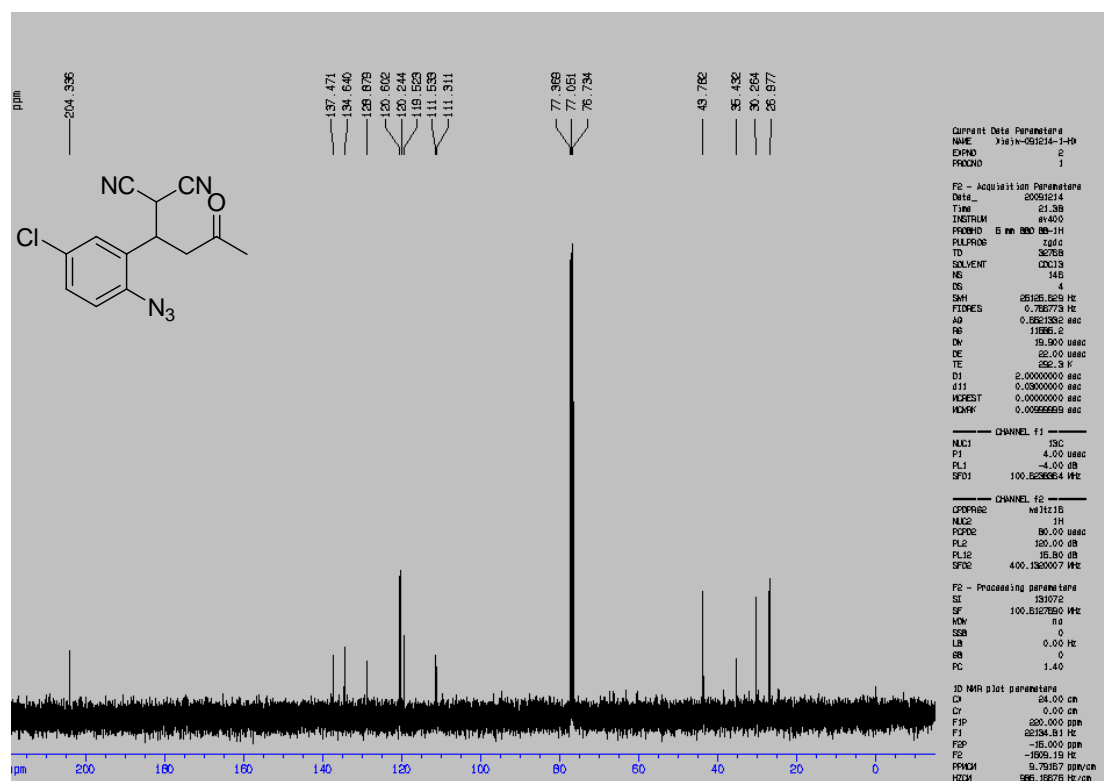



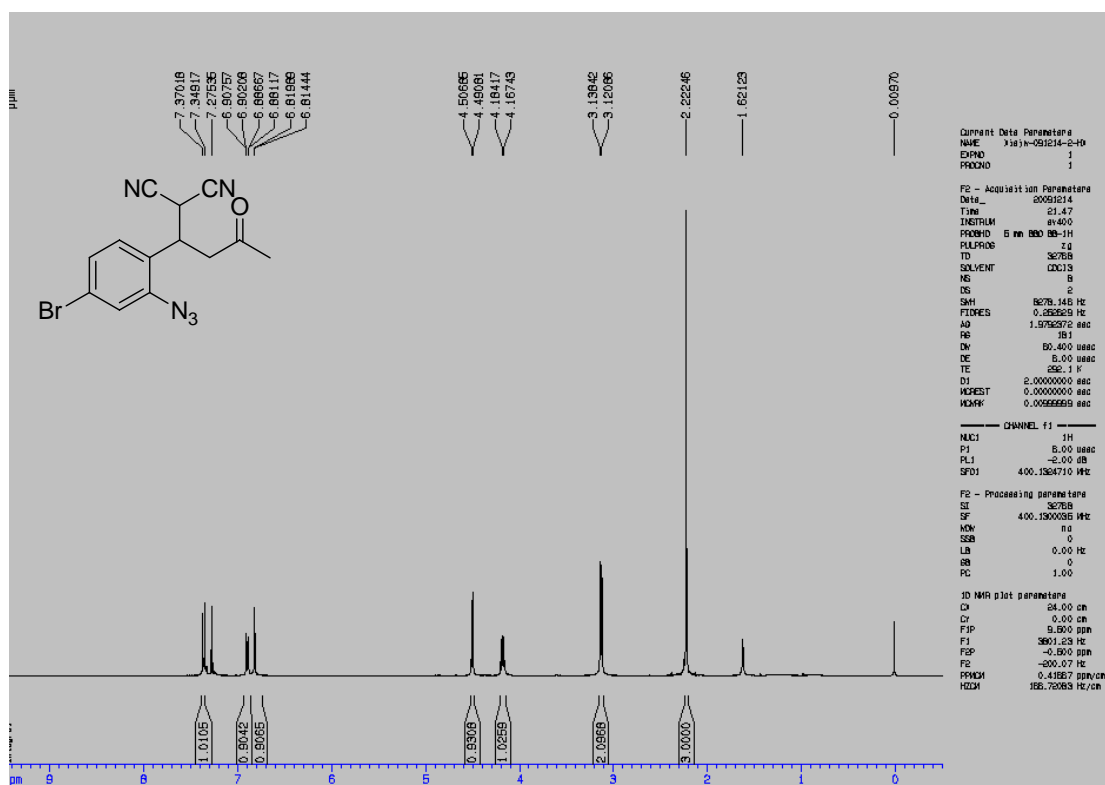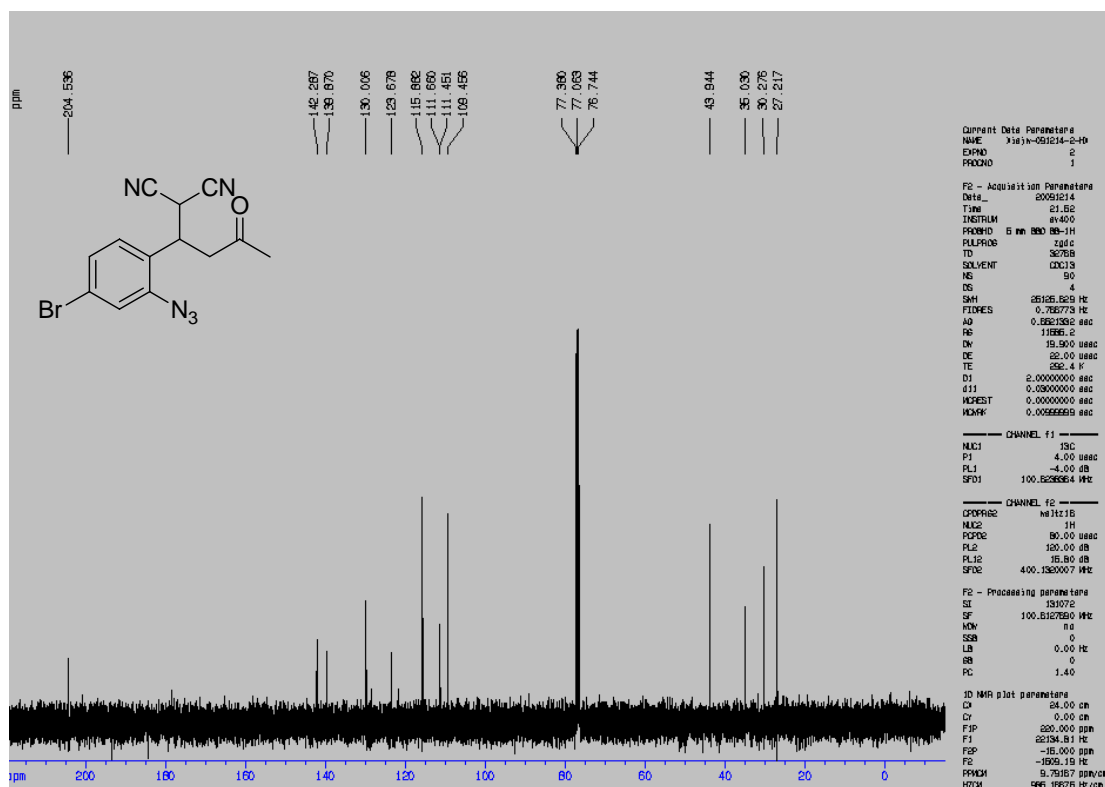

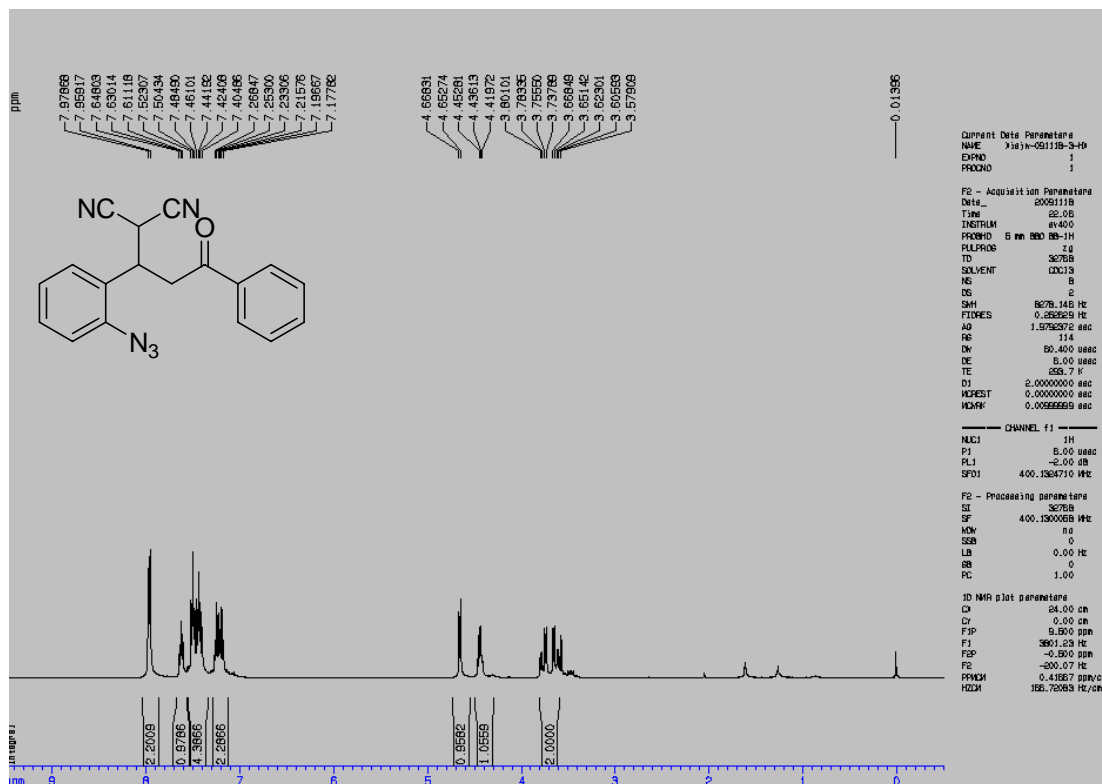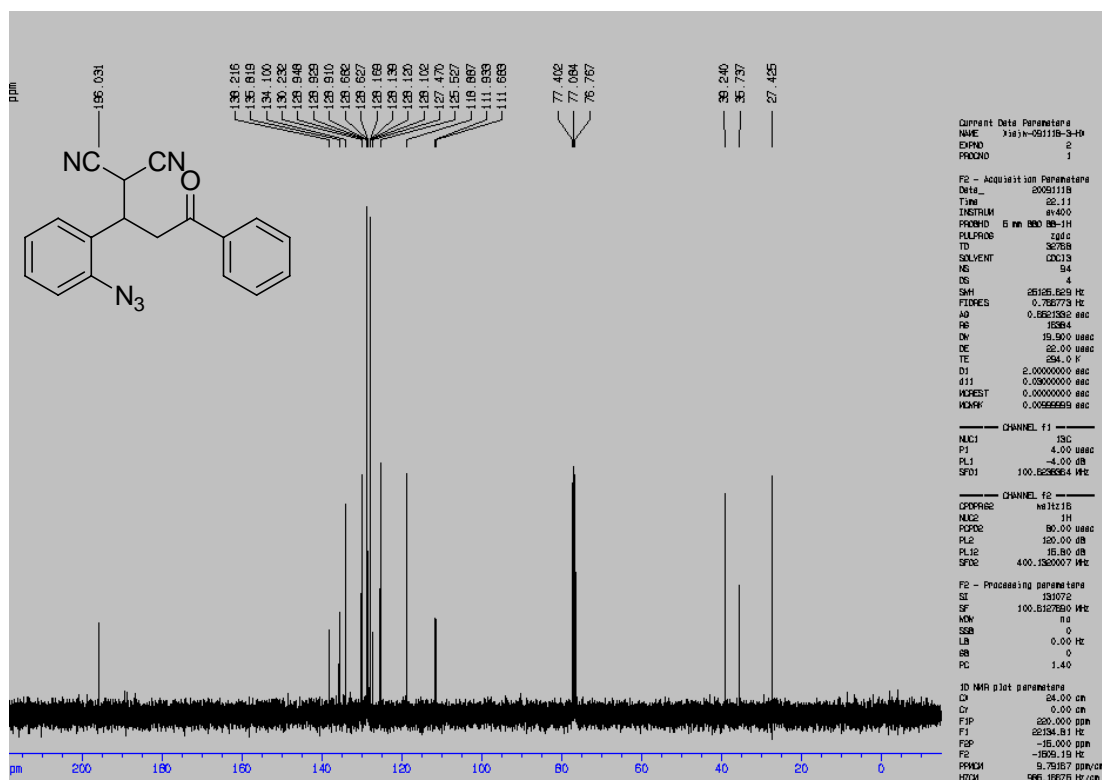

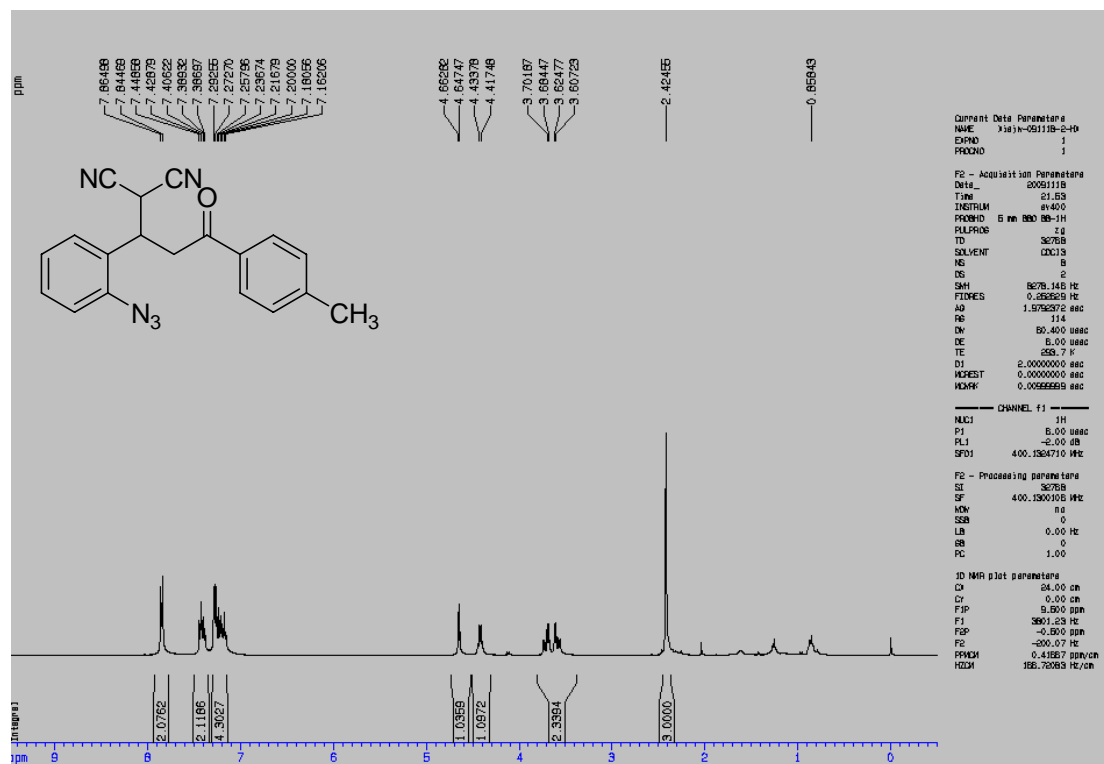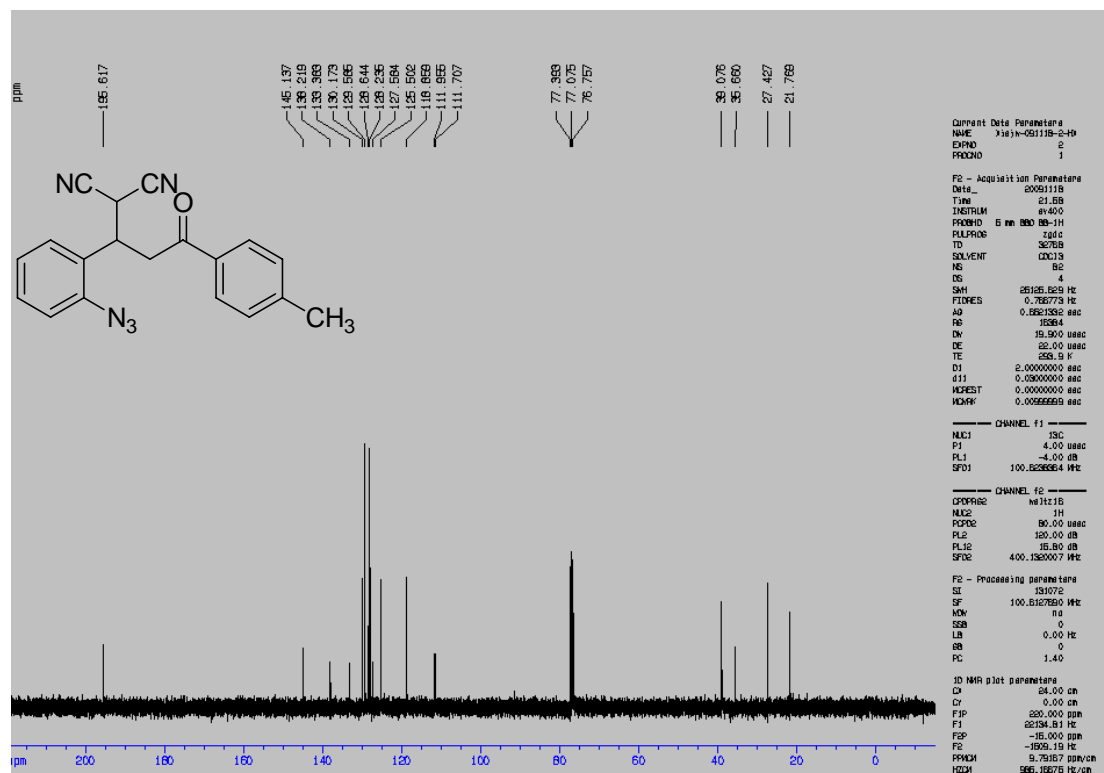

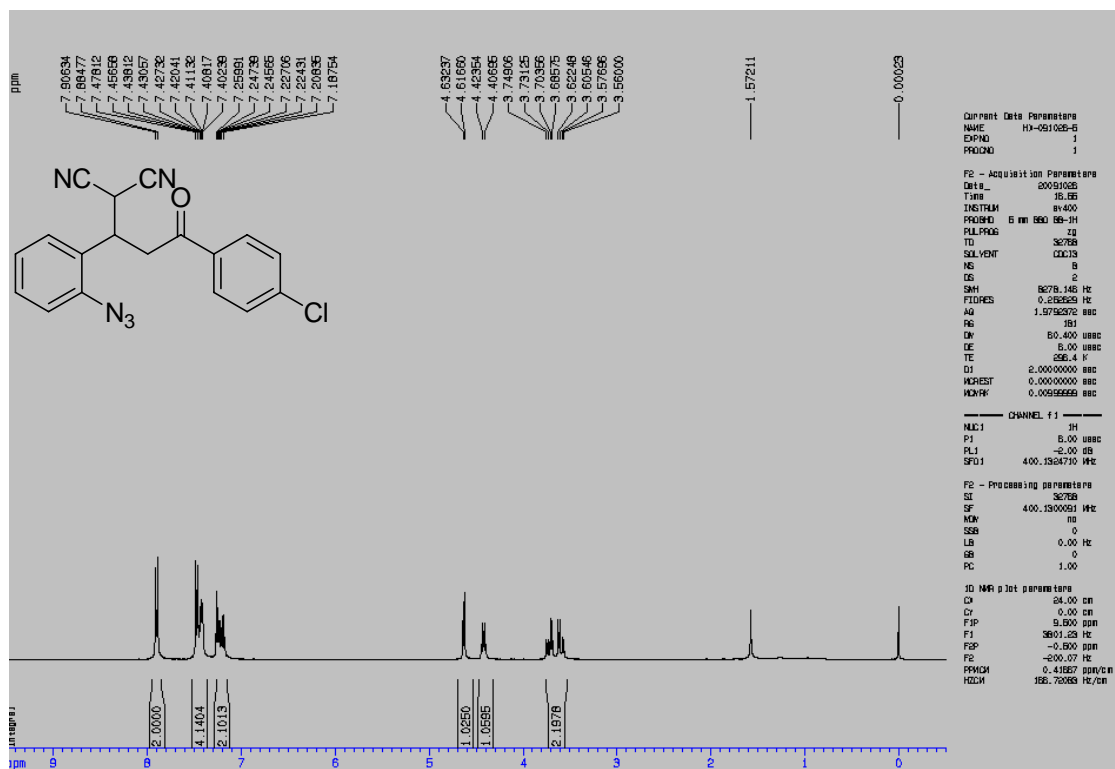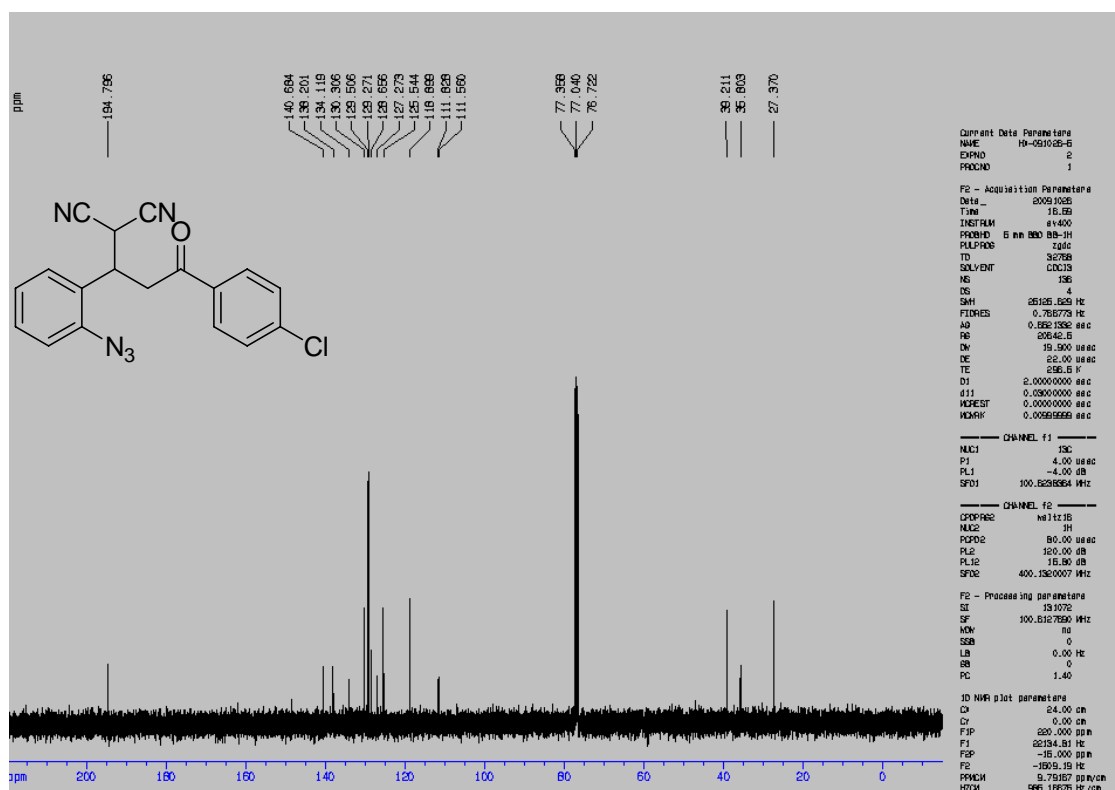

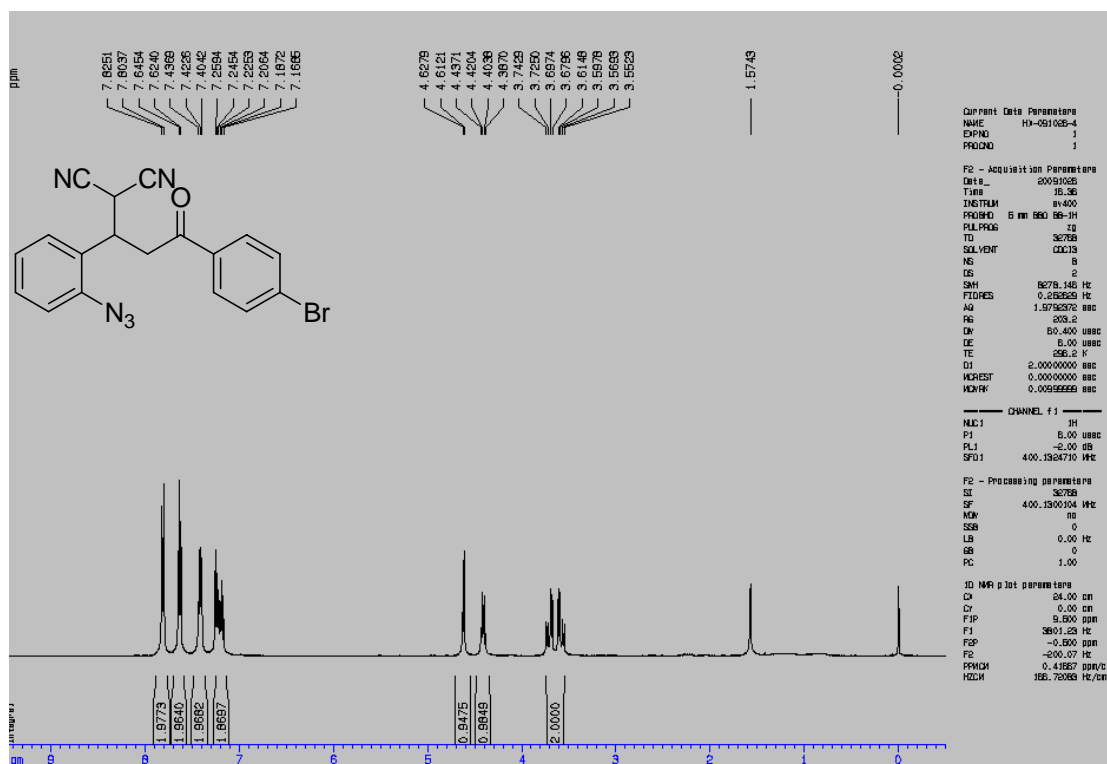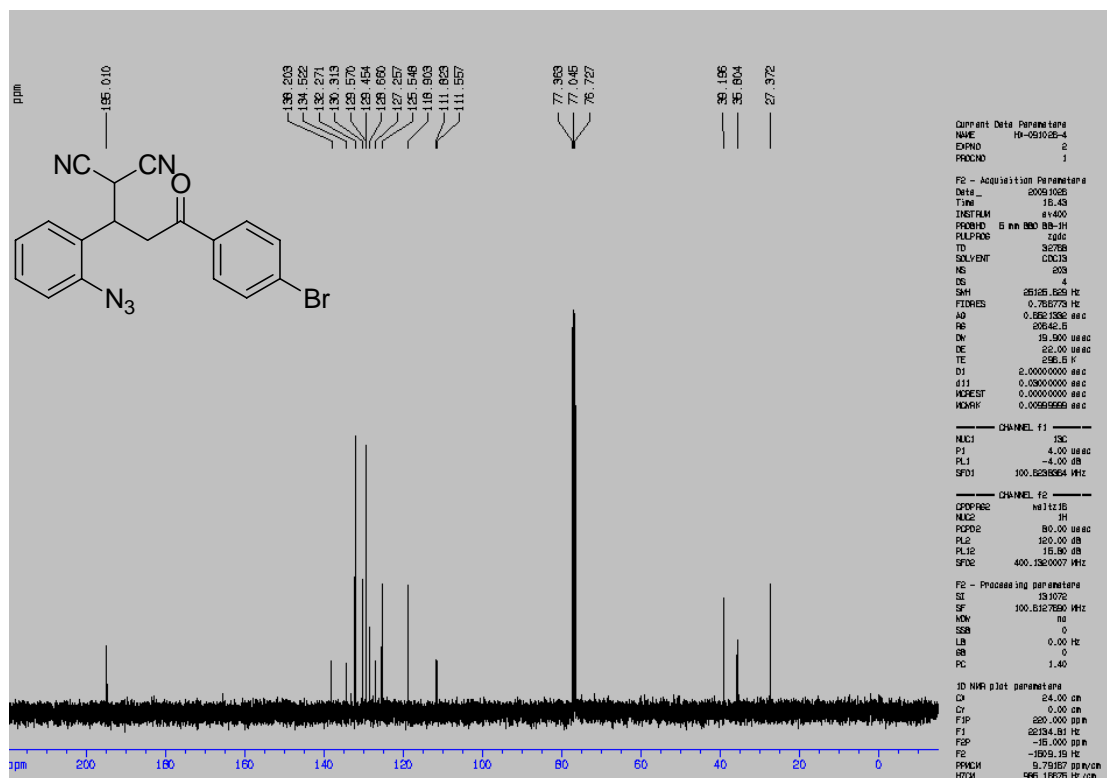

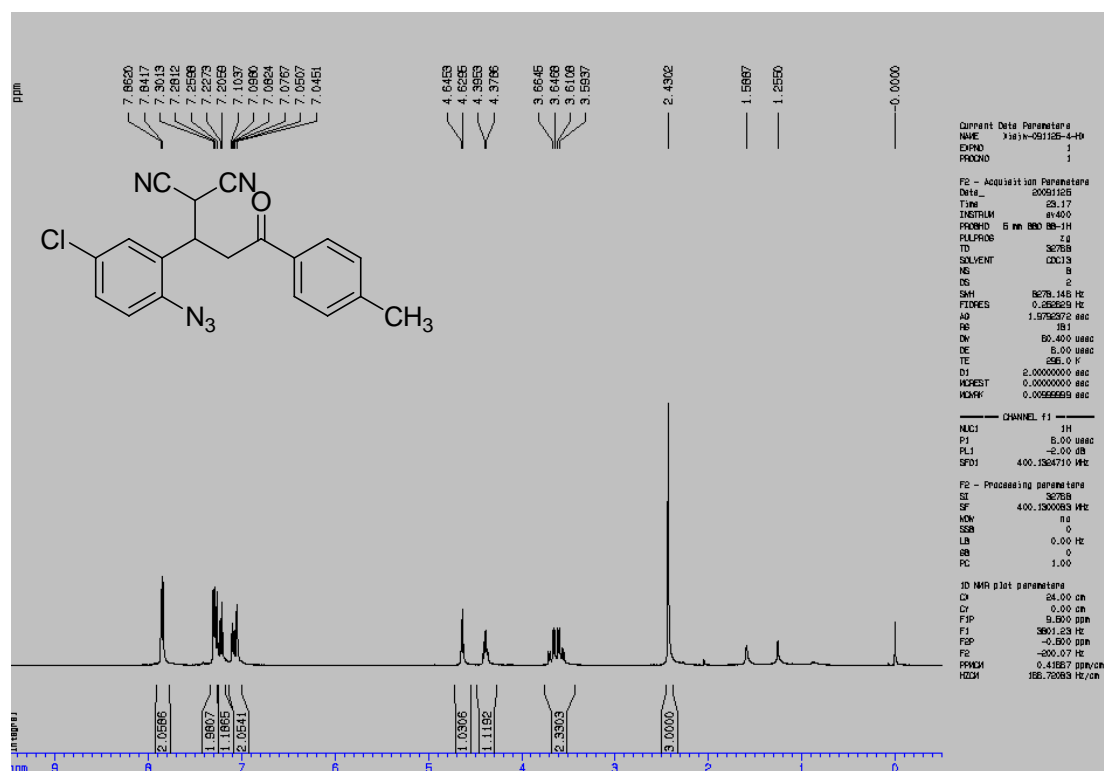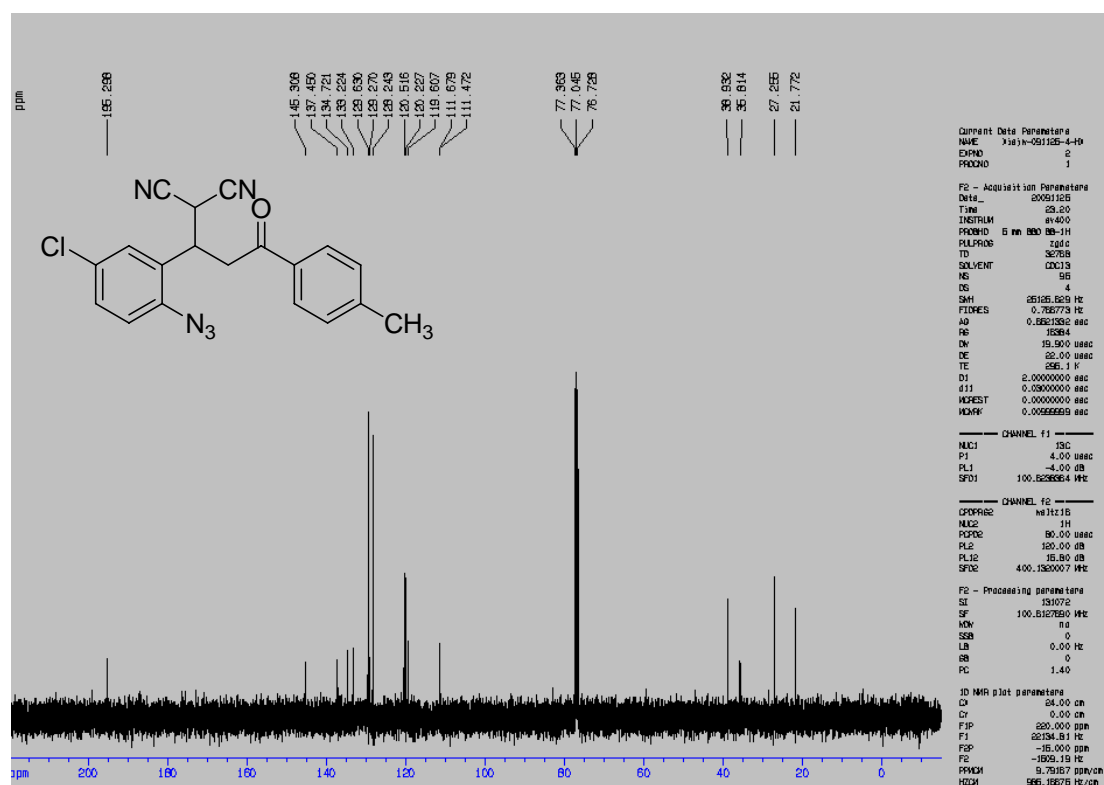



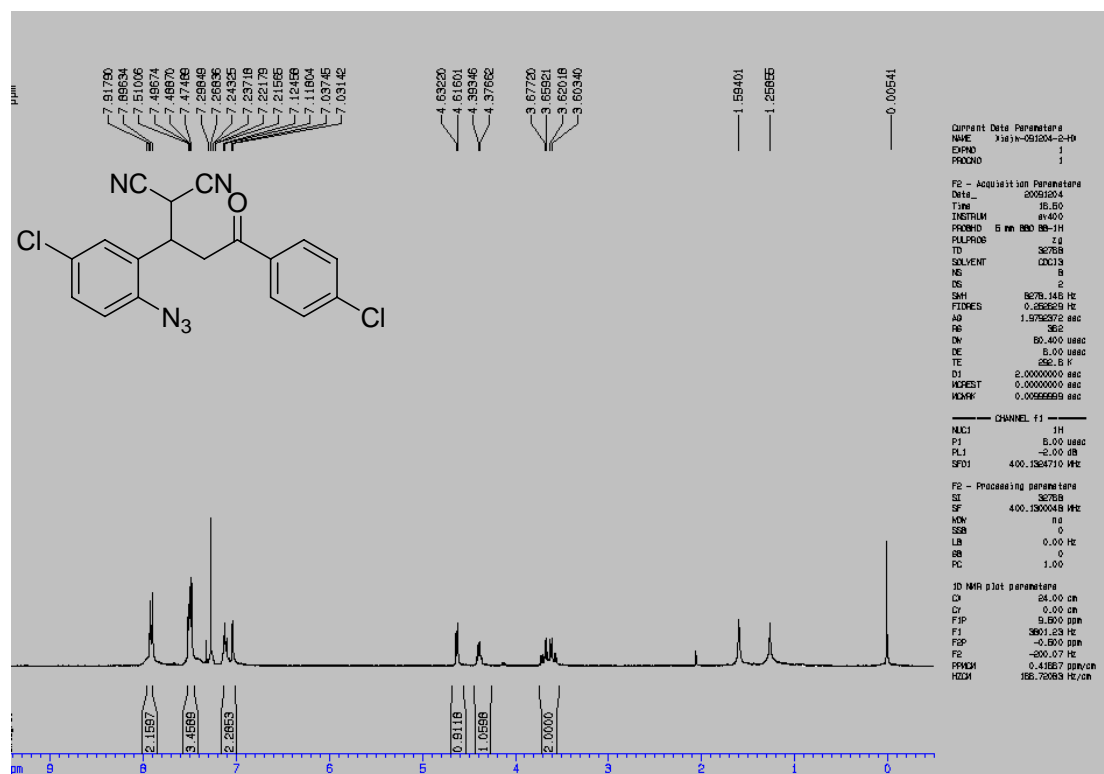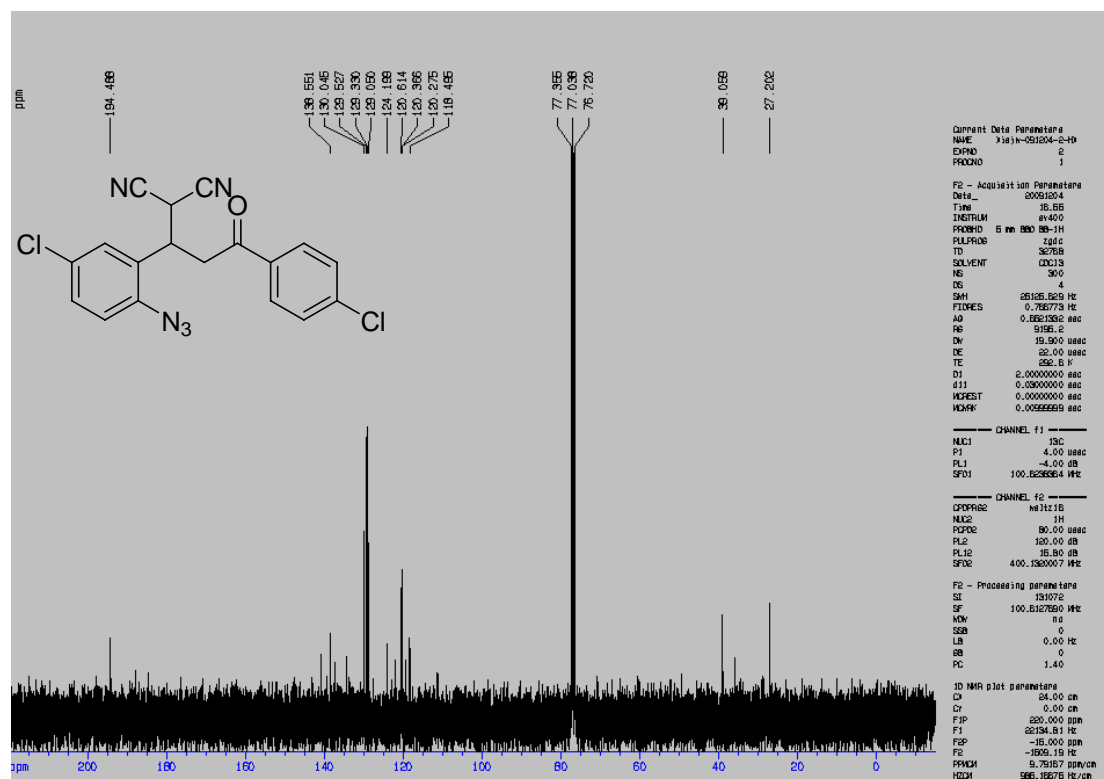



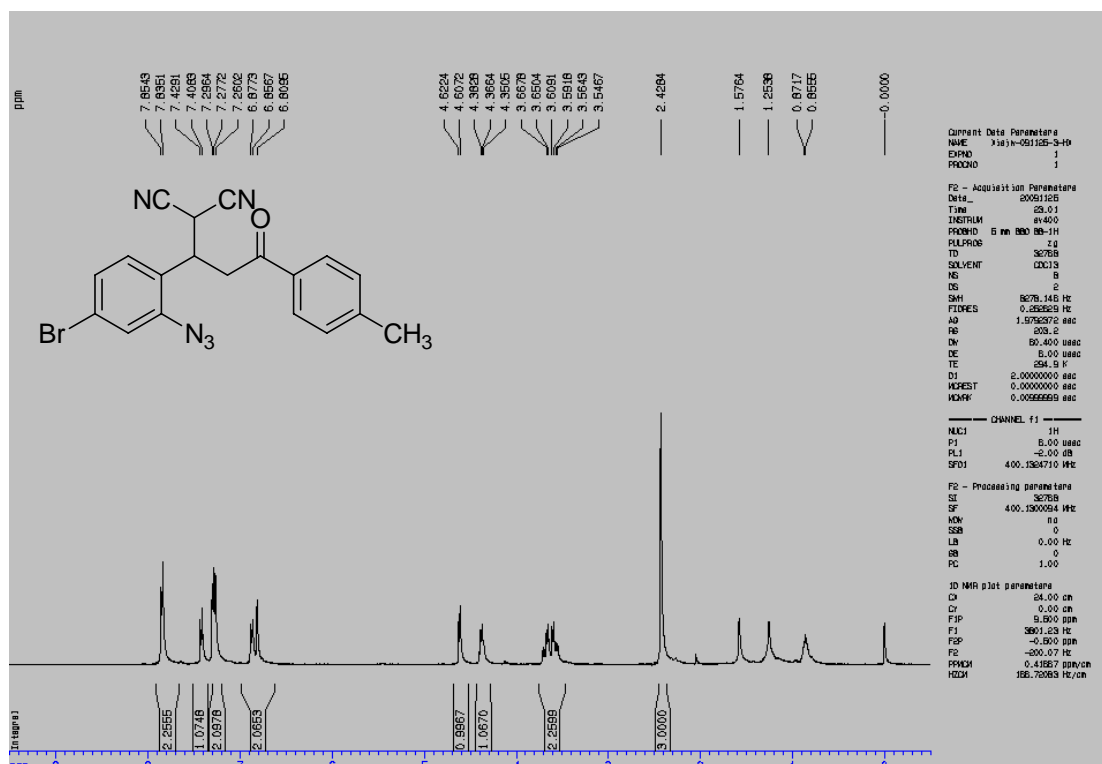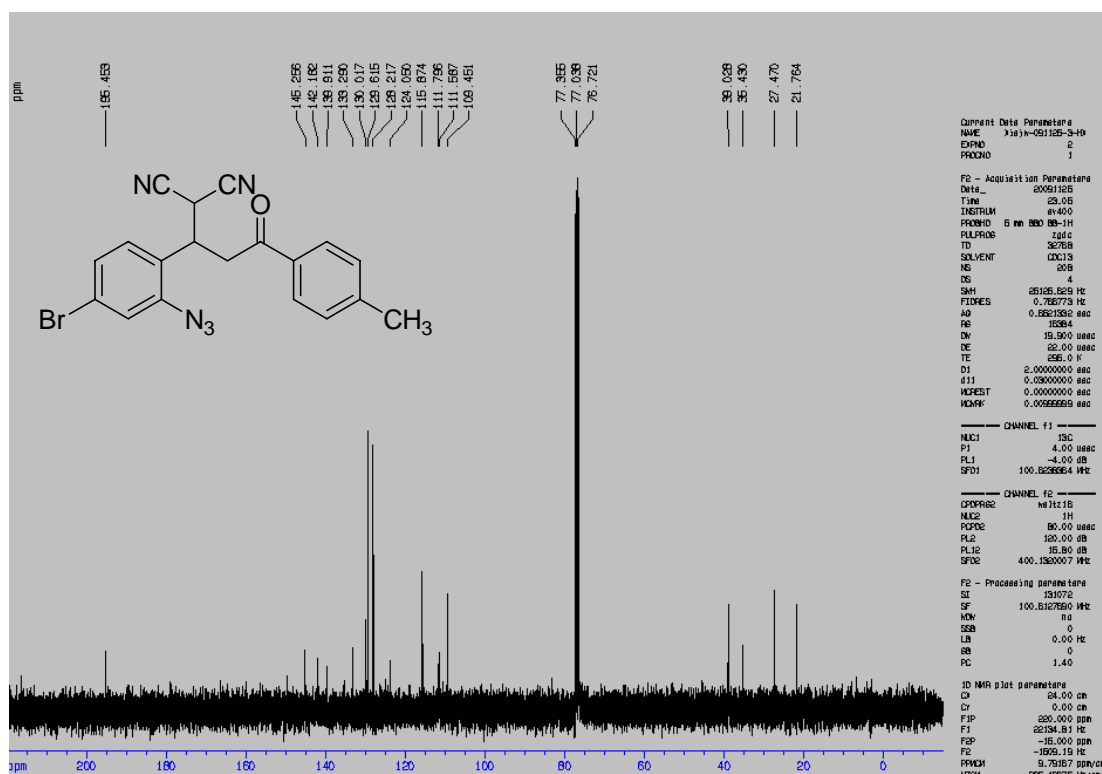

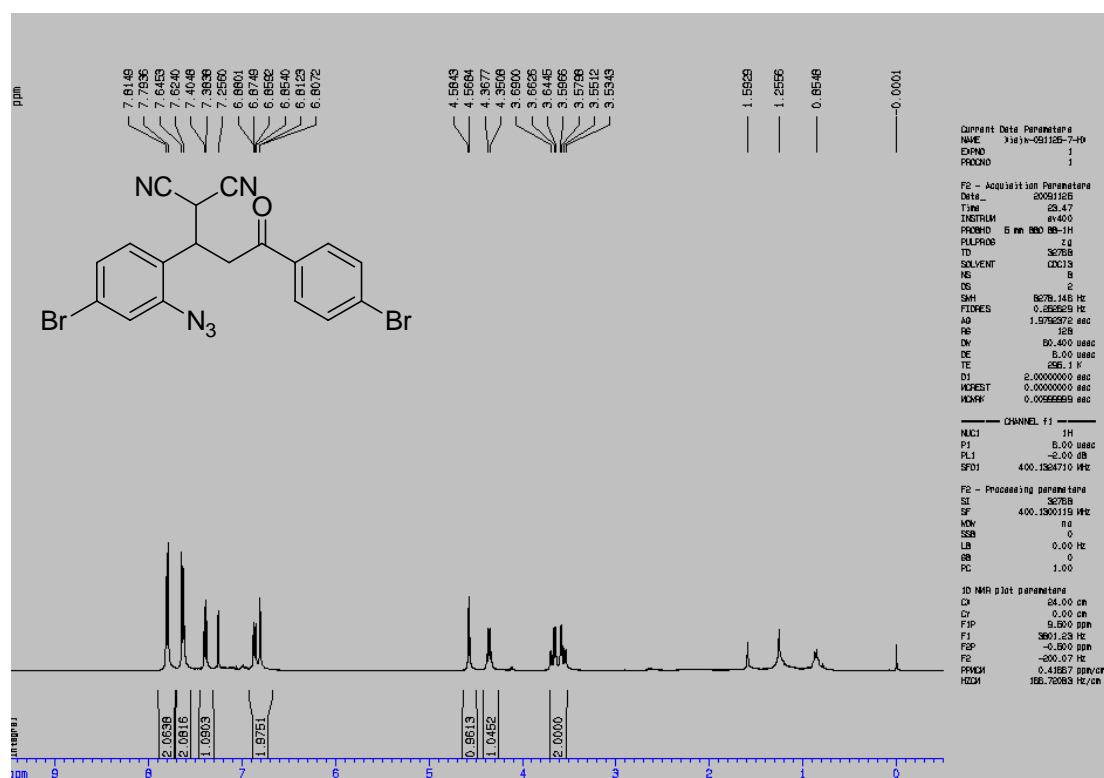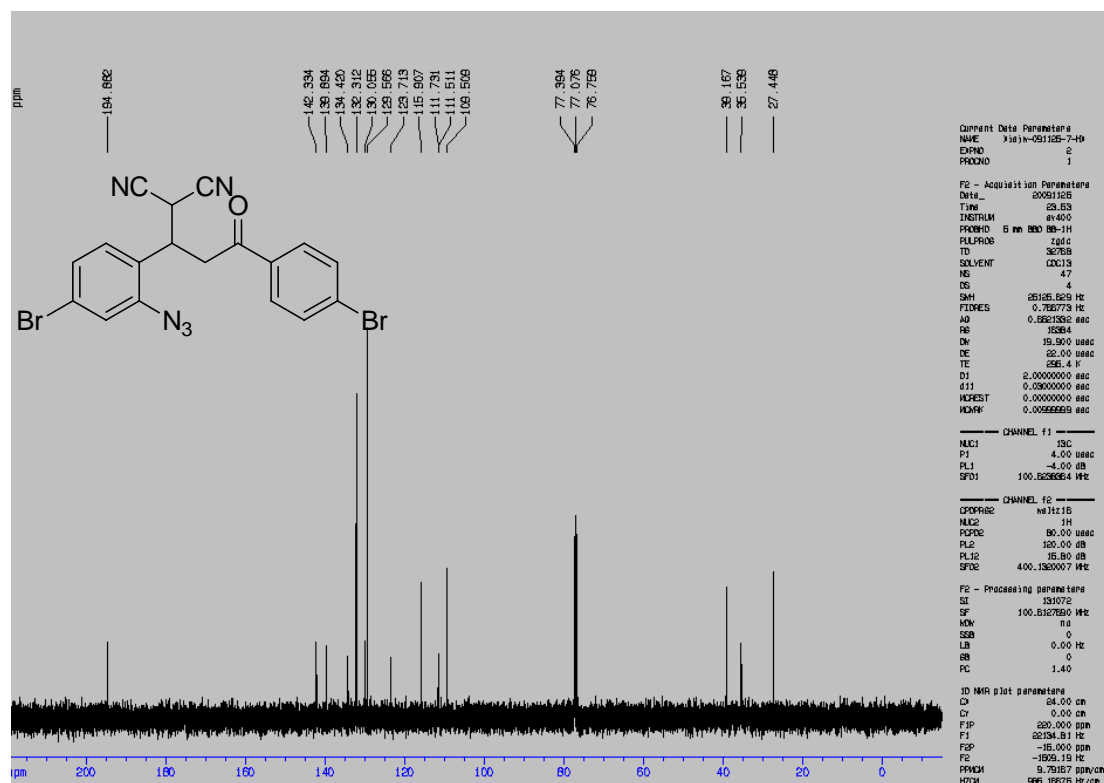



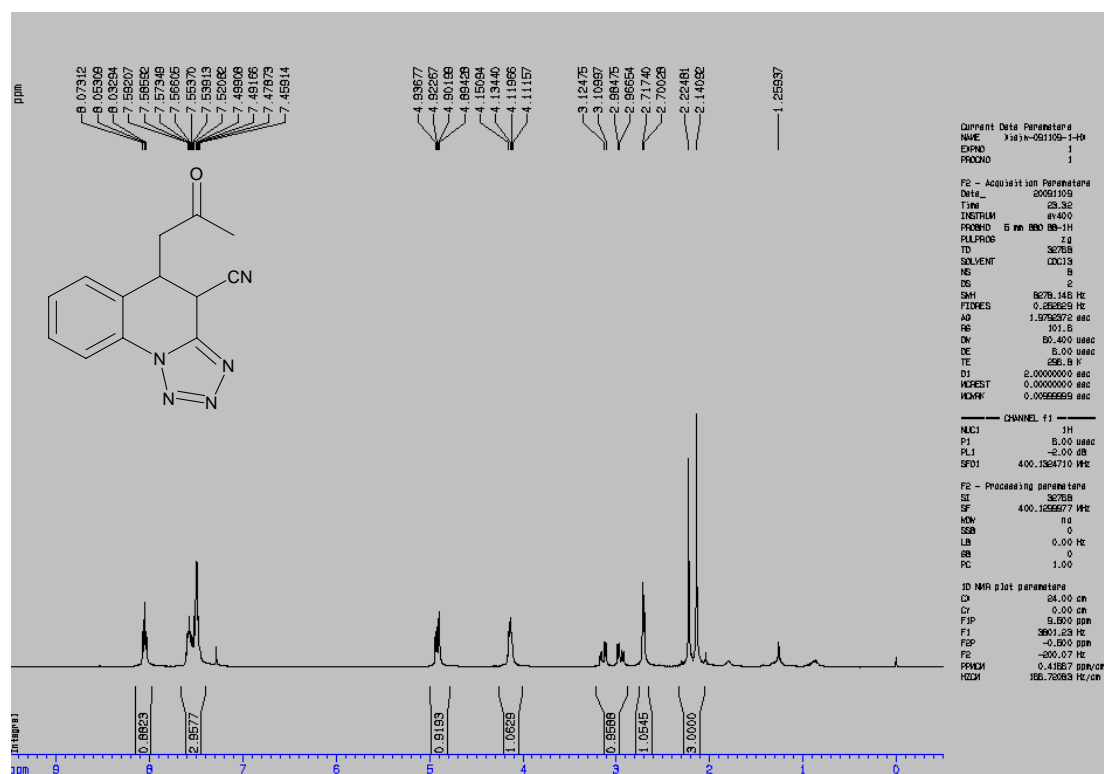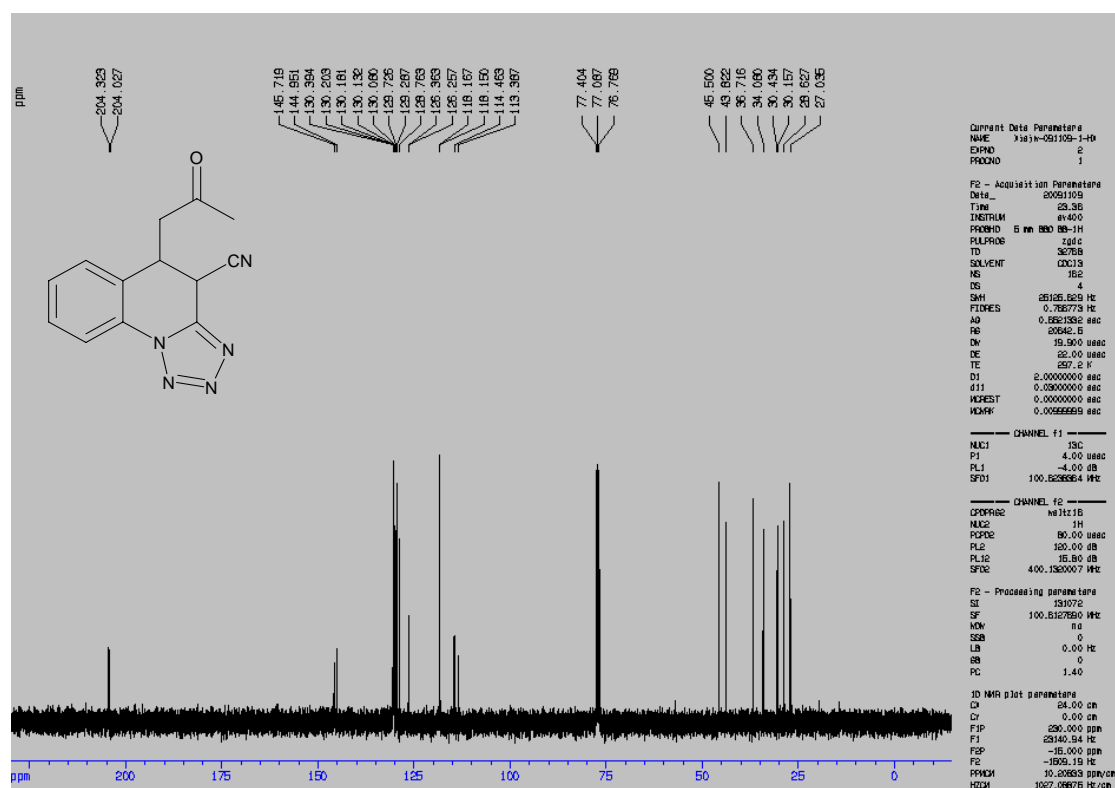

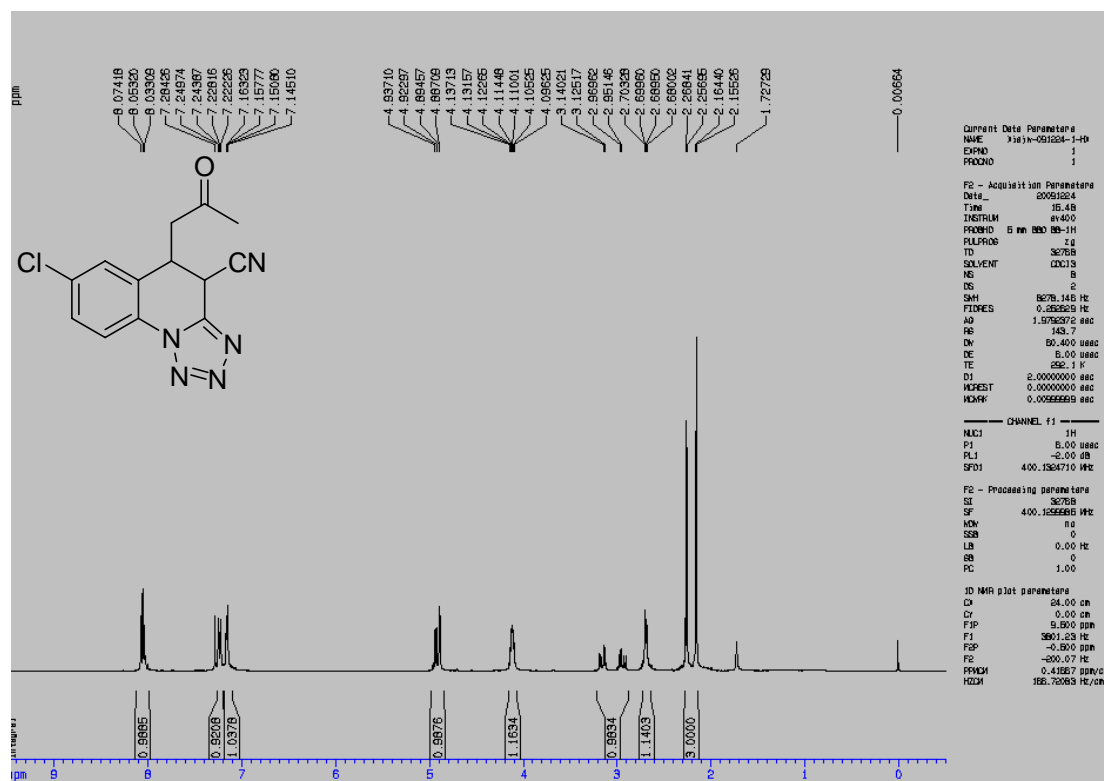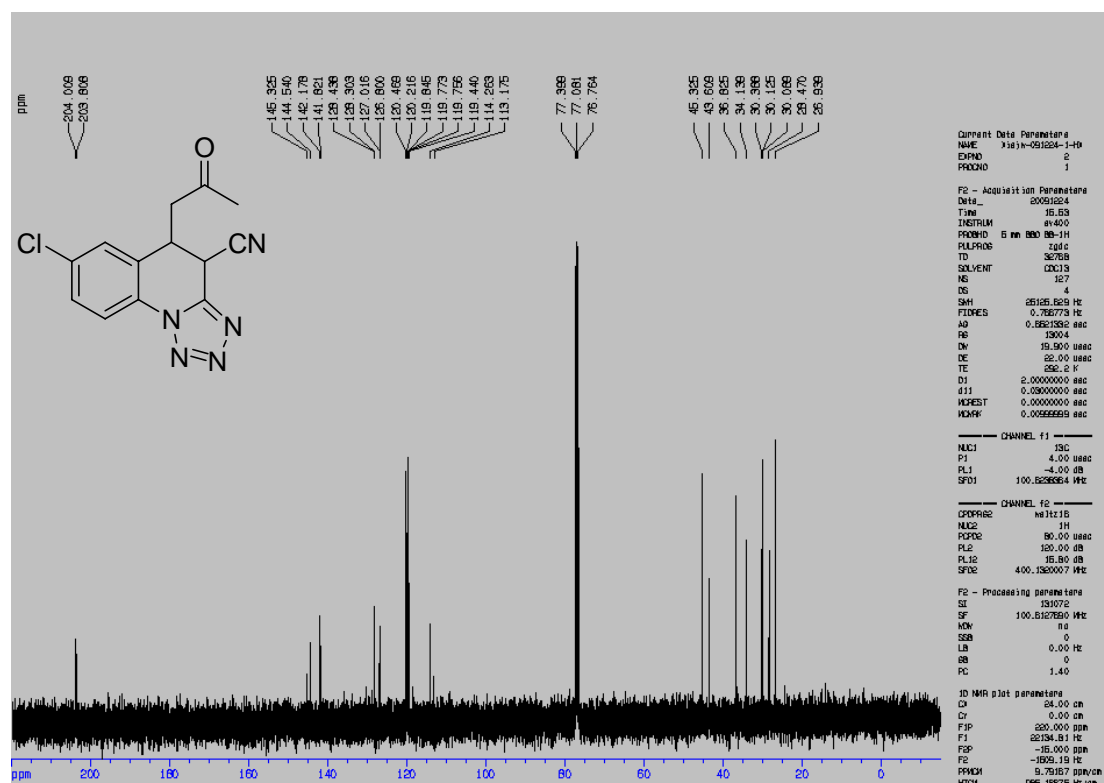

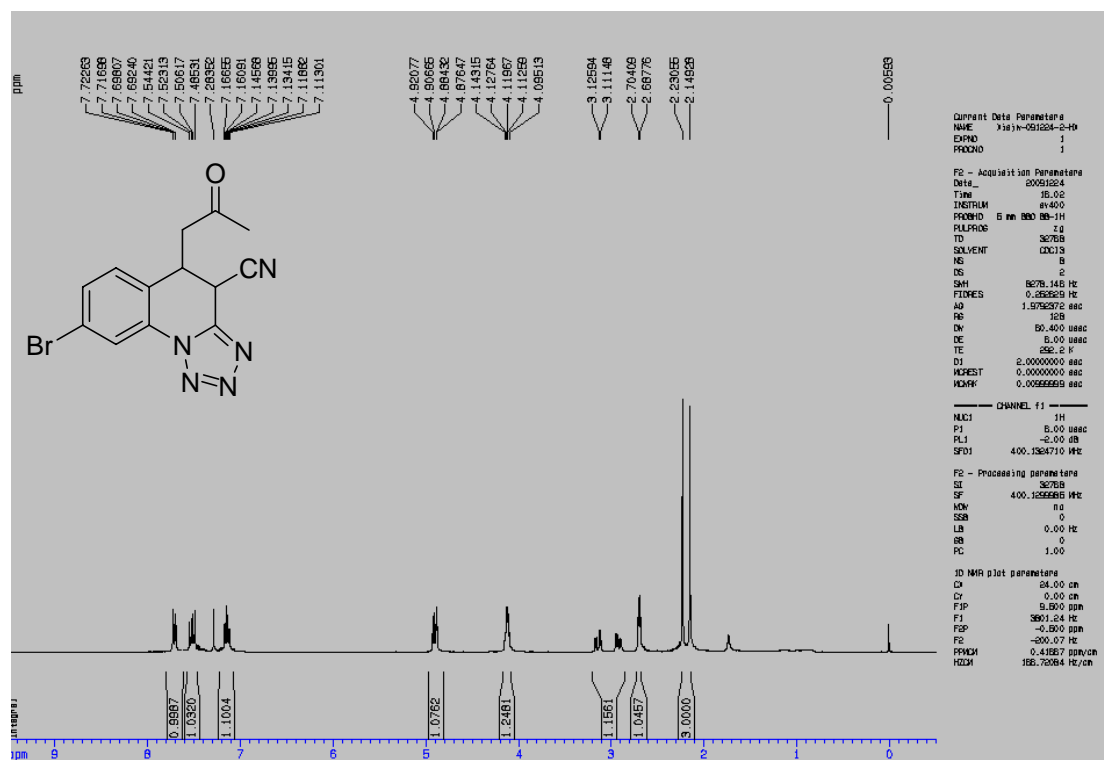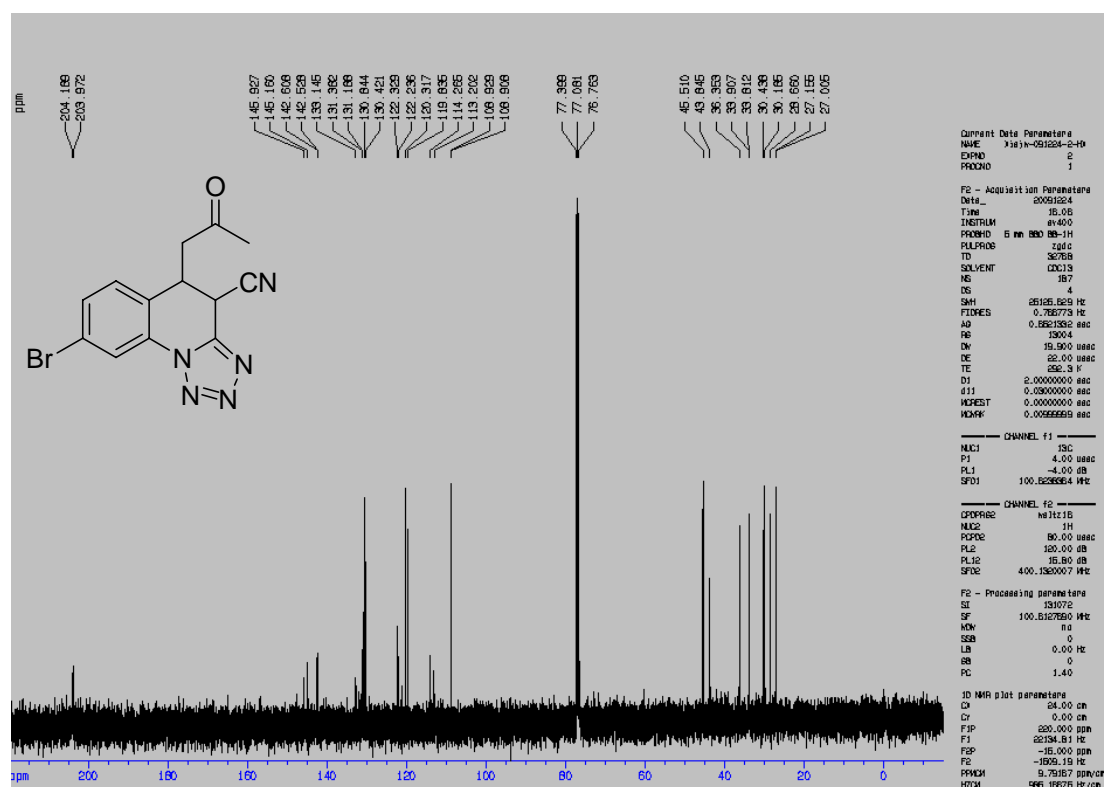

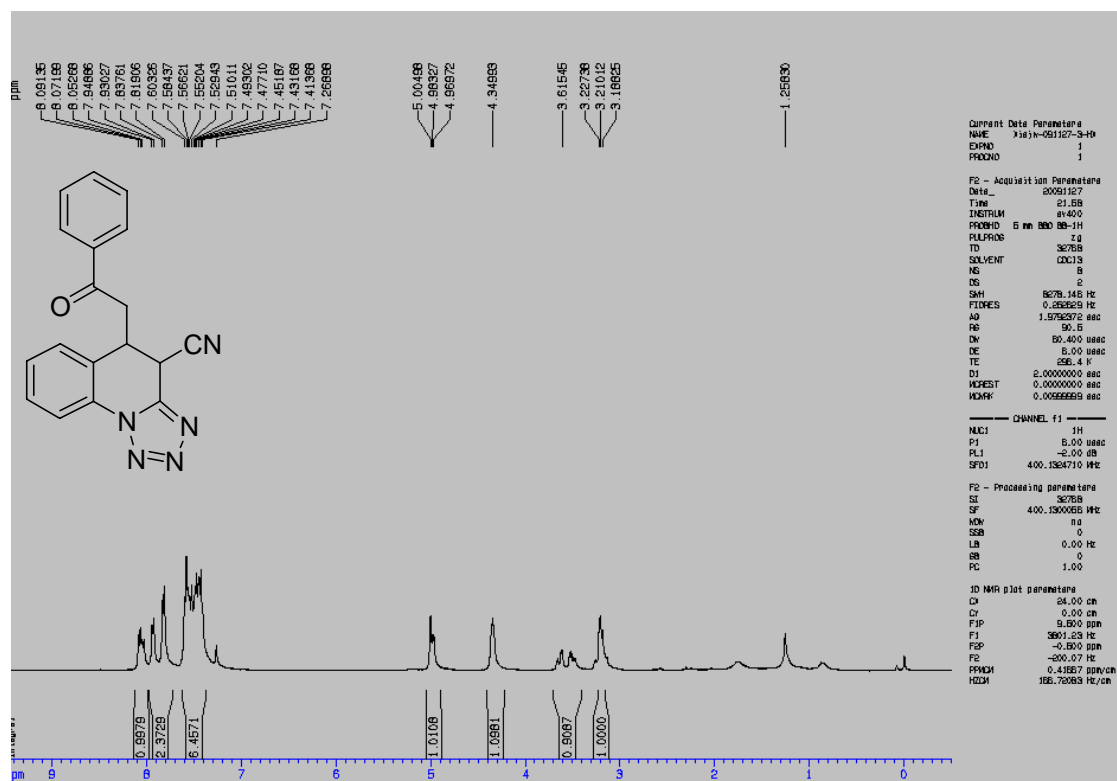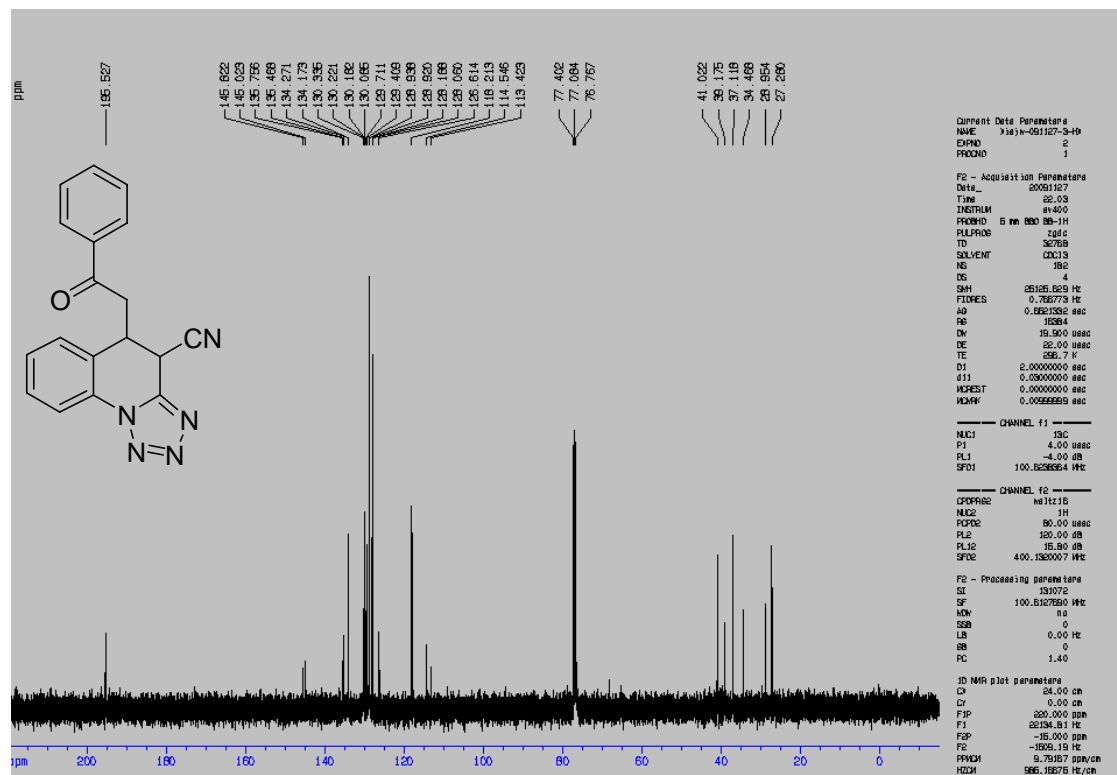

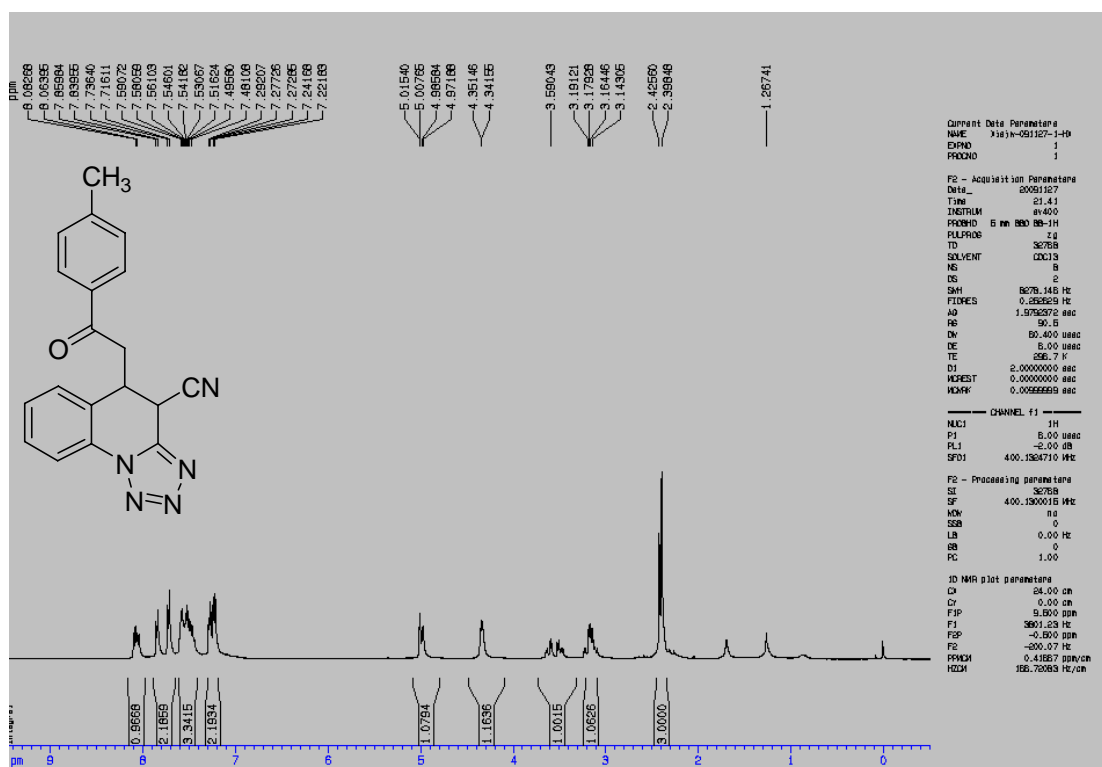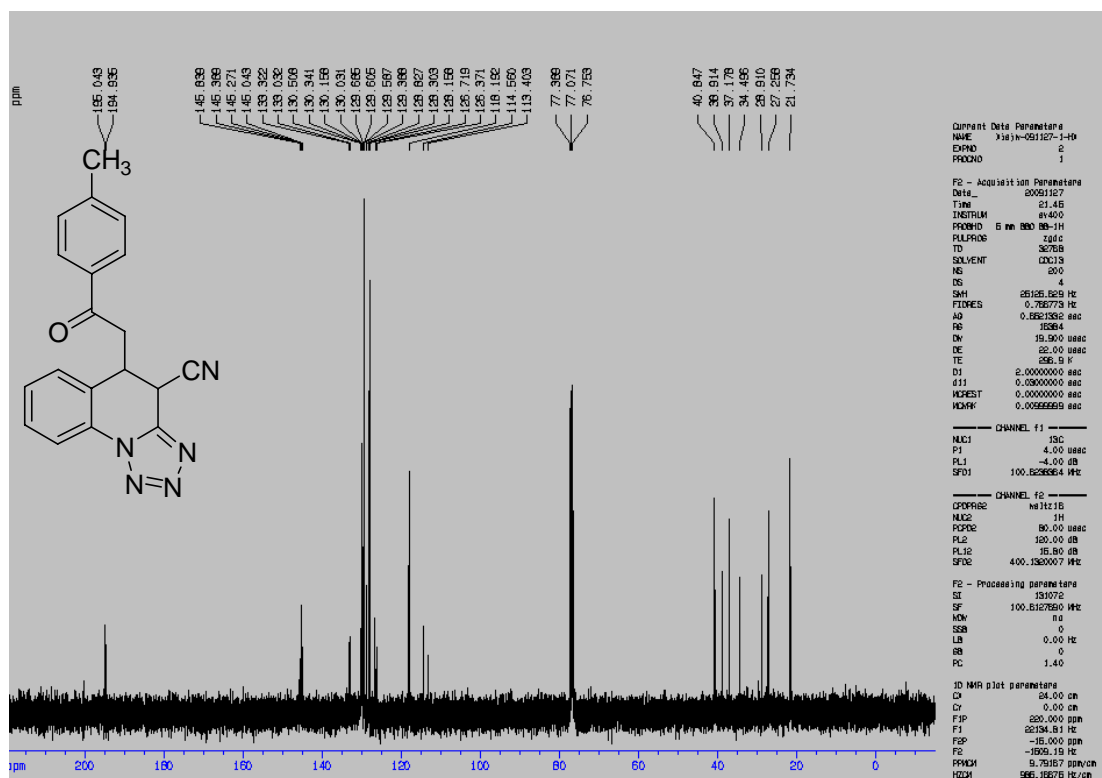



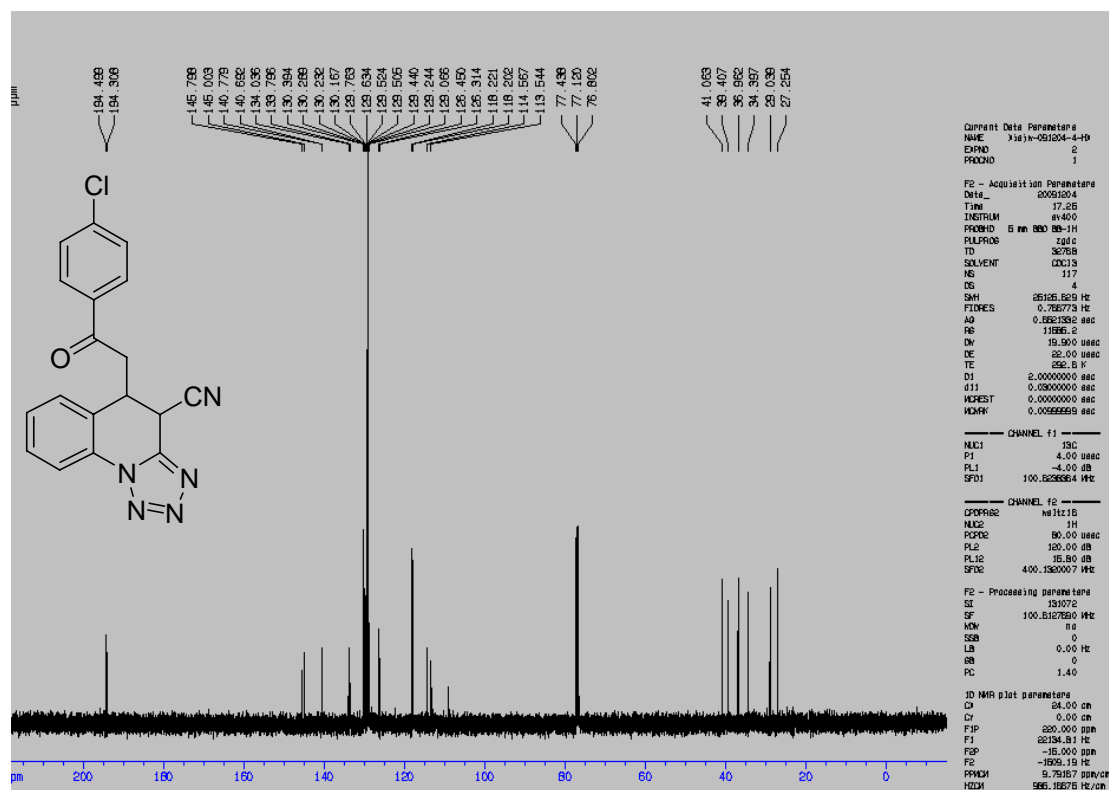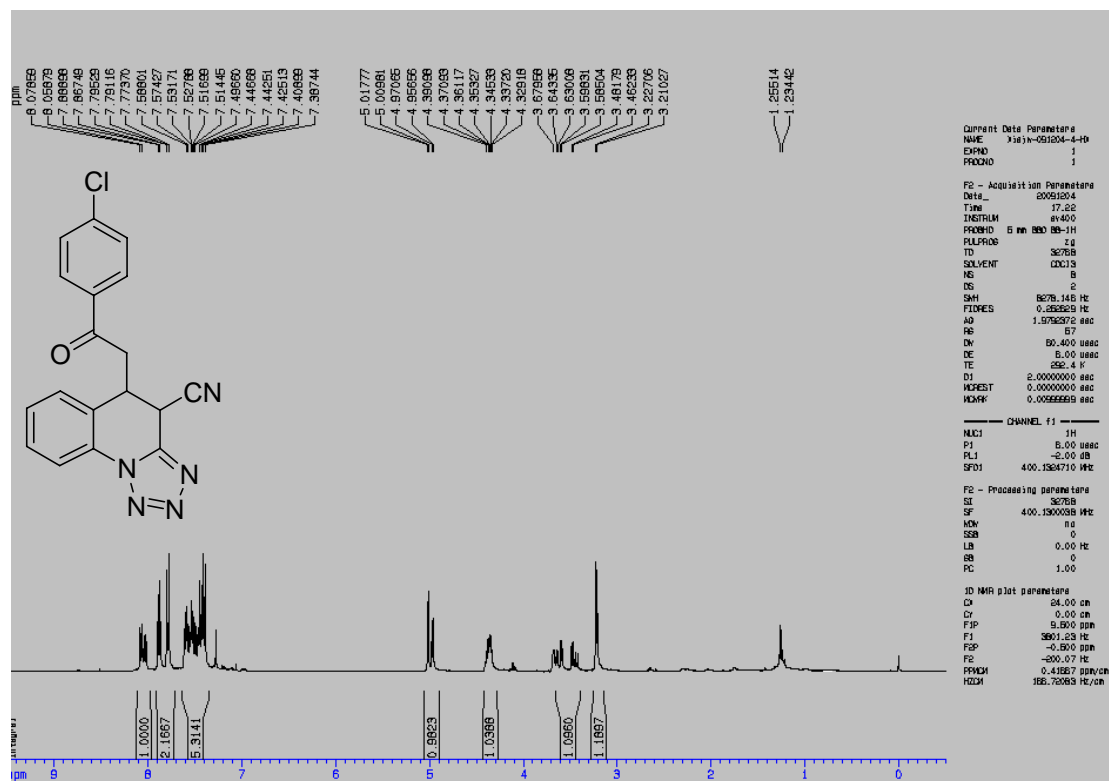

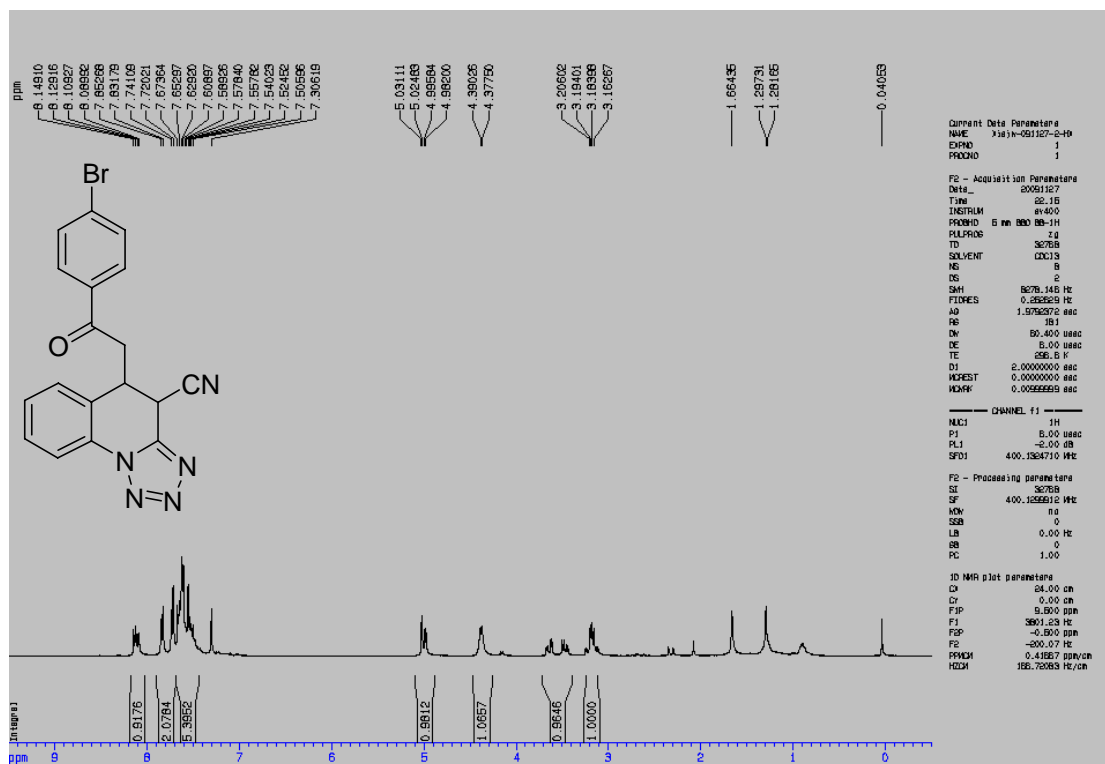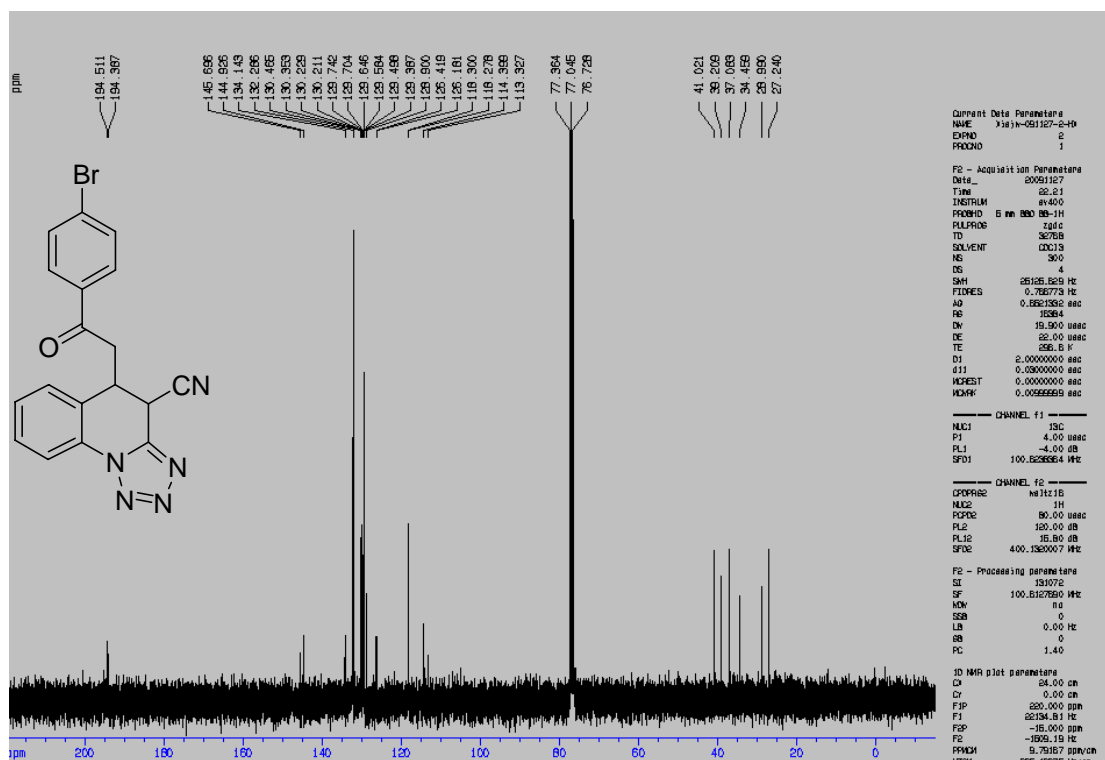

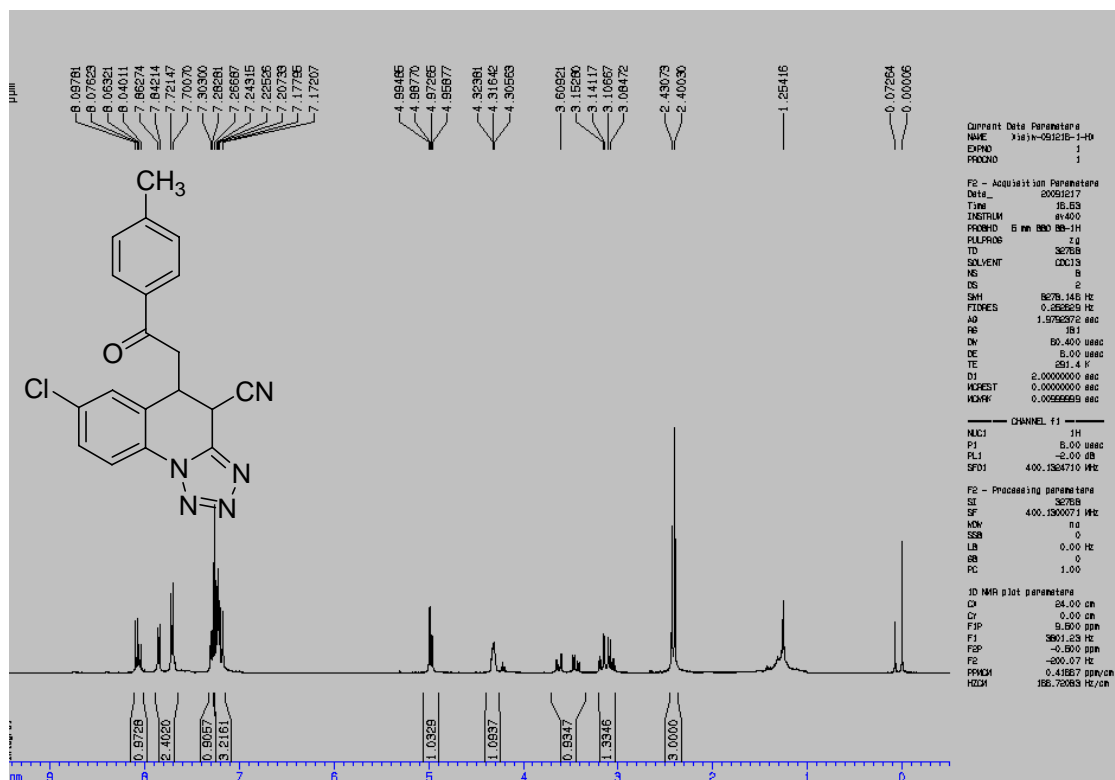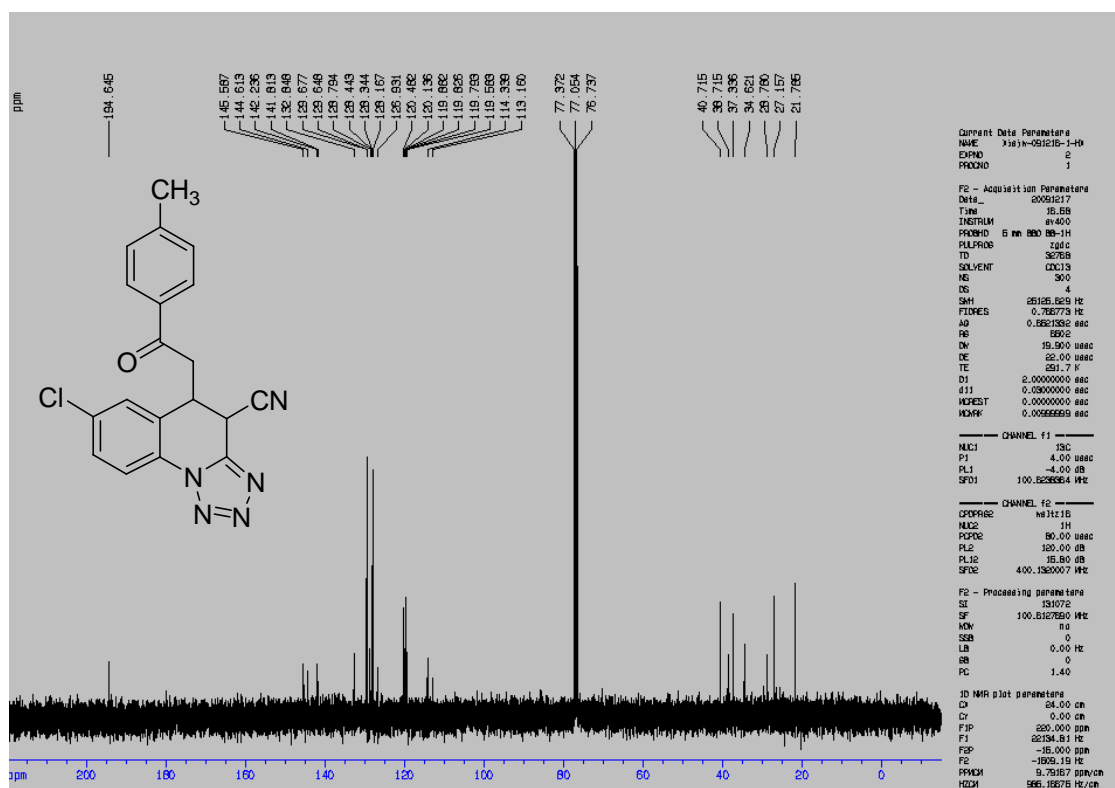

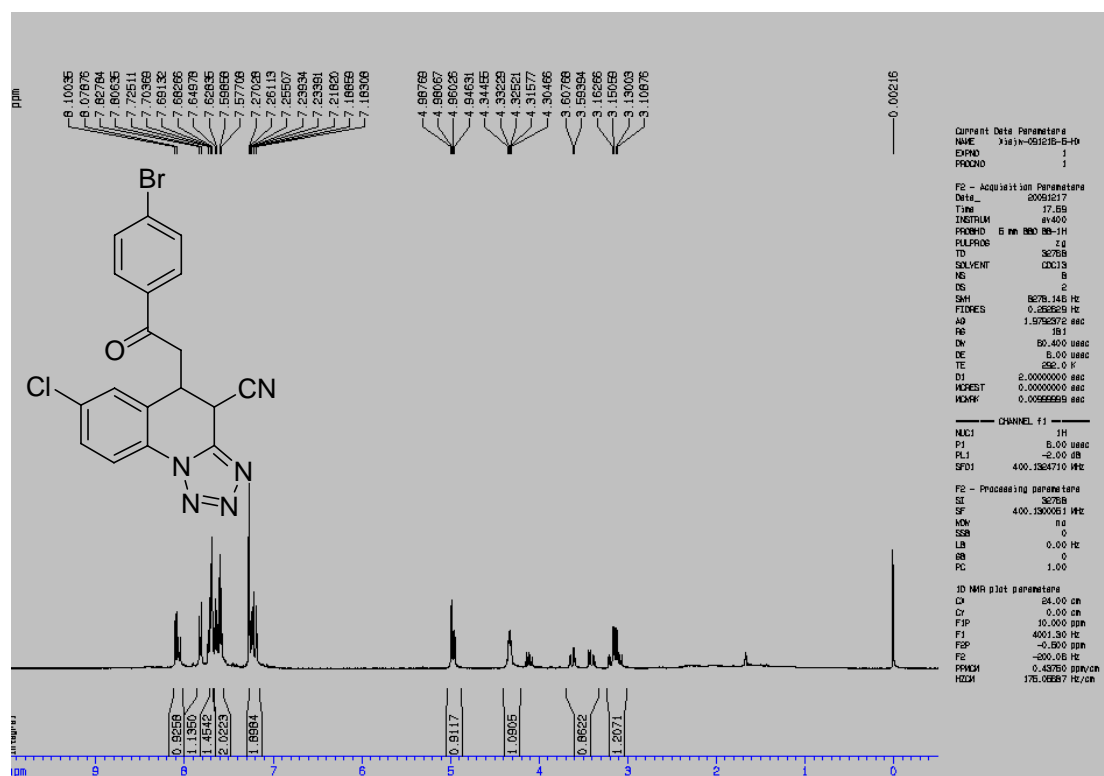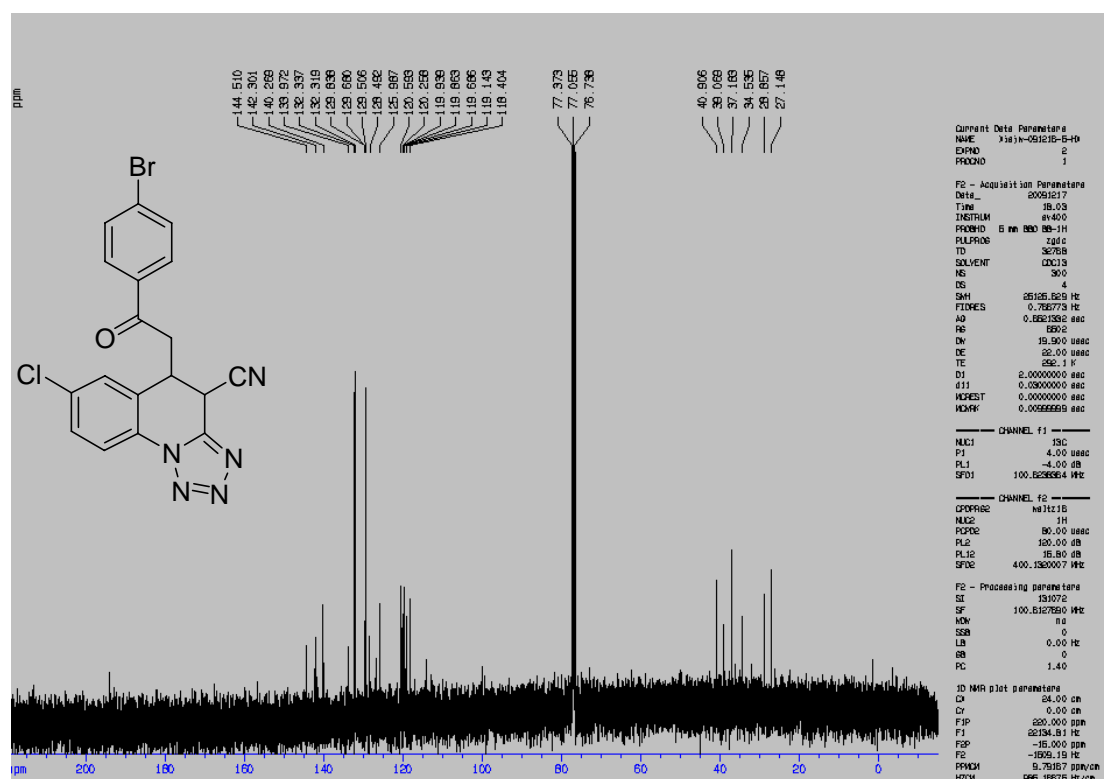

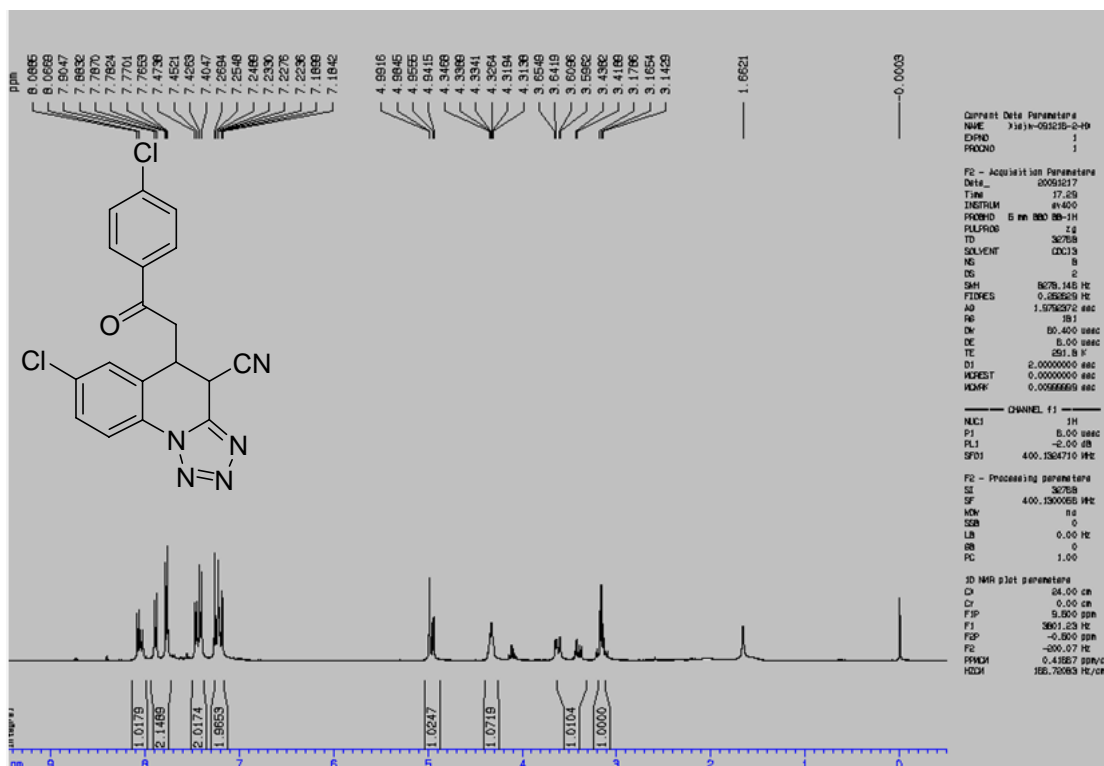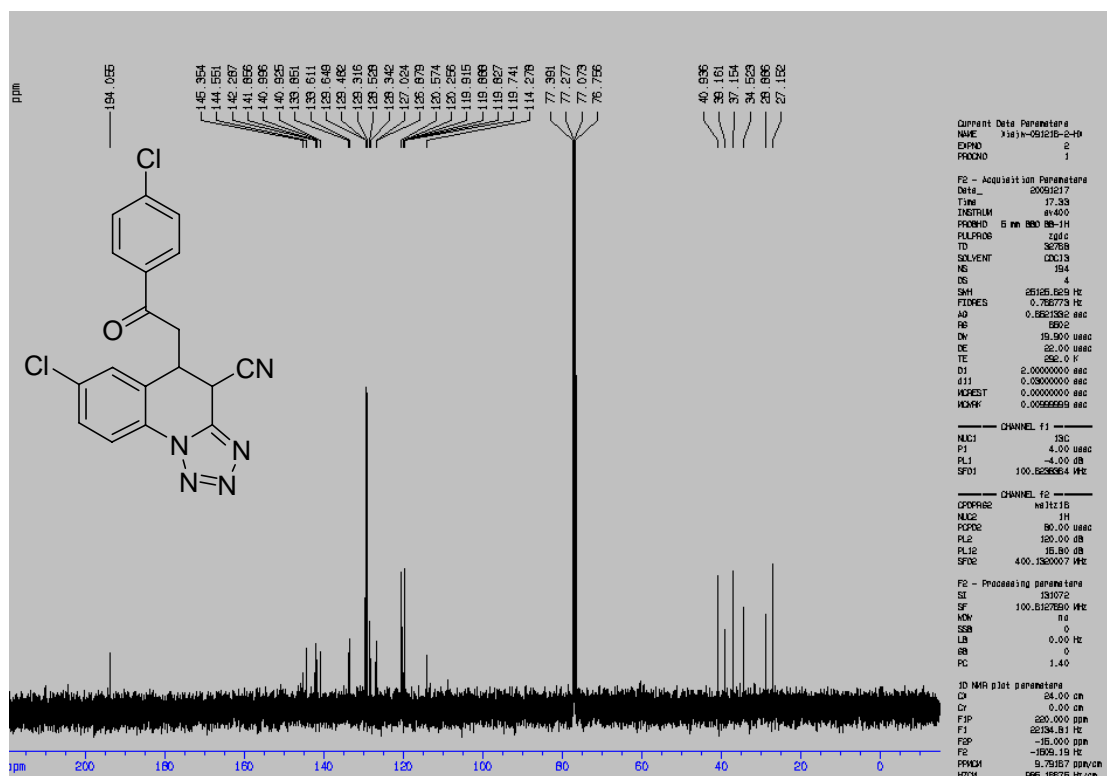

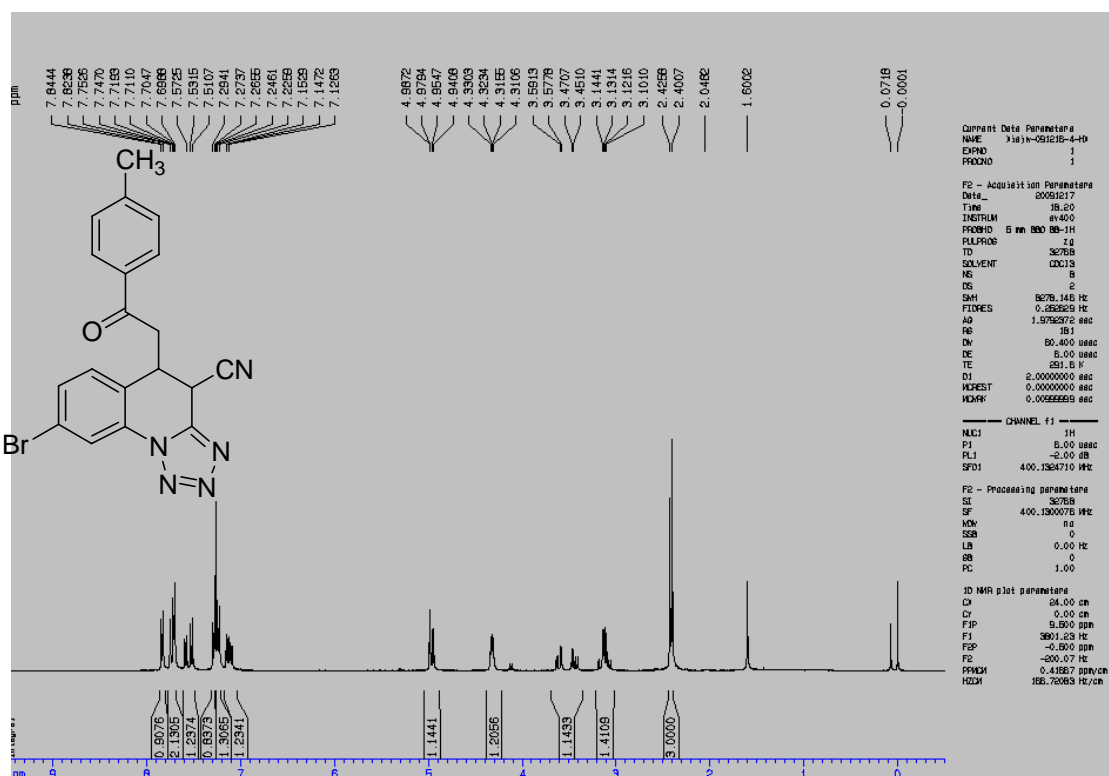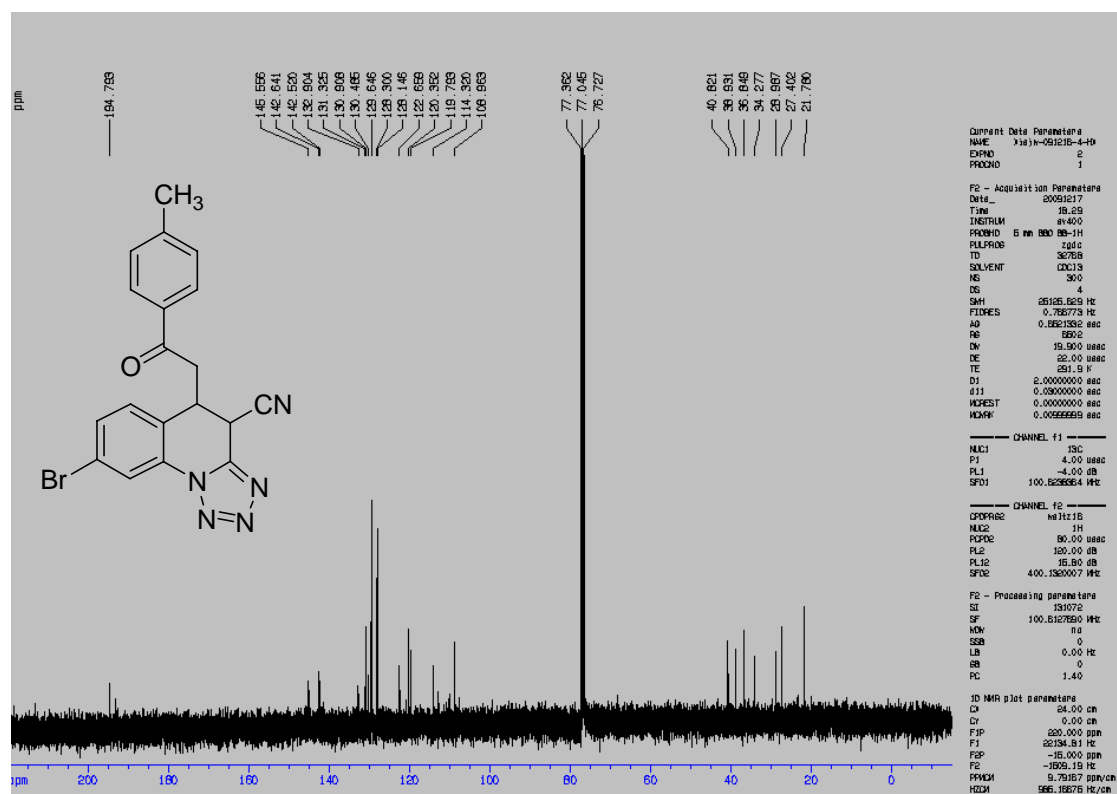

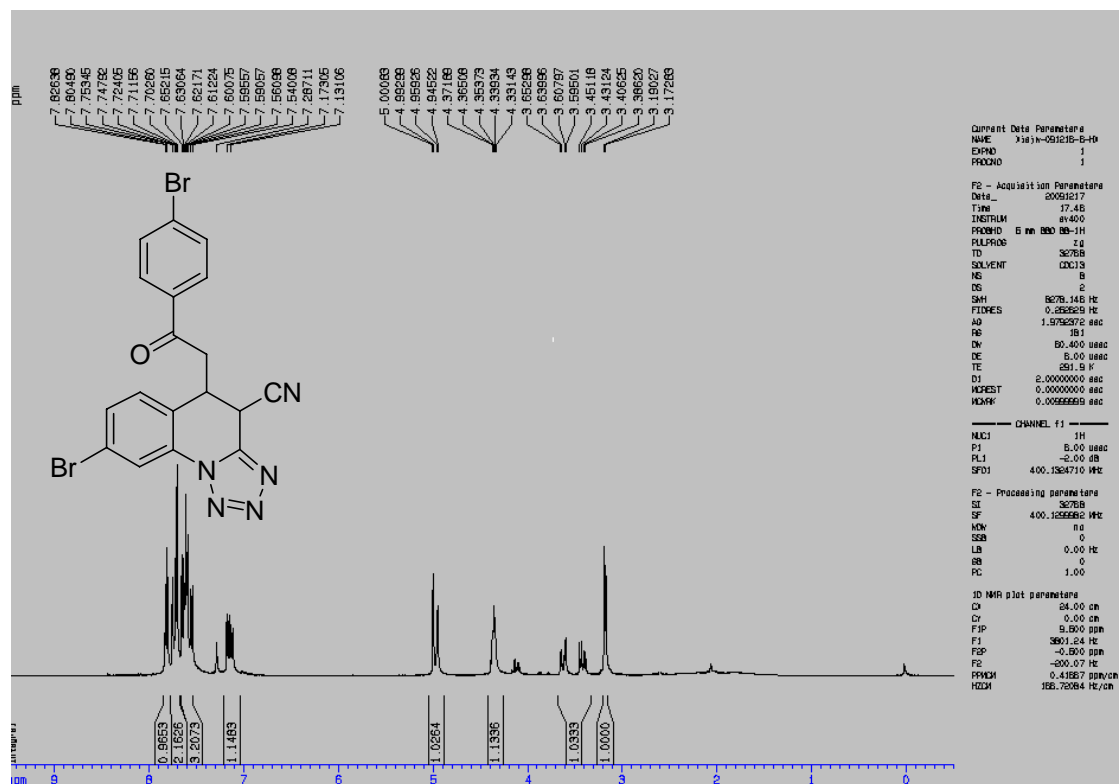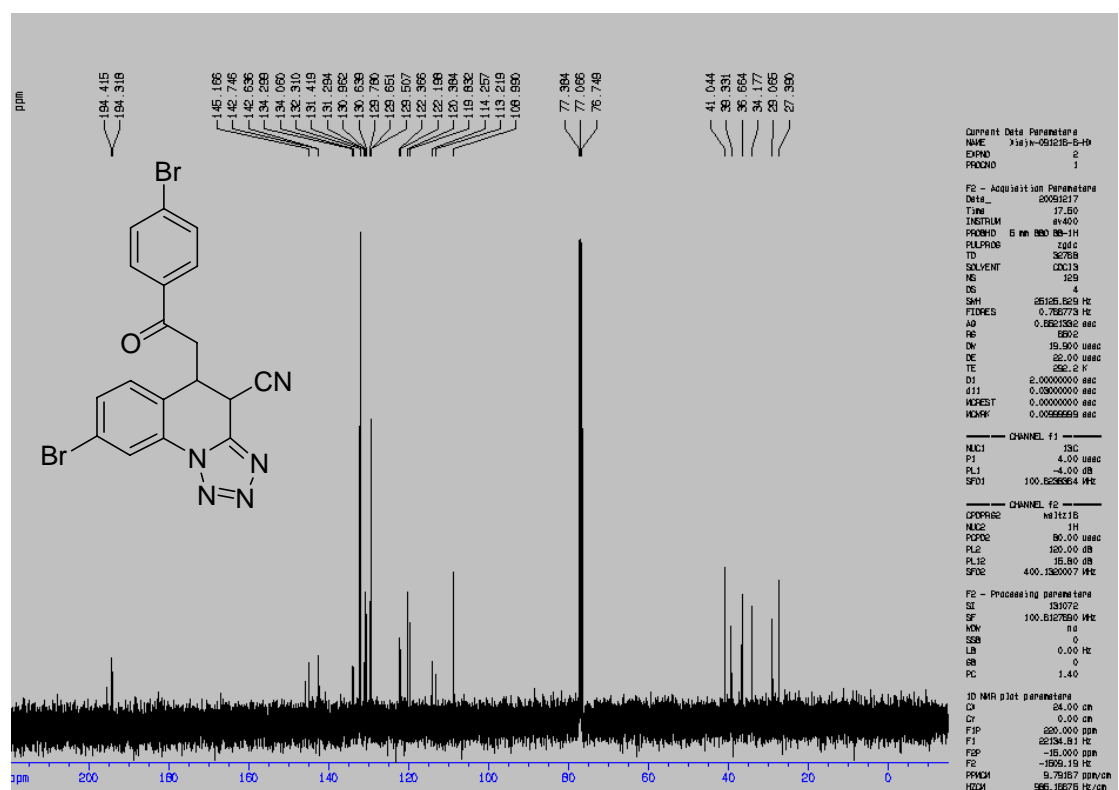

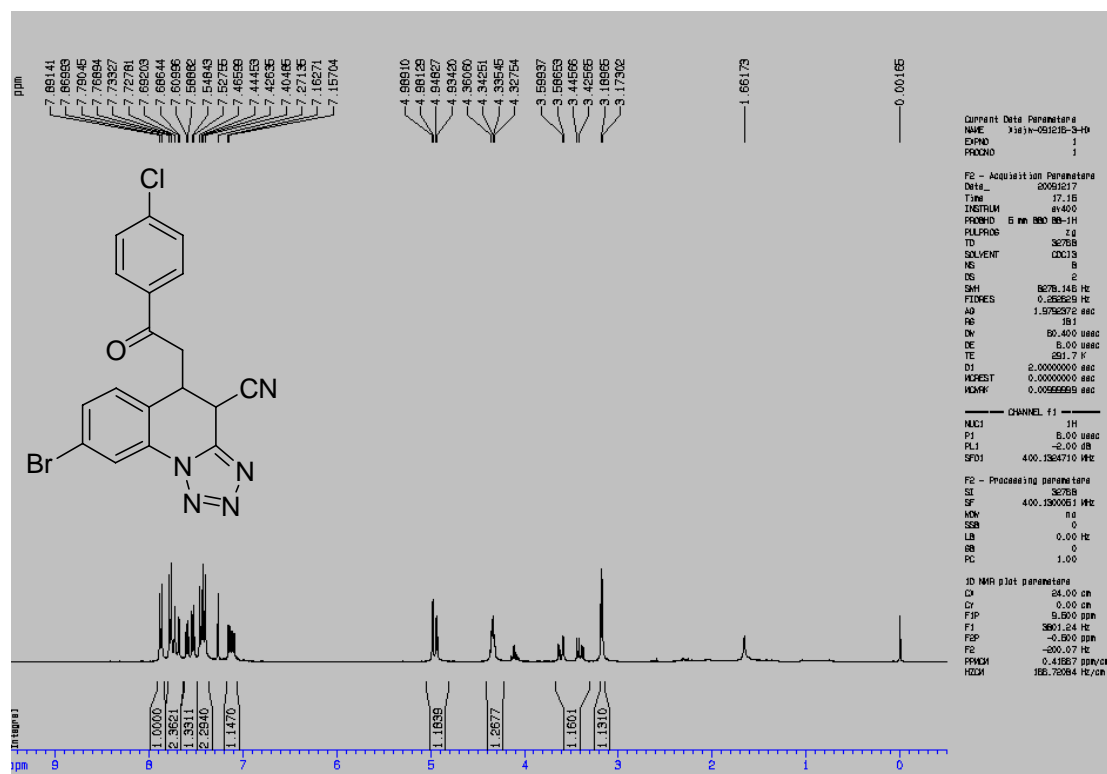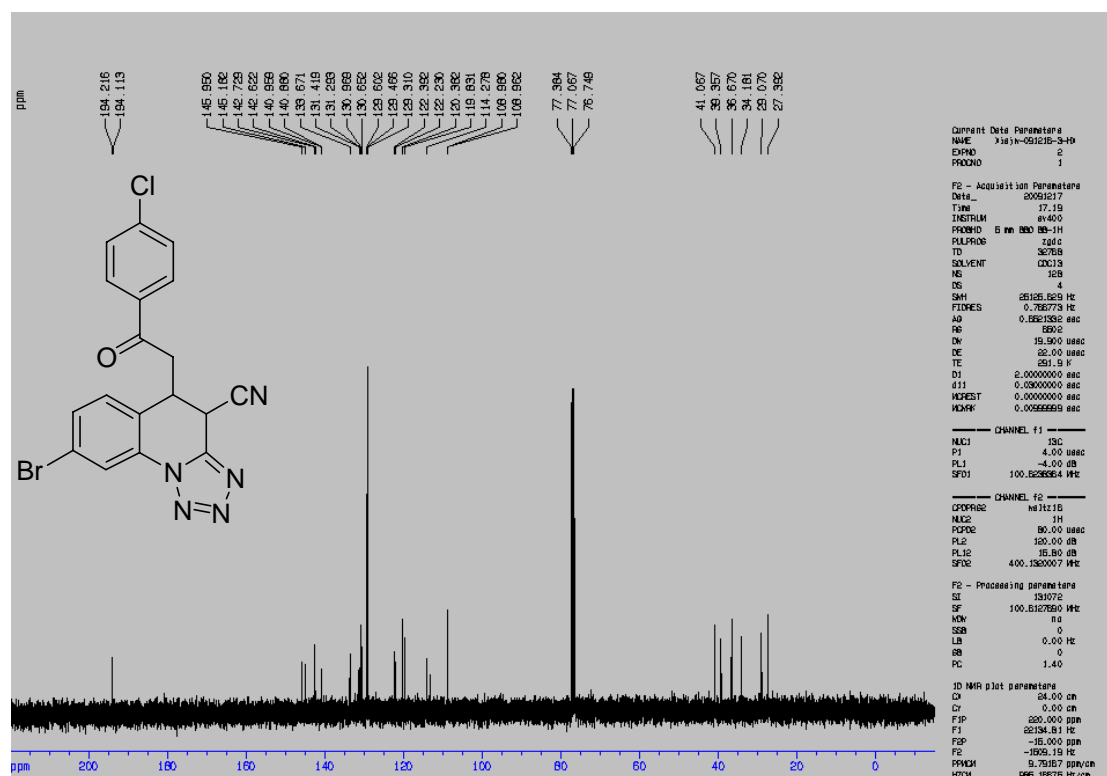



## HPLC Spectra

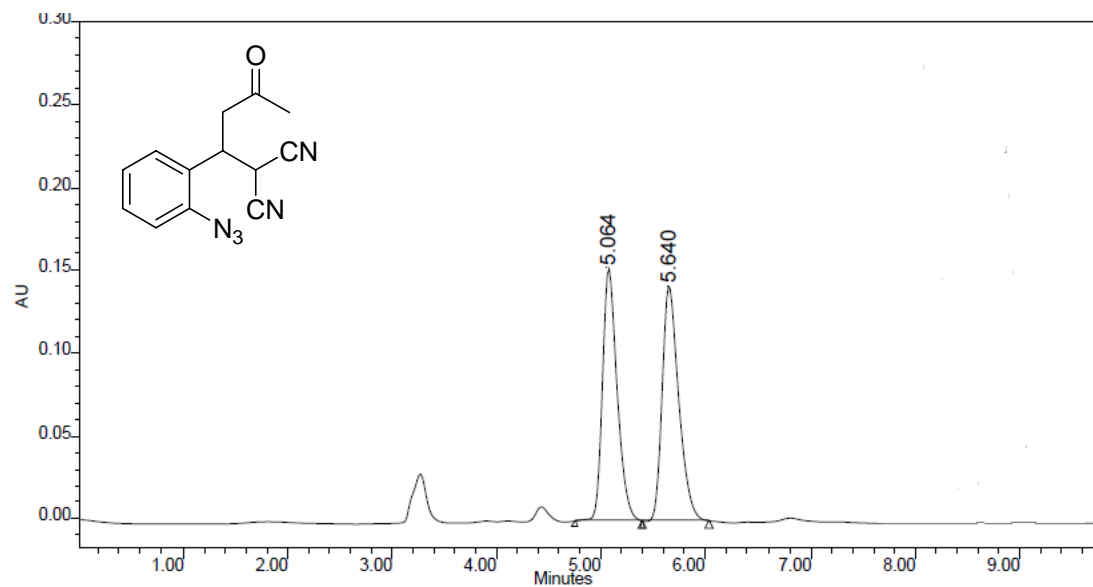

|   | RT (min) | Area (AU*sec) | % Area | Height (AU) | % Height |
|---|----------|---------------|--------|-------------|----------|
| 1 | 5.064    | 1485705       | 48.74  | 152183      | 51.66    |
| 2 | 5.640    | 1562304       | 51.26  | 142393      | 48.34    |

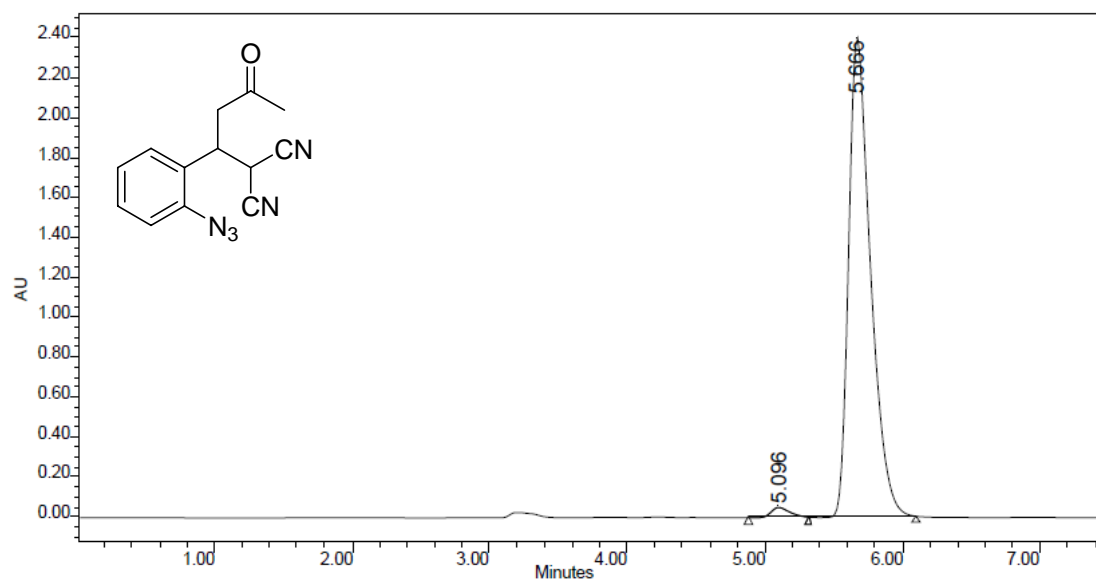

|   | RT (min) | Area (AU*sec) | % Area | Height (AU) | % Height |
|---|----------|---------------|--------|-------------|----------|
| 1 | 5.096    | 463701        | 1.72   | 49940       | 2.04     |
| 2 | 5.666    | 26478827      | 98.28  | 2393238     | 97.96    |

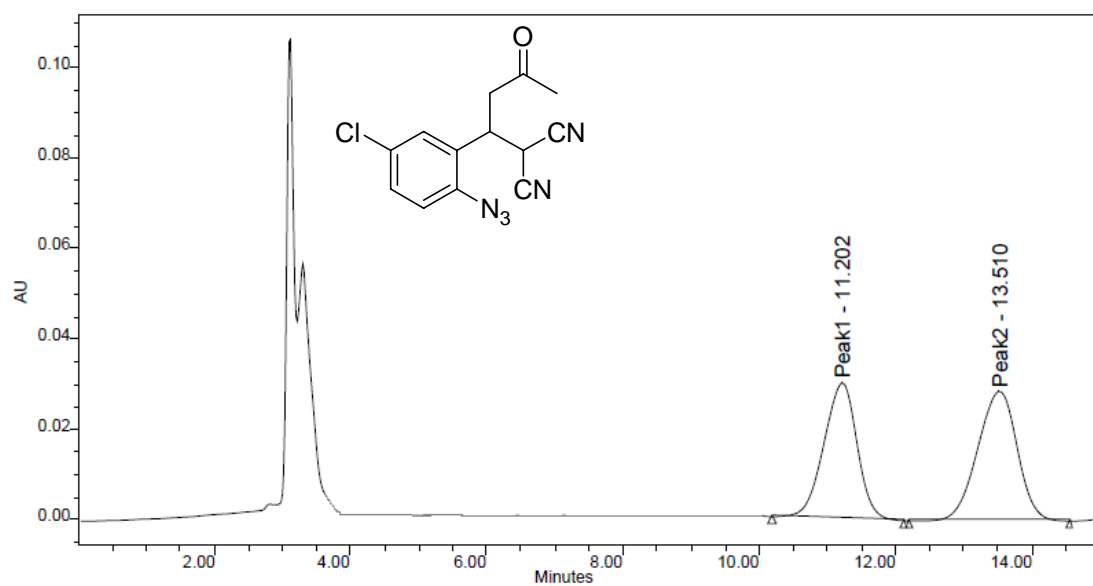

|   | Peak Name | RT (min) | Area (V*sec) | % Area | Height (V) | % Height |
|---|-----------|----------|--------------|--------|------------|----------|
| 1 | Peak1     | 11.202   | 1022602      | 46.83  | 30003      | 51.17    |
| 2 | Peak2     | 13.510   | 1160958      | 53.17  | 28634      | 48.83    |

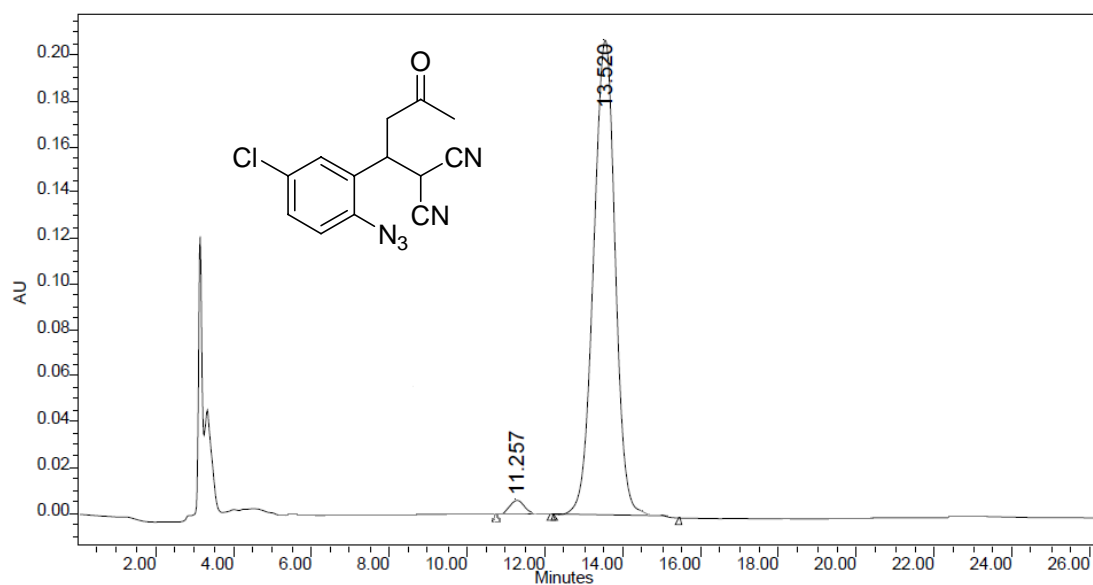

|   | RT (min) | Area (V*sec) | % Area | Height (V) | % Height |
|---|----------|--------------|--------|------------|----------|
| 1 | 11.257   | 225497       | 2.71   | 6853       | 3.20     |
| 2 | 13.520   | 8098821      | 97.29  | 207634     | 96.80    |

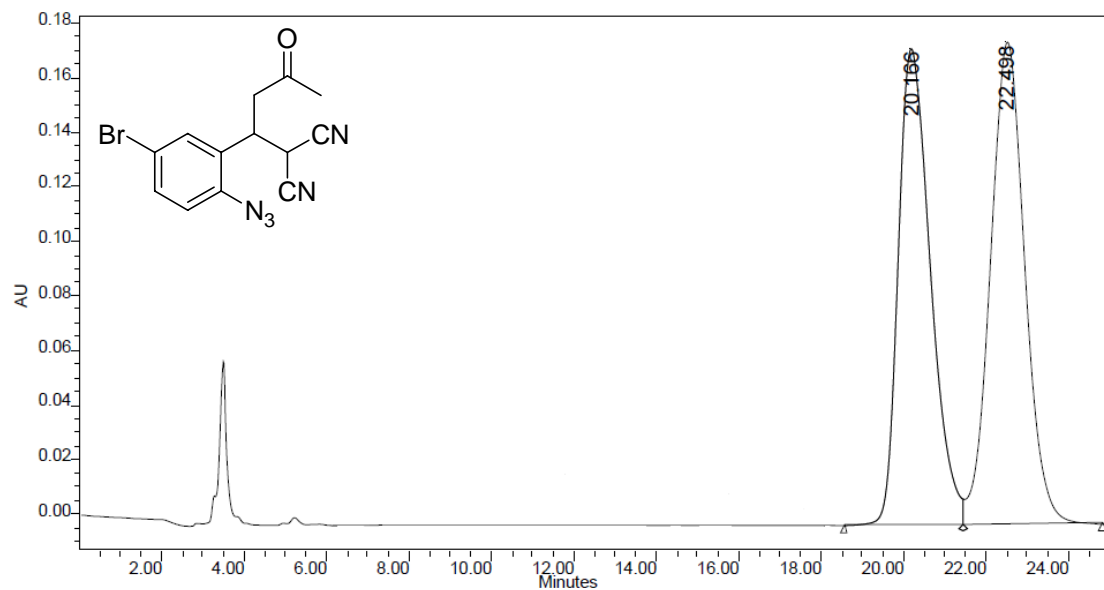

|   | RT (min) | Area (V*sec) | % Area | Height (V) | % Height |
|---|----------|--------------|--------|------------|----------|
| 1 | 20.166   | 9478895      | 48.03  | 174661     | 49.68    |
| 2 | 22.498   | 10258330     | 51.97  | 176913     | 50.32    |

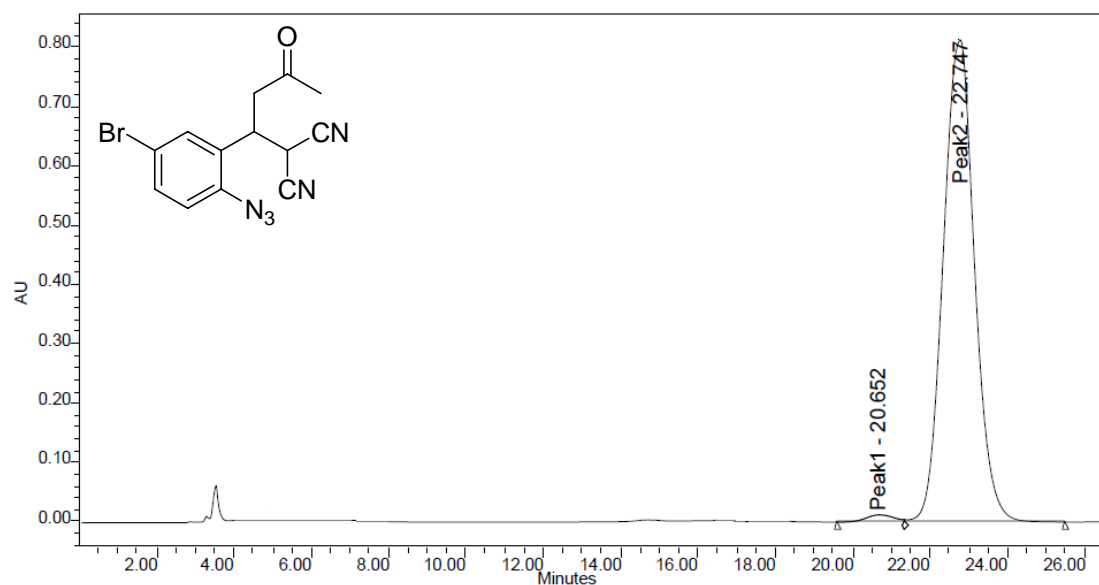

|   | Peak Name | RT (min) | Area (V*sec) | % Area | Height (V) | % Height |
|---|-----------|----------|--------------|--------|------------|----------|
| 1 | Peak1     | 20.652   | 620098       | 1.34   | 12110      | 1.47     |
| 2 | Peak2     | 22.747   | 45629904     | 98.66  | 812493     | 98.53    |

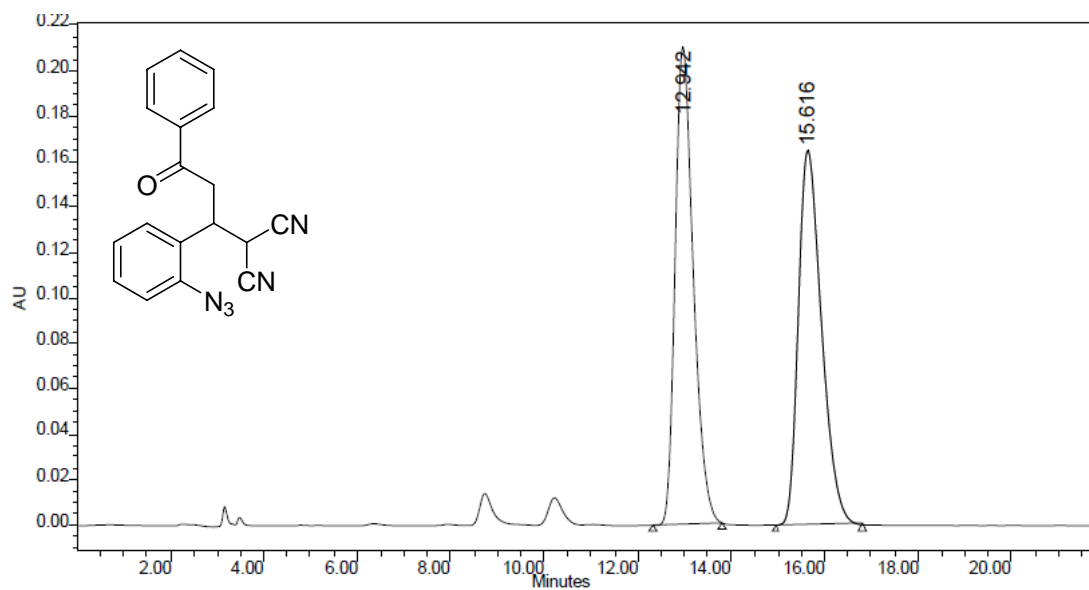

|   | RT (min) | Area (V*sec) | % Area | Height (V) | % Height |
|---|----------|--------------|--------|------------|----------|
| 1 | 12.942   | 5687228      | 49.95  | 210505     | 56.06    |
| 2 | 15.616   | 5698148      | 50.05  | 165008     | 43.94    |

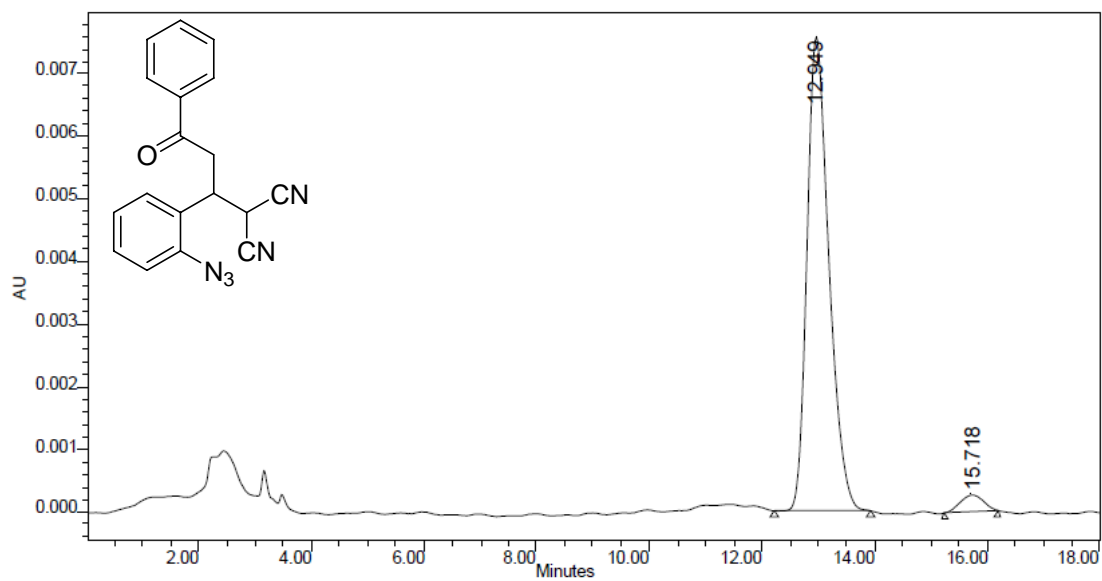

|   | RT (min) | Area (V*sec) | % Area | Height (V) | % Height |
|---|----------|--------------|--------|------------|----------|
| 1 | 12.949   | 205228       | 96.42  | 7572       | 96.62    |
| 2 | 15.718   | 7628         | 3.58   | 265        | 3.38     |

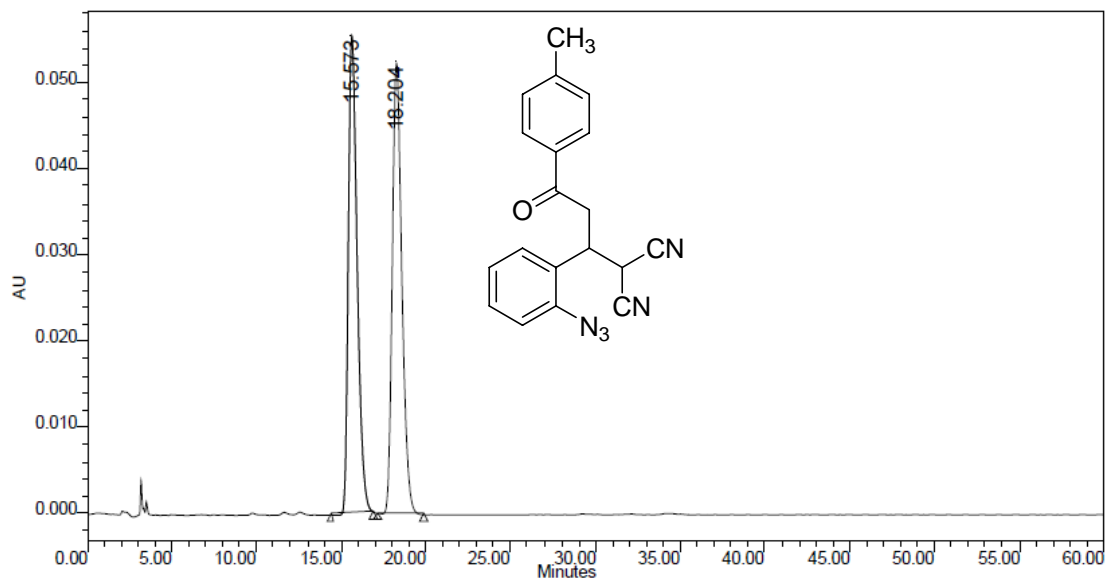

|   | RT (min) | Area (V*sec) | % Area | Height (V) | % Height |
|---|----------|--------------|--------|------------|----------|
| 1 | 15.573   | 2018480      | 49.56  | 55489      | 51.45    |
| 2 | 18.204   | 2053968      | 50.44  | 52353      | 48.55    |

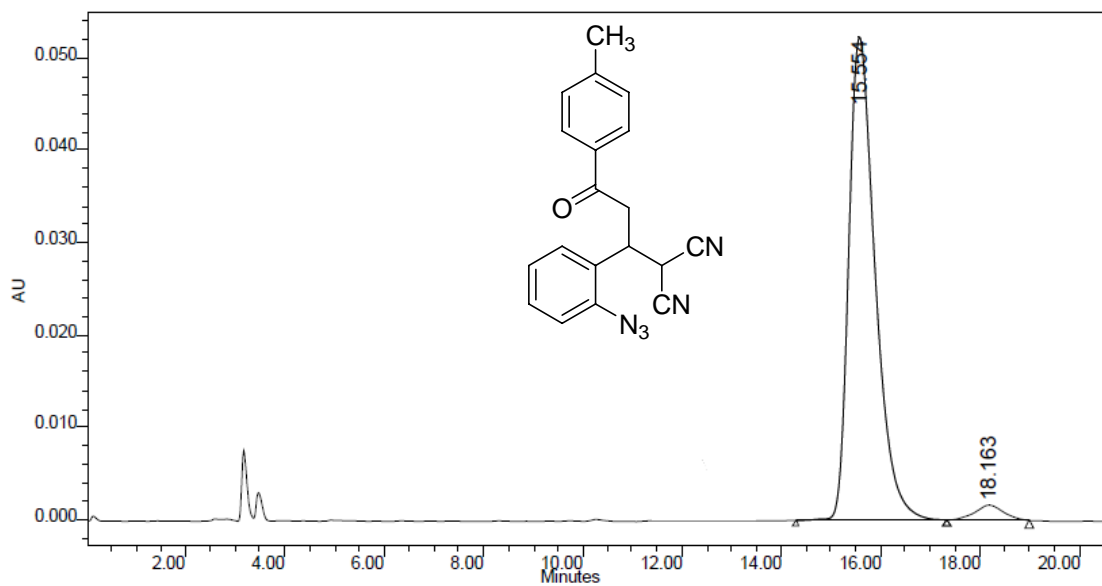

|   | RT (min) | Area (V*sec) | % Area | Height (V) | % Height |
|---|----------|--------------|--------|------------|----------|
| 1 | 15.554   | 1926673      | 96.67  | 52273      | 96.96    |
| 2 | 18.163   | 66406        | 3.33   | 1640       | 3.04     |

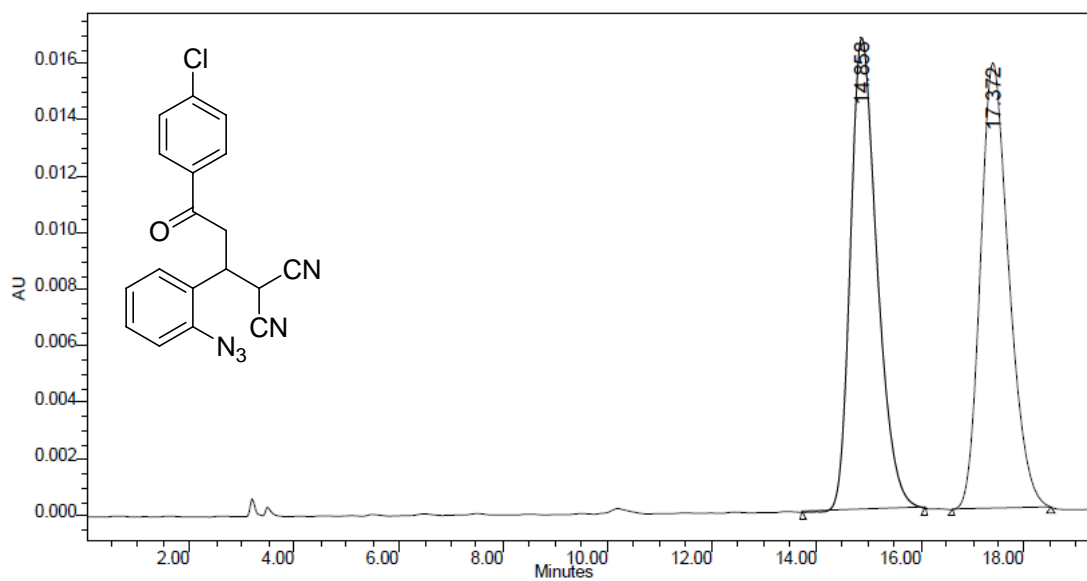

|   | RT (min) | Area (V*sec) | % Area | Height (V) | % Height |
|---|----------|--------------|--------|------------|----------|
| 1 | 14.858   | 593766       | 49.75  | 16733      | 51.47    |
| 2 | 17.372   | 599688       | 50.25  | 15779      | 48.53    |

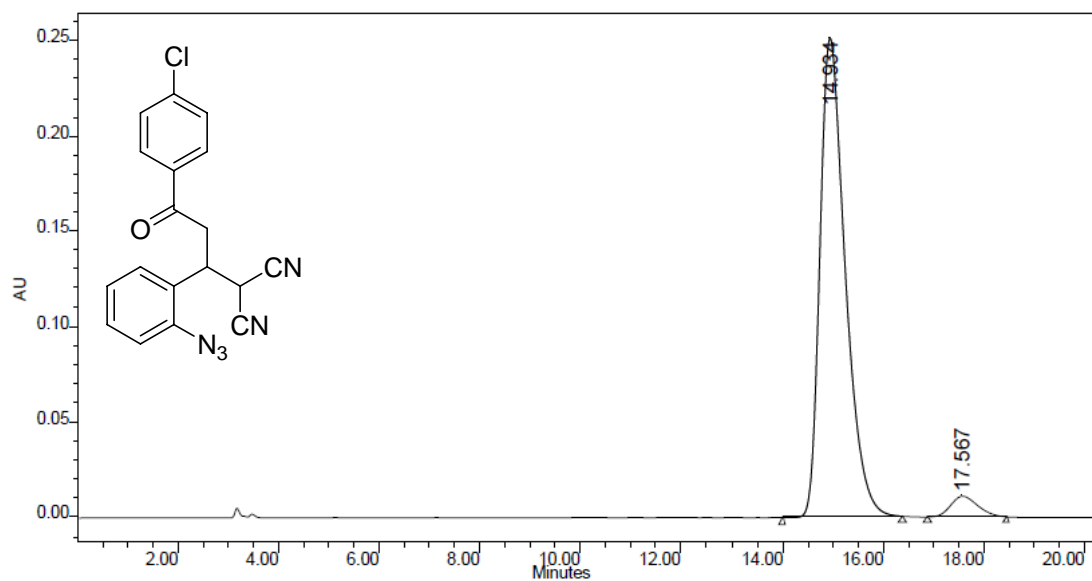

|   | RT (min) | Area (V*sec) | % Area | Height (V) | % Height |
|---|----------|--------------|--------|------------|----------|
| 1 | 14.934   | 8741829      | 95.56  | 251433     | 95.87    |
| 2 | 17.567   | 406314       | 4.44   | 10842      | 4.13     |

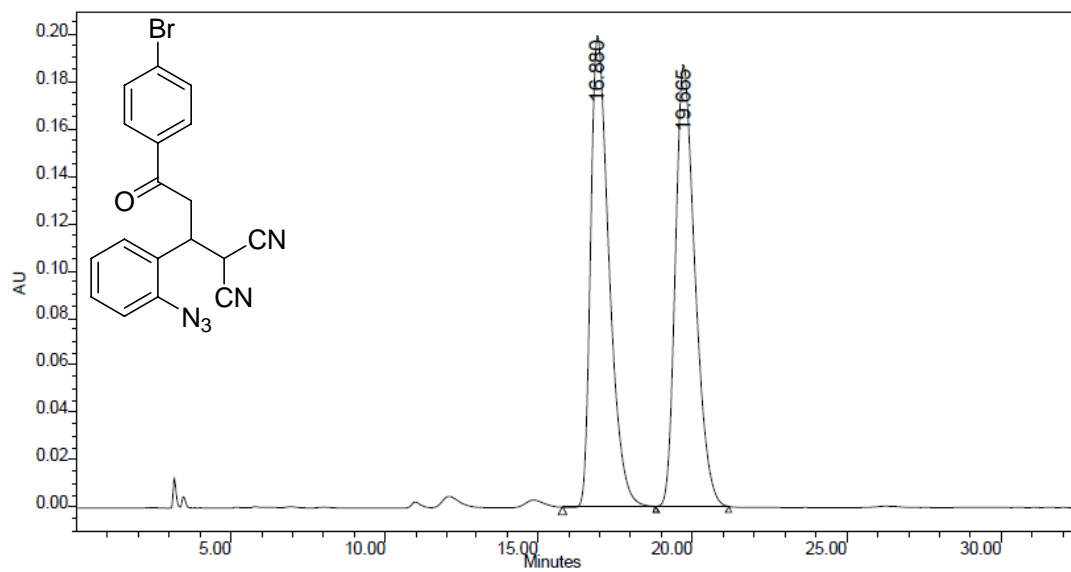

|   | RT (min) | Area (V*sec) | % Area | Height (V) | % Height |
|---|----------|--------------|--------|------------|----------|
| 1 | 16.880   | 8239418      | 49.94  | 198790     | 51.63    |
| 2 | 19.665   | 8258958      | 50.06  | 186257     | 48.37    |

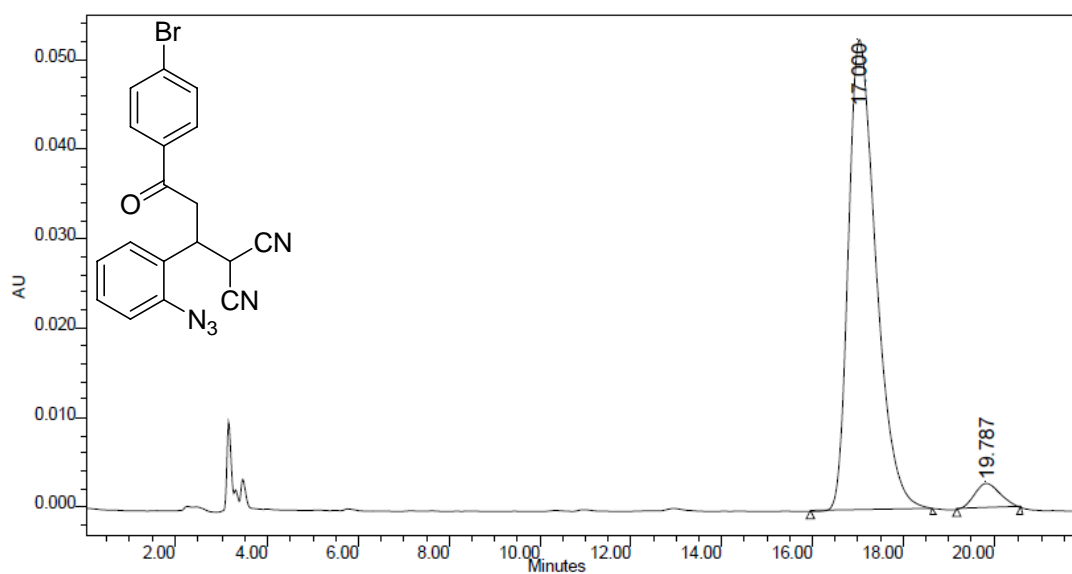

|   | RT (min) | Area (V*sec) | % Area | Height (V) | % Height |
|---|----------|--------------|--------|------------|----------|
| 1 | 17.000   | 2218009      | 95.21  | 52595      | 94.96    |
| 2 | 19.787   | 111554       | 4.79   | 2793       | 5.04     |

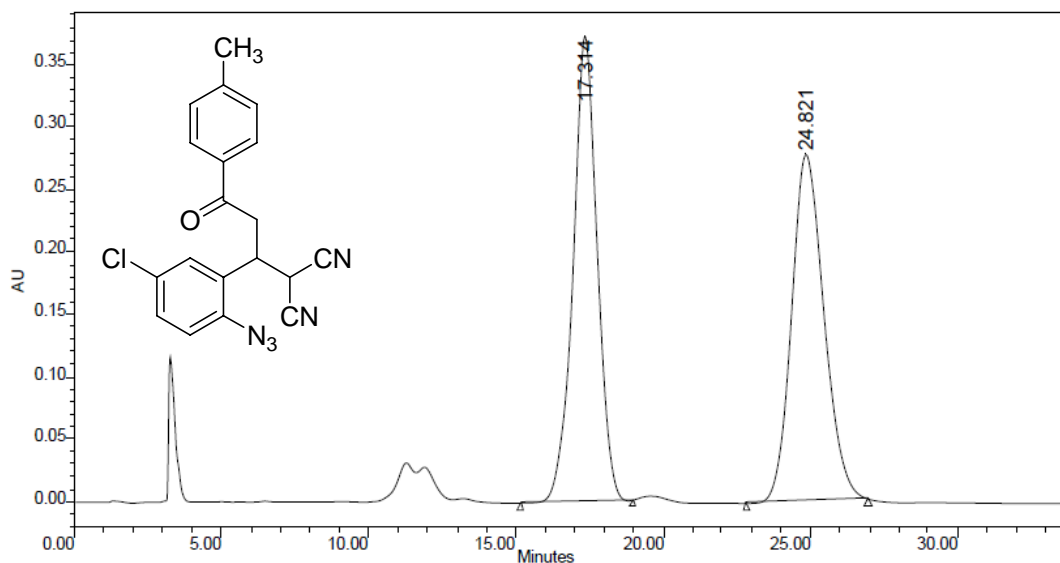

|   | RT (min) | Area (V*sec) | % Area | Height (V) | % Height |
|---|----------|--------------|--------|------------|----------|
| 1 | 17.314   | 21170478     | 49.86  | 372748     | 57.28    |
| 2 | 24.821   | 21293482     | 50.14  | 277969     | 42.72    |

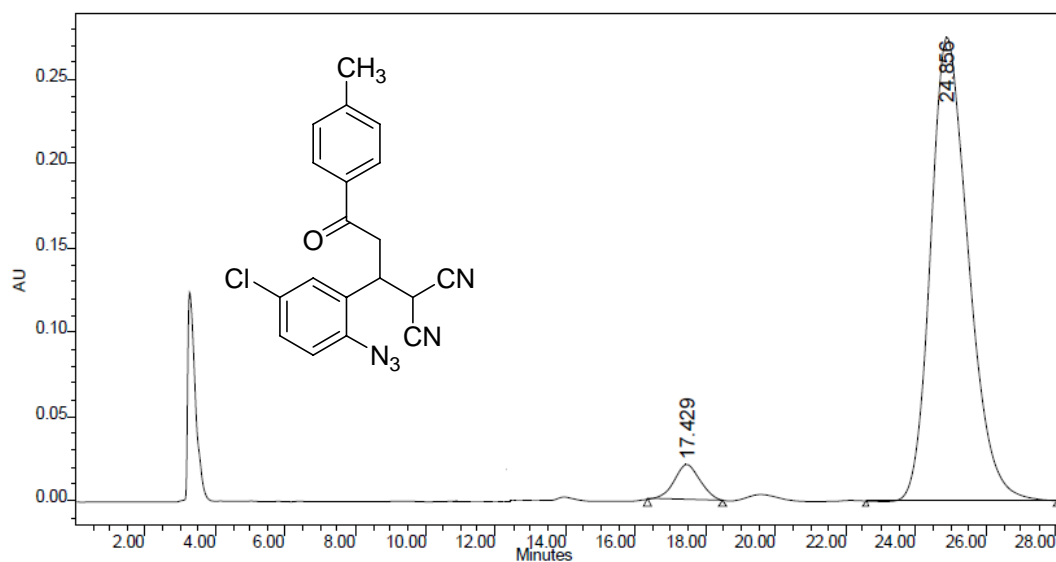

|   | RT (min) | Area (V*sec) | % Area | Height (V) | % Height |
|---|----------|--------------|--------|------------|----------|
| 1 | 17.429   | 1082533      | 4.99   | 20894      | 7.06     |
| 2 | 24.856   | 20616130     | 95.01  | 274954     | 92.94    |



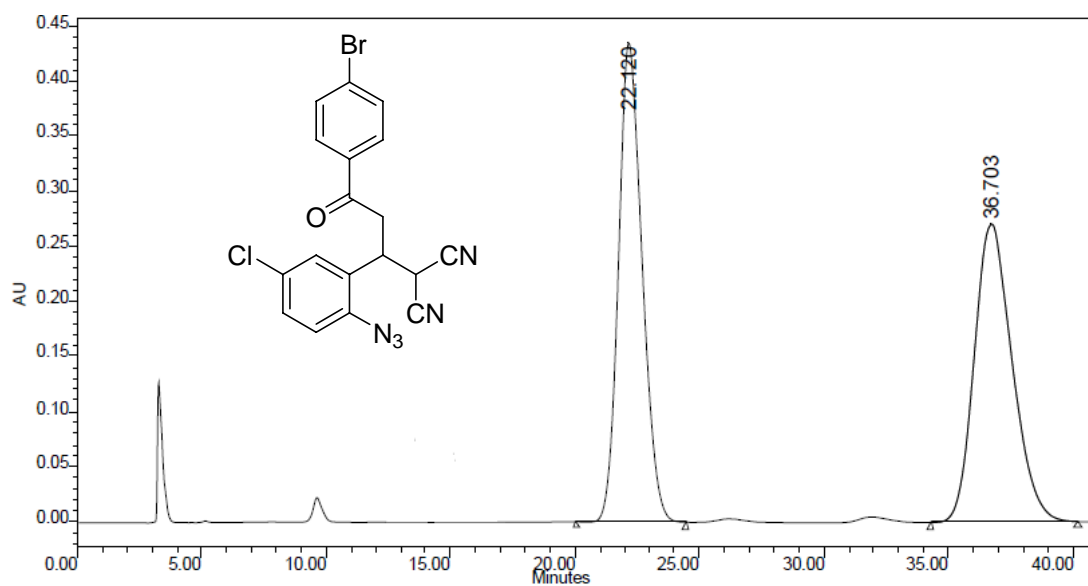

|   | RT (min) | Area (V*sec) | % Area | Height (V) | % Height |
|---|----------|--------------|--------|------------|----------|
| 1 | 22.120   | 28682171     | 50.03  | 434800     | 61.65    |
| 2 | 36.703   | 28643229     | 49.97  | 270456     | 38.35    |

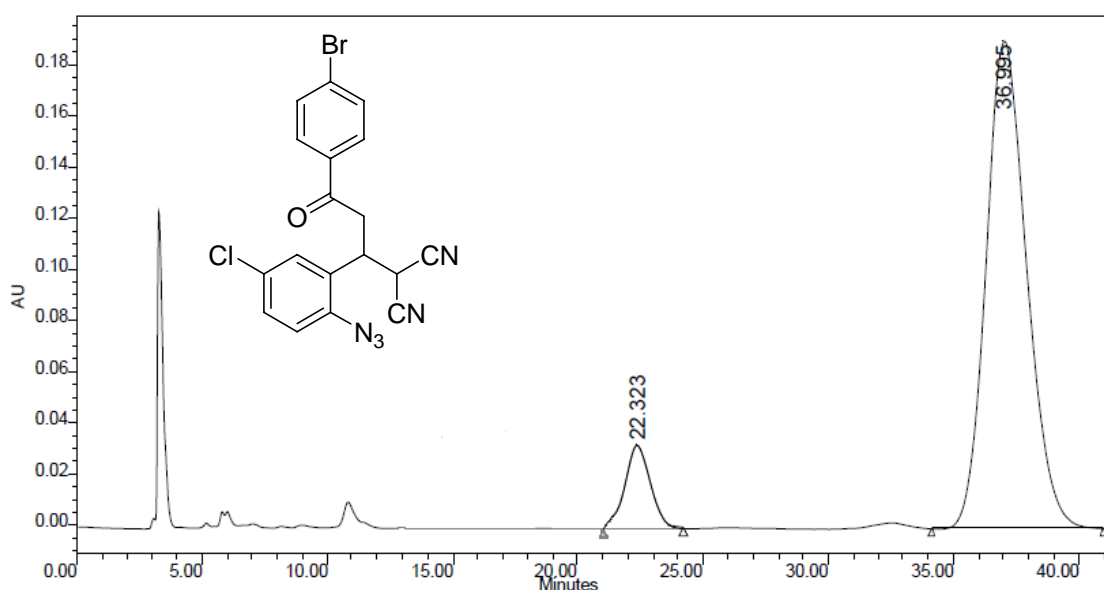

|   | RT (min) | Area (V*sec) | % Area | Height (V) | % Height |
|---|----------|--------------|--------|------------|----------|
| 1 | 22.323   | 1903411      | 8.16   | 29689      | 13.51    |
| 2 | 36.995   | 21420950     | 91.84  | 190062     | 86.49    |

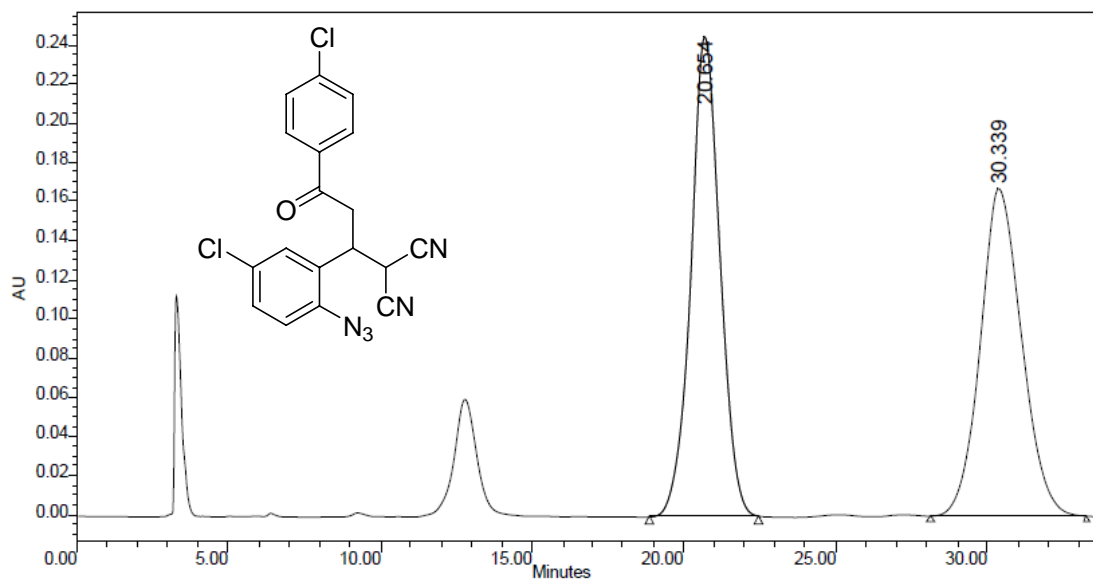

|   | RT (min) | Area (V*sec) | % Area | Height (V) | % Height |
|---|----------|--------------|--------|------------|----------|
| 1 | 20.654   | 16329161     | 50.77  | 244924     | 59.43    |
| 2 | 30.339   | 15831656     | 49.23  | 167209     | 40.57    |

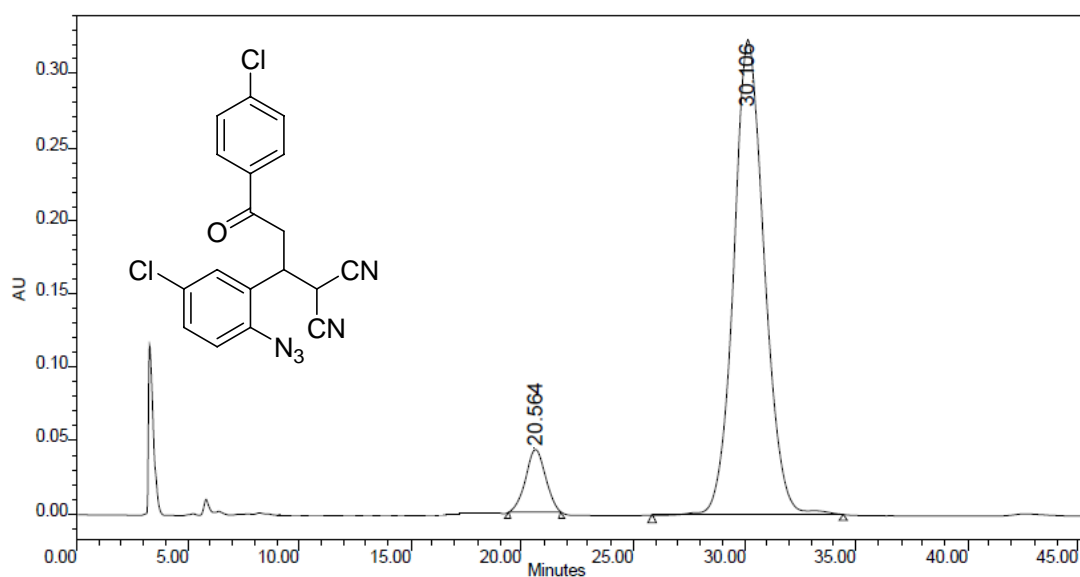

|   | RT (min) | Area (V*sec) | % Area | Height (V) | % Height |
|---|----------|--------------|--------|------------|----------|
| 1 | 20.564   | 2693535      | 7.98   | 42884      | 11.69    |
| 2 | 30.106   | 31061744     | 92.02  | 324047     | 88.31    |

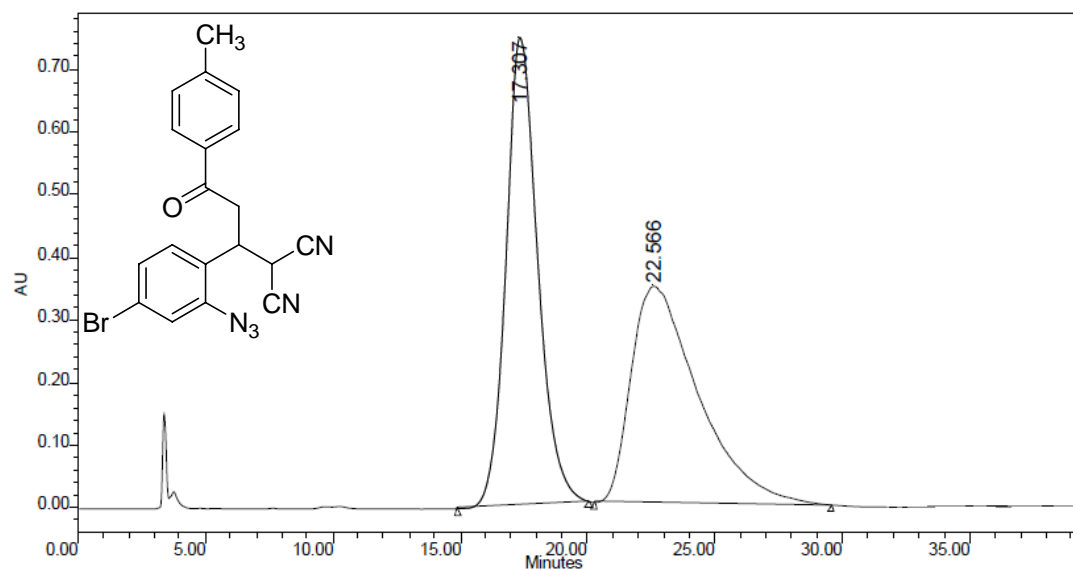

|   | RT (min) | Area (V*sec) | % Area | Height (V) | % Height |
|---|----------|--------------|--------|------------|----------|
| 1 | 17.307   | 64647322     | 50.33  | 747131     | 68.35    |
| 2 | 22.566   | 63805351     | 49.67  | 346031     | 31.65    |

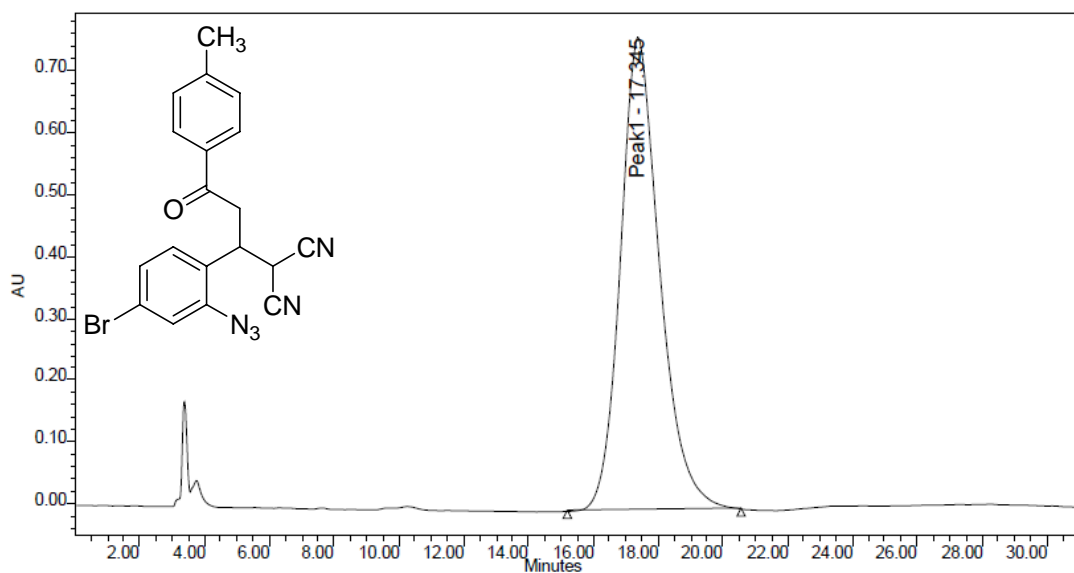

|   | Peak Name | RT (min) | Area (V*sec) | % Area | Height (V) | % Height |
|---|-----------|----------|--------------|--------|------------|----------|
| 1 | Peak1     | 17.345   | 64429856     | 100.00 | 762761     | 100.00   |

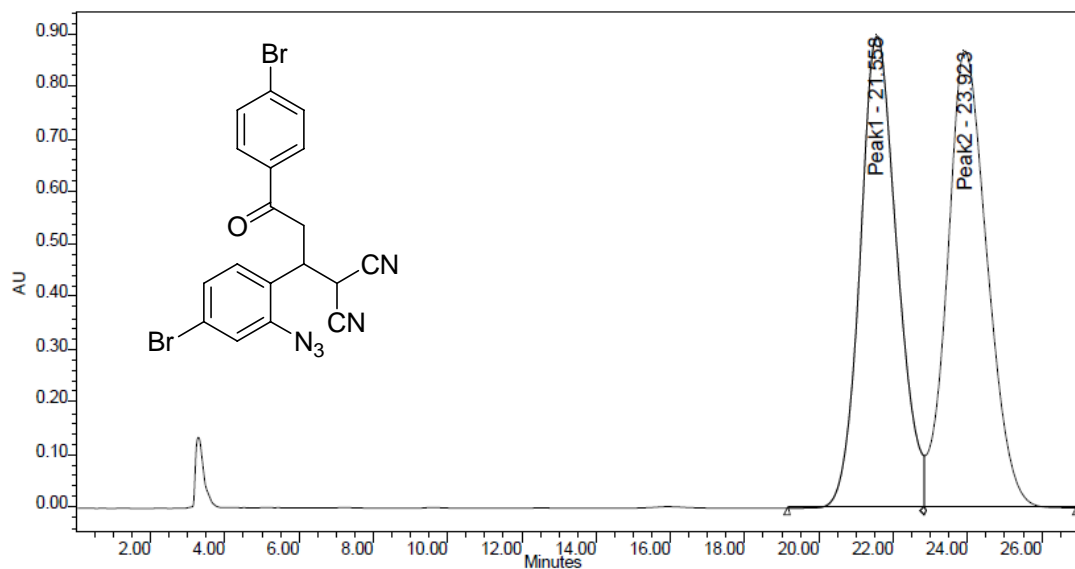

| Peak Name | RT (min) | Area (V*sec) | % Area | Height (V) | % Height |
|-----------|----------|--------------|--------|------------|----------|
| 1 Peak1   | 21.558   | 62190040     | 48.89  | 896966     | 50.80    |
| 2 Peak2   | 23.923   | 65006954     | 51.11  | 868693     | 49.20    |

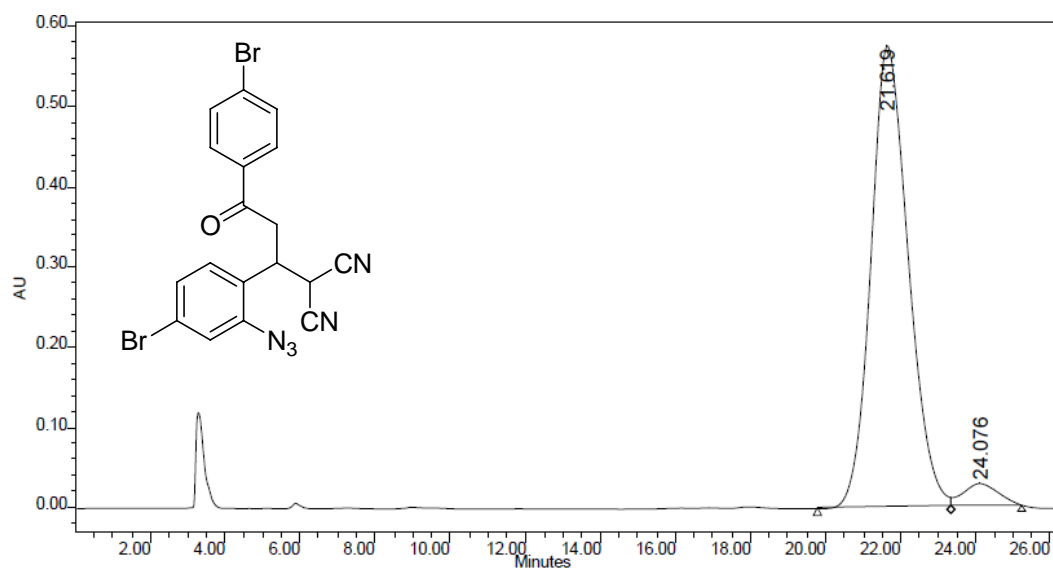

| RT (min) | Area (V*sec) | % Area | Height (V) | % Height |
|----------|--------------|--------|------------|----------|
| 1 21.619 | 39941734     | 95.61  | 576041     | 95.35    |
| 2 24.076 | 1831893      | 4.39   | 28089      | 4.65     |

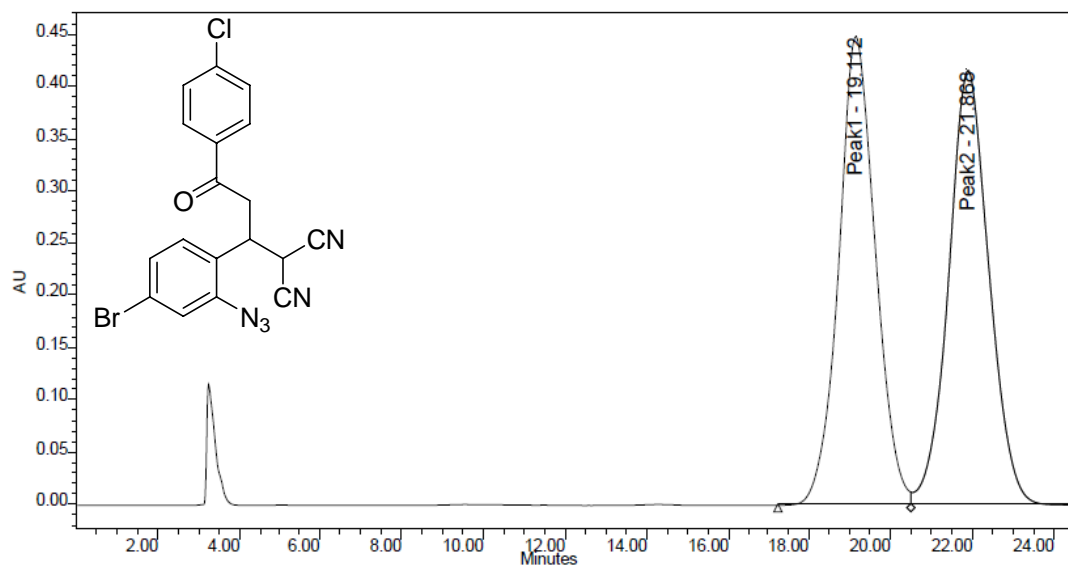

| Peak Name | RT (min) | Area (ΔV*sec) | % Area | Height (ΔV) | % Height |
|-----------|----------|---------------|--------|-------------|----------|
| 1 Peak1   | 19.112   | 28126439      | 49.57  | 448190      | 51.88    |
| 2 Peak2   | 21.868   | 28609382      | 50.43  | 415785      | 48.12    |

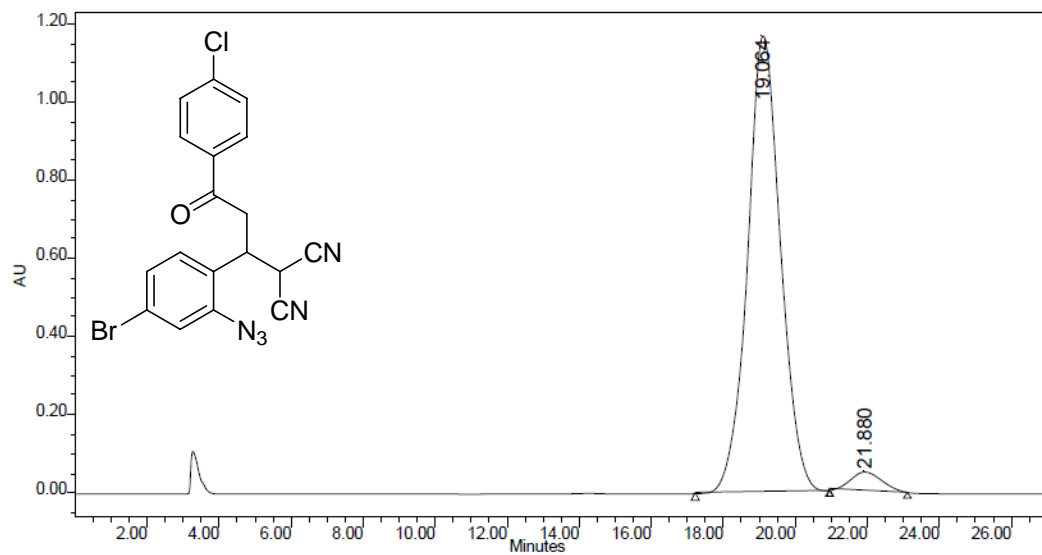

| RT (min) | Area (ΔV*sec) | % Area | Height (ΔV) | % Height |
|----------|---------------|--------|-------------|----------|
| 1 19.064 | 74036589      | 96.12  | 1165586     | 95.95    |
| 2 21.880 | 2992189       | 3.88   | 49162       | 4.05     |

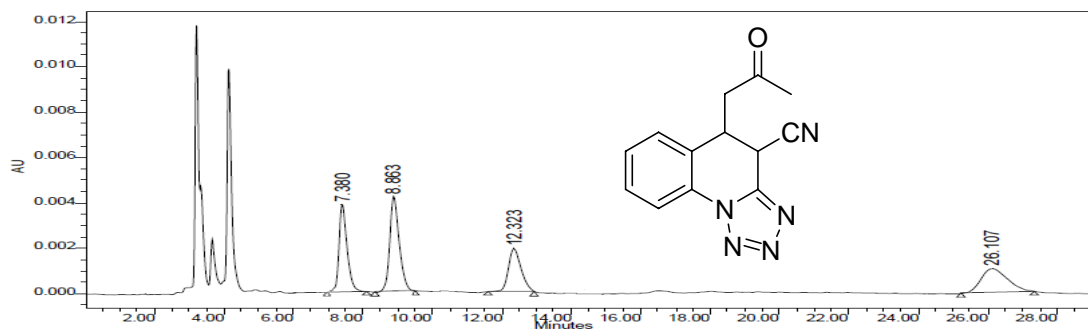

|   | RT (min) | Area (V*sec) | % Area | Height (V) | % Height |
|---|----------|--------------|--------|------------|----------|
| 1 | 7.380    | 69328        | 27.20  | 3860       | 35.07    |
| 2 | 8.863    | 80019        | 31.39  | 4188       | 38.06    |
| 3 | 12.323   | 49101        | 19.26  | 1903       | 17.29    |
| 4 | 26.107   | 56478        | 22.15  | 1054       | 9.58     |

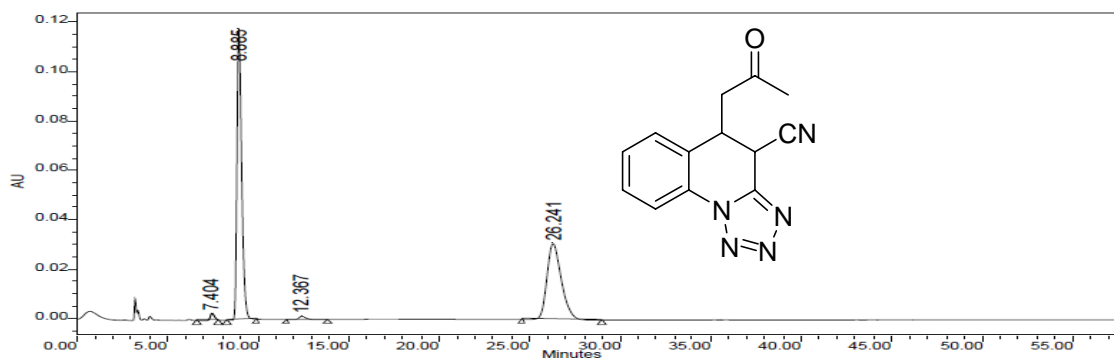

|   | RT (min) | Area (V*sec) | % Area | Height (V) | % Height |
|---|----------|--------------|--------|------------|----------|
| 1 | 7.404    | 43624        | 1.12   | 2811       | 1.84     |
| 2 | 8.885    | 2113661      | 54.37  | 118111     | 77.22    |
| 3 | 12.367   | 34035        | 0.88   | 1272       | 0.83     |
| 4 | 26.241   | 1696415      | 43.64  | 30768      | 20.11    |

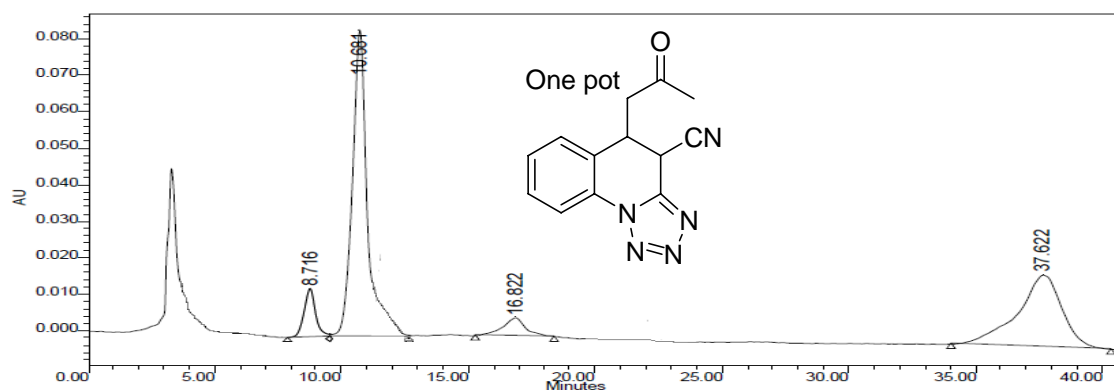

|   | RT (min) | Area (V*sec) | % Area | Height (V) | % Height |
|---|----------|--------------|--------|------------|----------|
| 1 | 8.716    | 425781       | 6.75   | 13323      | 10.92    |
| 2 | 10.681   | 3133804      | 49.66  | 83948      | 68.78    |
| 3 | 16.822   | 323901       | 5.13   | 5036       | 4.13     |
| 4 | 37.622   | 2426575      | 38.46  | 19746      | 16.18    |

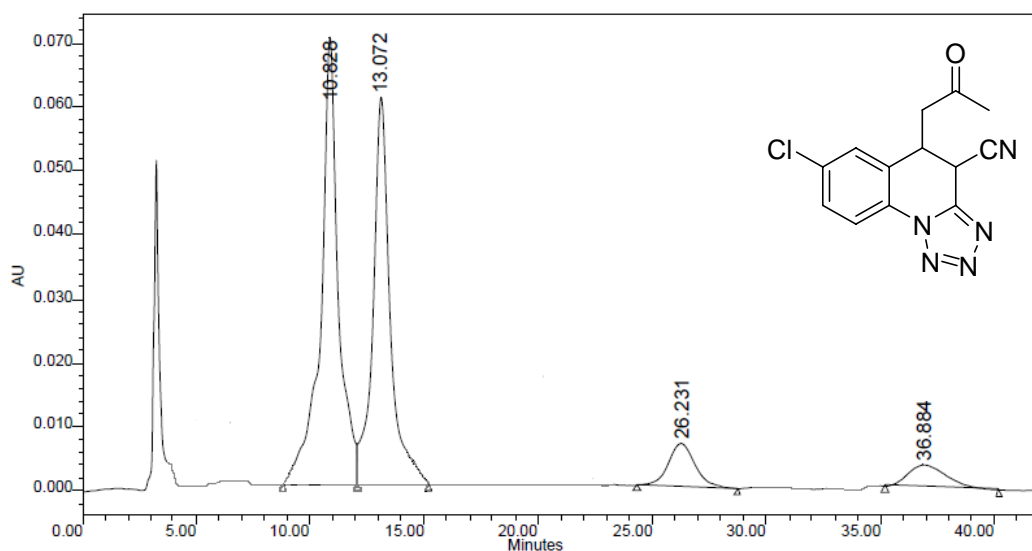

|   | RT (min) | Area (V*sec) | % Area | Height (V) | % Height |
|---|----------|--------------|--------|------------|----------|
| 1 | 10.828   | 3224919      | 45.46  | 66988      | 49.59    |
| 2 | 13.072   | 2898384      | 40.86  | 57826      | 42.81    |
| 3 | 26.231   | 554883       | 7.82   | 6761       | 5.01     |
| 4 | 36.884   | 415508       | 5.86   | 3499       | 2.59     |

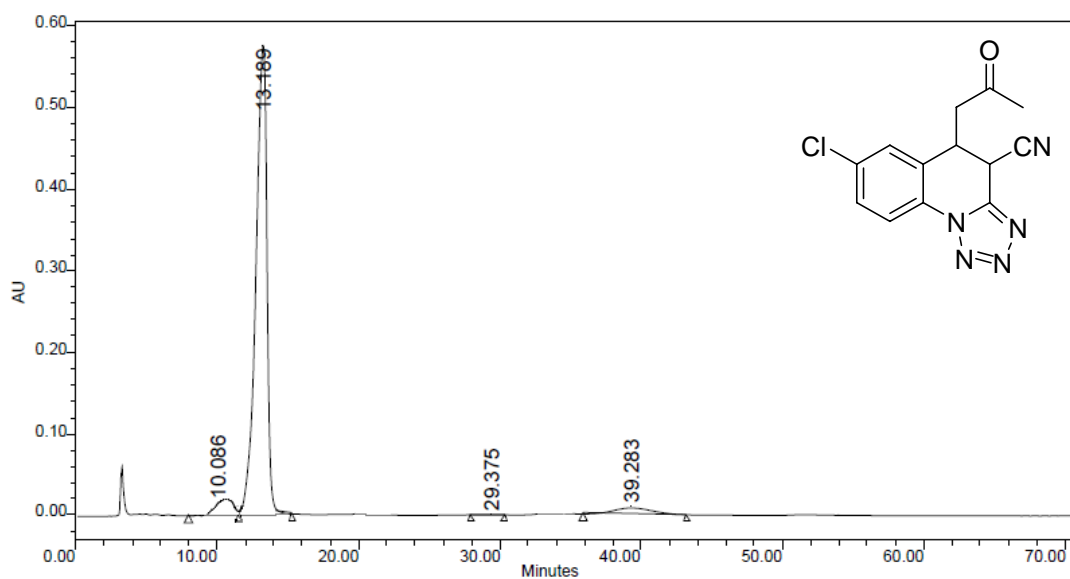

|   | RT (min) | Area (V*sec) | % Area | Height (V) | % Height |
|---|----------|--------------|--------|------------|----------|
| 1 | 10.086   | 905919       | 2.78   | 11047      | 1.88     |
| 2 | 13.189   | 30196139     | 92.57  | 569654     | 96.77    |
| 3 | 29.375   | 4165         | 0.01   | -62        | 0.01     |
| 4 | 39.283   | 1512776      | 4.64   | 7900       | 1.34     |

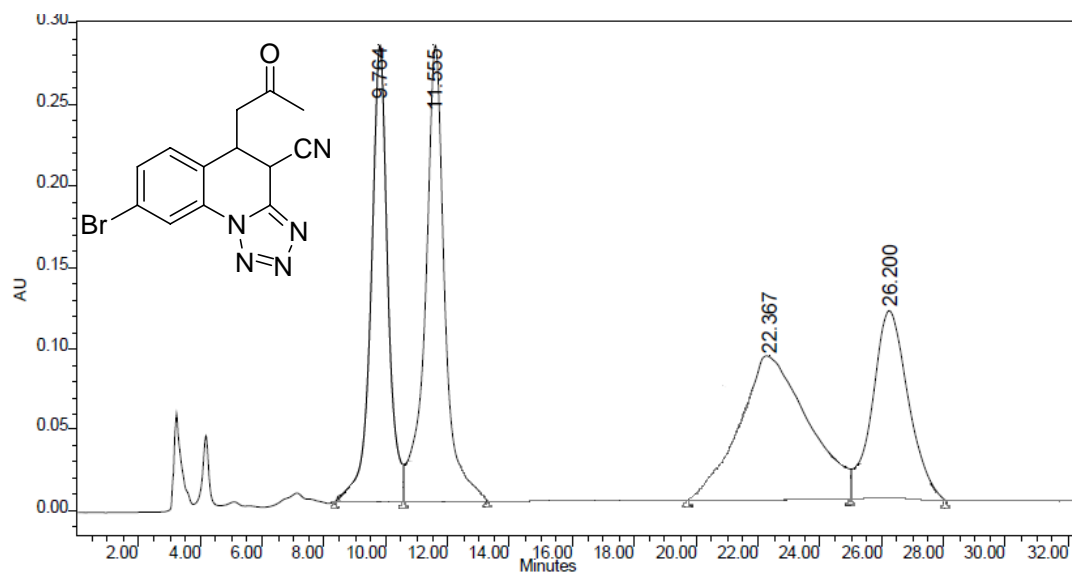

|   | RT (min) | Area (V*sec) | % Area | Height (V) | % Height |
|---|----------|--------------|--------|------------|----------|
| 1 | 9.764    | 9025966      | 29.36  | 265300     | 40.17    |
| 2 | 11.555   | 9290104      | 30.22  | 258065     | 39.08    |
| 3 | 22.367   | 5612470      | 18.26  | 37325      | 5.65     |
| 4 | 26.200   | 6809787      | 22.15  | 99708      | 15.10    |

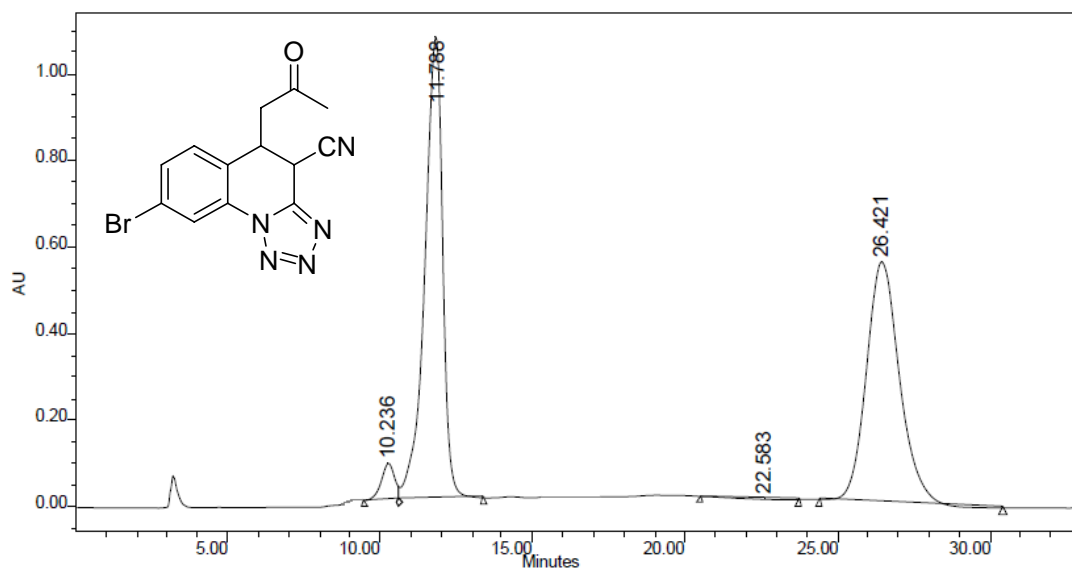

|   | RT (min) | Area (V*sec) | % Area | Height (V) | % Height |
|---|----------|--------------|--------|------------|----------|
| 1 | 10.236   | 2625586      | 2.95   | 84396      | 4.94     |
| 2 | 11.788   | 43780938     | 49.24  | 1067015    | 62.42    |
| 3 | 22.583   | 259136       | 0.29   | -2160      | 0.13     |
| 4 | 26.421   | 42249043     | 47.52  | 555833     | 32.52    |



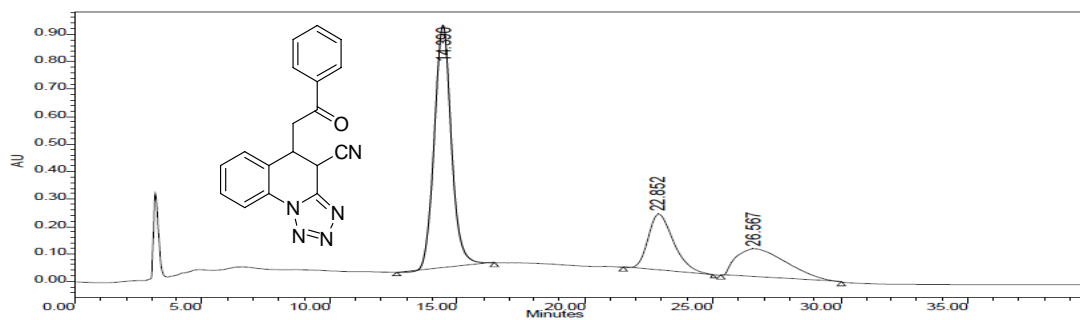

|   | RT (min) | Area (V*sec) | % Area | Height (V) | % Height |
|---|----------|--------------|--------|------------|----------|
| 1 | 14.390   | 41433802     | 59.07  | 884268     | 74.15    |
| 2 | 22.852   | 14256358     | 20.33  | 204045     | 17.11    |
| 3 | 26.567   | 14451804     | 20.60  | 104171     | 8.74     |

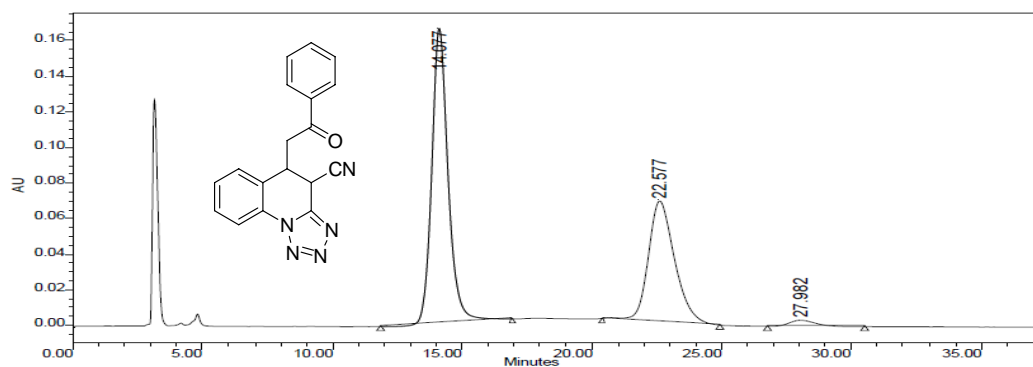

|   | RT (min) | Area (V*sec) | % Area | Height (V) | % Height |
|---|----------|--------------|--------|------------|----------|
| 1 | 14.077   | 7268453      | 59.22  | 165697     | 69.94    |
| 2 | 22.577   | 4767066      | 38.84  | 67792      | 28.61    |
| 3 | 27.982   | 238169       | 1.94   | 3434       | 1.45     |

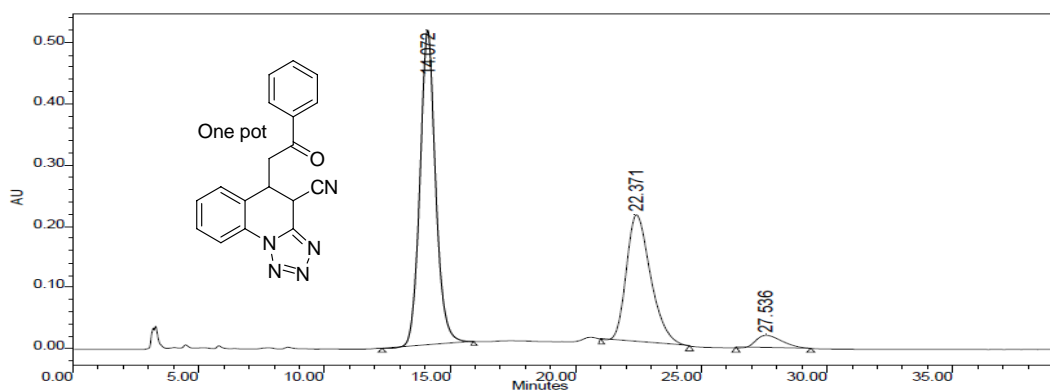

|   | RT (min) | Area (V*sec) | % Area | Height (V) | % Height |
|---|----------|--------------|--------|------------|----------|
| 1 | 14.072   | 22295521     | 58.97  | 514354     | 69.23    |
| 2 | 22.371   | 14004944     | 37.04  | 207921     | 27.98    |
| 3 | 27.536   | 1506955      | 3.99   | 20712      | 2.79     |

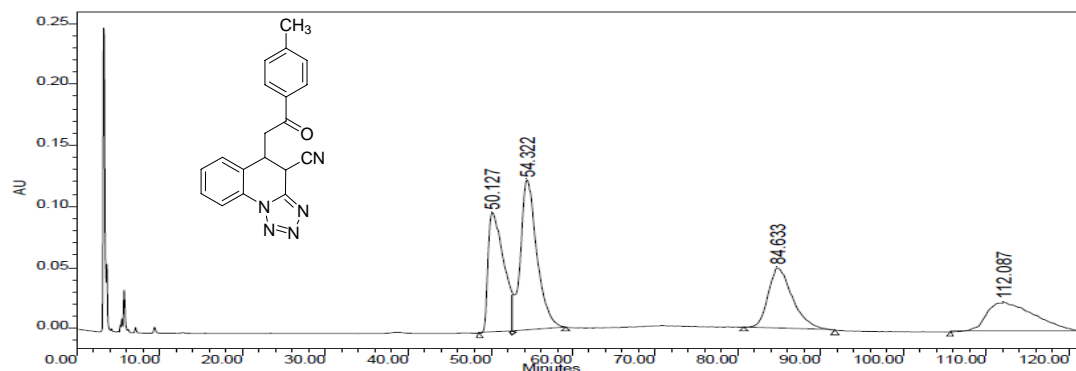

|   | RT (min) | Area (V <sup>2</sup> sec) | % Area | Height (V) | % Height |
|---|----------|---------------------------|--------|------------|----------|
| 1 | 50.127   | 13227643                  | 26.46  | 98076      | 33.31    |
| 2 | 54.322   | 16963353                  | 33.93  | 122840     | 41.72    |
| 3 | 84.633   | 10138646                  | 20.28  | 49370      | 16.77    |
| 4 | 112.087  | 9666839                   | 19.34  | 24175      | 8.21     |

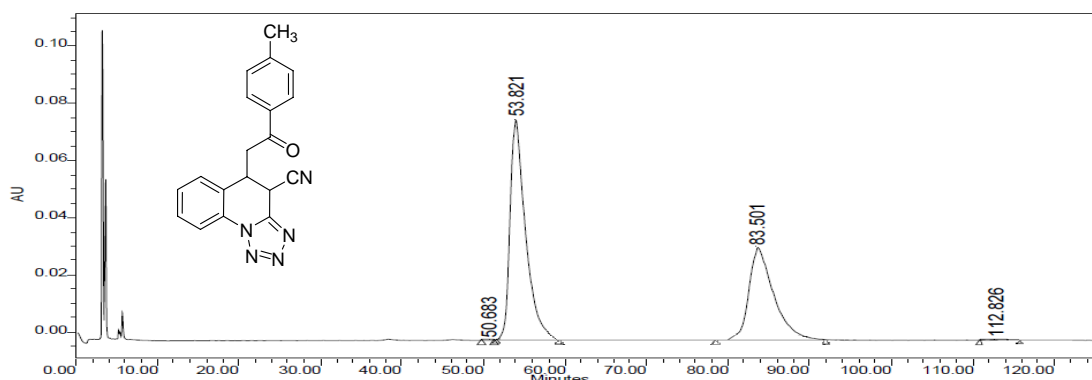

|   | RT (min) | Area (V <sup>2</sup> sec) | % Area | Height (V) | % Height |
|---|----------|---------------------------|--------|------------|----------|
| 1 | 50.683   | 4933                      | 0.03   | -103       | 0.10     |
| 2 | 53.821   | 9837474                   | 62.17  | 76188      | 71.10    |
| 3 | 83.501   | 5970617                   | 37.73  | 30776      | 28.72    |
| 4 | 112.826  | 10094                     | 0.06   | -86        | 0.08     |

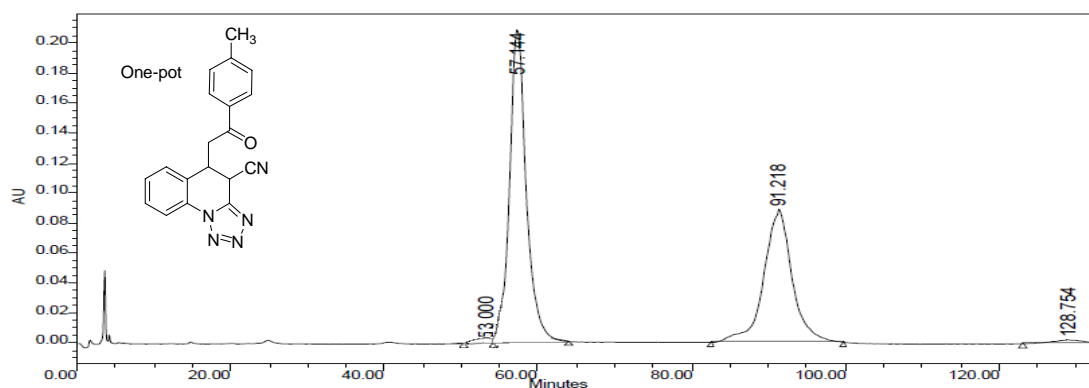

|   | RT (min) | Area (V <sup>2</sup> sec) | % Area | Height (V) | % Height |
|---|----------|---------------------------|--------|------------|----------|
| 1 | 53.000   | 687942                    | 1.28   | 6341       | 2.12     |
| 2 | 57.144   | 29650137                  | 55.26  | 201746     | 67.48    |
| 3 | 91.218   | 22741660                  | 42.38  | 88653      | 29.65    |
| 4 | 128.754  | 580221                    | 1.08   | 2214       | 0.74     |

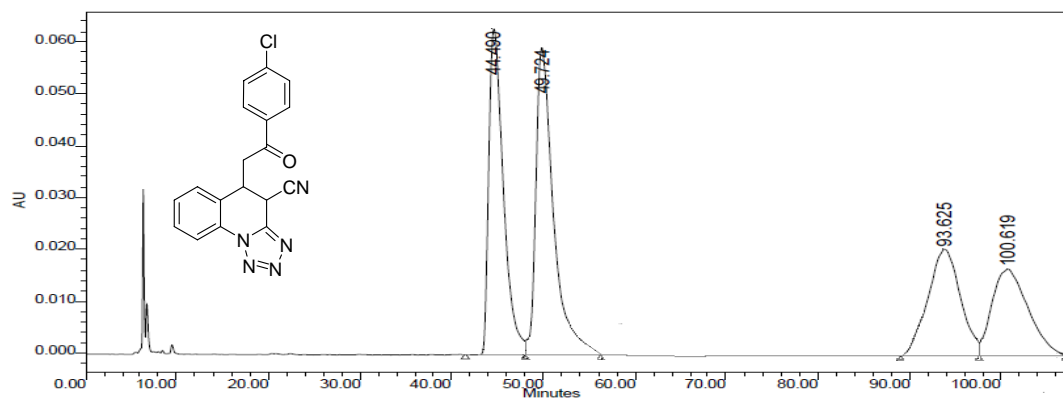

|   | RT (min) | Area (V*sec) | % Area | Height (V) | % Height |
|---|----------|--------------|--------|------------|----------|
| 1 | 44.490   | 6526826      | 32.67  | 61421      | 41.41    |
| 2 | 49.724   | 6393603      | 32.00  | 55601      | 37.48    |
| 3 | 93.625   | 3474825      | 17.39  | 16864      | 11.37    |
| 4 | 100.619  | 3584029      | 17.94  | 14450      | 9.74     |

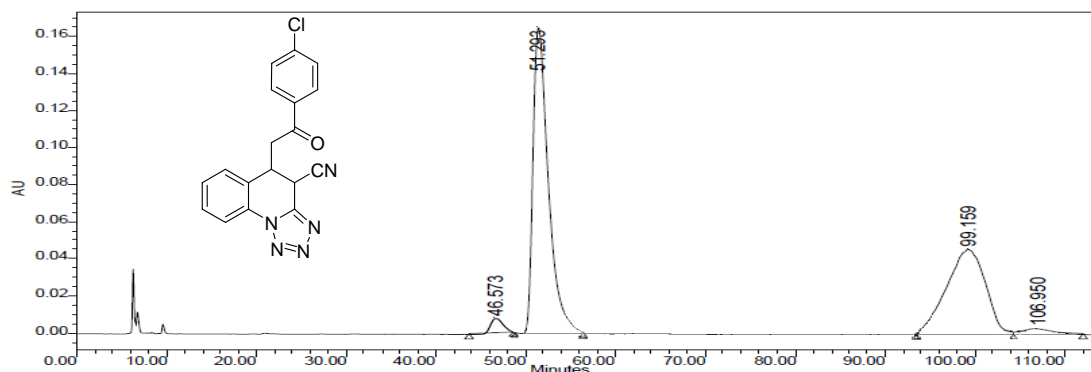

|   | RT (min) | Area (V*sec) | % Area | Height (V) | % Height |
|---|----------|--------------|--------|------------|----------|
| 1 | 46.573   | 778445       | 2.44   | 7896       | 3.66     |
| 2 | 51.293   | 18699253     | 58.56  | 162568     | 75.43    |
| 3 | 99.159   | 12071855     | 37.80  | 42966      | 19.94    |
| 4 | 106.950  | 384191       | 1.20   | 2095       | 0.97     |

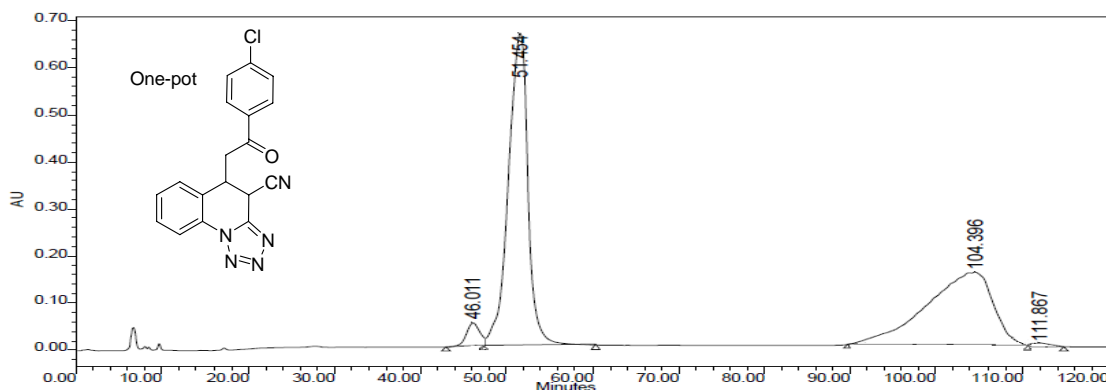

|   | RT (min) | Area (V*sec) | % Area | Height (V) | % Height |
|---|----------|--------------|--------|------------|----------|
| 1 | 46.011   | 4315826      | 2.33   | 50605      | 5.87     |
| 2 | 51.454   | 107219257    | 57.82  | 664808     | 77.11    |
| 3 | 104.396  | 72826638     | 39.27  | 141862     | 16.45    |
| 4 | 111.867  | 1077993      | 0.58   | 4875       | 0.57     |

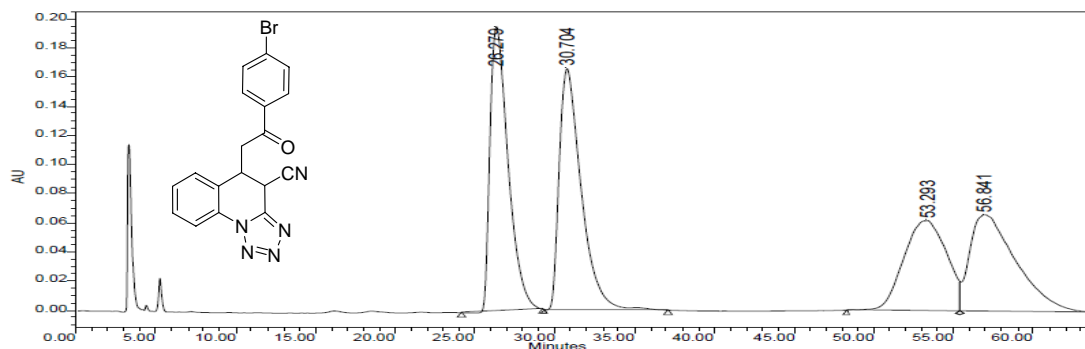

|   | RT (min) | Area (V*sec) | % Area | Height (V) | % Height |
|---|----------|--------------|--------|------------|----------|
| 1 | 26.279   | 15519000     | 27.52  | 195439     | 39.95    |
| 2 | 30.704   | 15867754     | 28.14  | 165505     | 33.83    |
| 3 | 53.293   | 11657246     | 20.68  | 61934      | 12.66    |
| 4 | 56.841   | 13339232     | 23.66  | 66383      | 13.57    |

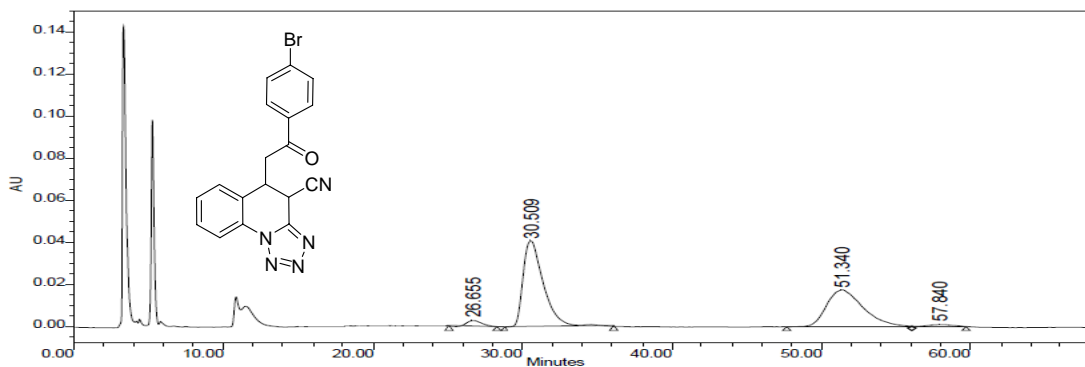

|   | RT (min) | Area (V*sec) | % Area | Height (V) | % Height |
|---|----------|--------------|--------|------------|----------|
| 1 | 26.655   | 201518       | 2.79   | 2808       | 4.52     |
| 2 | 30.509   | 3910673      | 54.08  | 40735      | 65.61    |
| 3 | 51.340   | 2998688      | 41.47  | 17573      | 28.30    |
| 4 | 57.840   | 120931       | 1.67   | 973        | 1.57     |

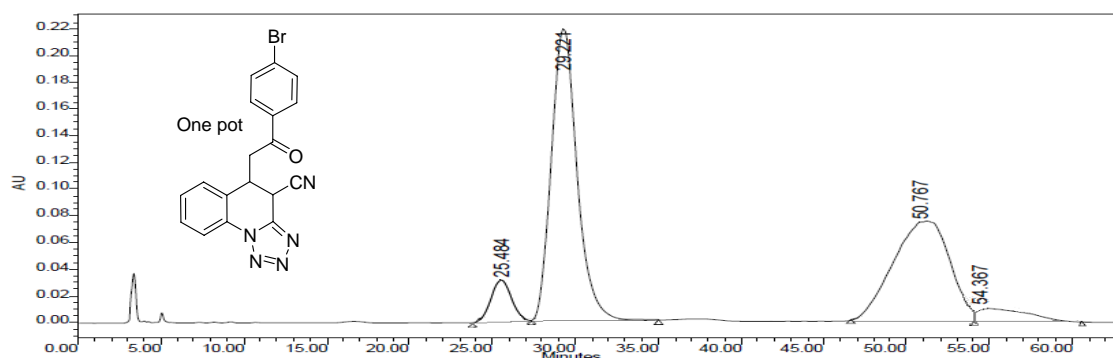

|   | RT (min) | Area (V*sec) | % Area | Height (V) | % Height |
|---|----------|--------------|--------|------------|----------|
| 1 | 25.484   | 2212527      | 5.49   | 28431      | 9.07     |
| 2 | 29.221   | 23290643     | 57.81  | 217374     | 69.31    |
| 3 | 50.767   | 13330552     | 33.09  | 61910      | 19.74    |
| 4 | 54.367   | 1453236      | 3.61   | 5895       | 1.88     |

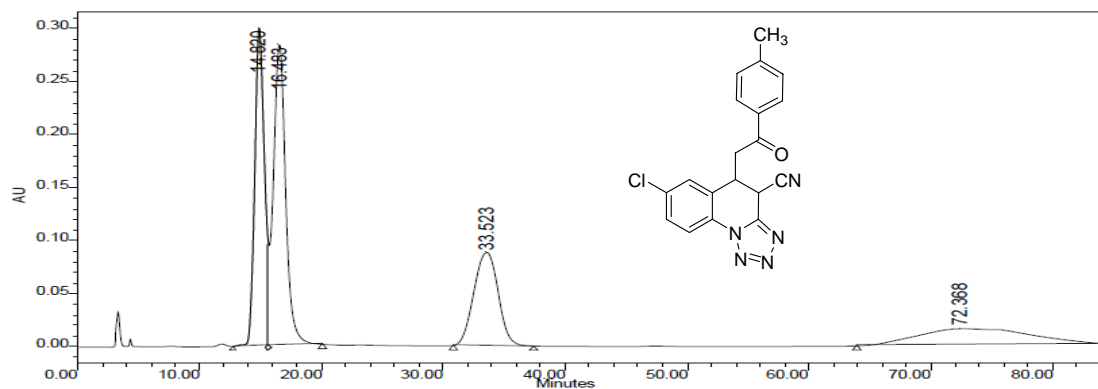

|   | RT (min) | Area (V*sec) | % Area | Height (V) | % Height |
|---|----------|--------------|--------|------------|----------|
| 1 | 14.820   | 16857963     | 28.63  | 299742     | 43.64    |
| 2 | 16.483   | 19825580     | 33.68  | 283639     | 41.30    |
| 3 | 33.523   | 12167148     | 20.67  | 87946      | 12.80    |
| 4 | 72.368   | 10022247     | 17.02  | 15483      | 2.25     |

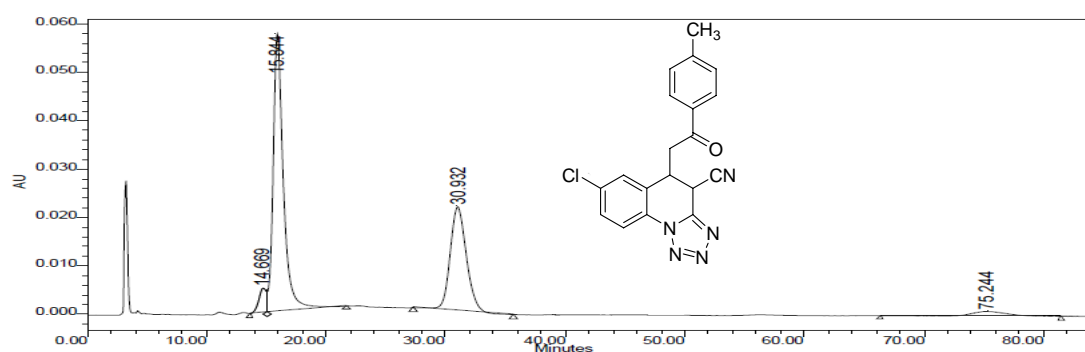

|   | RT (min) | Area (V*sec) | % Area | Height (V) | % Height |
|---|----------|--------------|--------|------------|----------|
| 1 | 14.669   | 239916       | 4.11   | 5058       | 5.96     |
| 2 | 15.844   | 3382820      | 57.90  | 57367      | 67.60    |
| 3 | 30.932   | 2039268      | 34.90  | 21523      | 25.36    |
| 4 | 75.244   | 180558       | 3.09   | 913        | 1.08     |

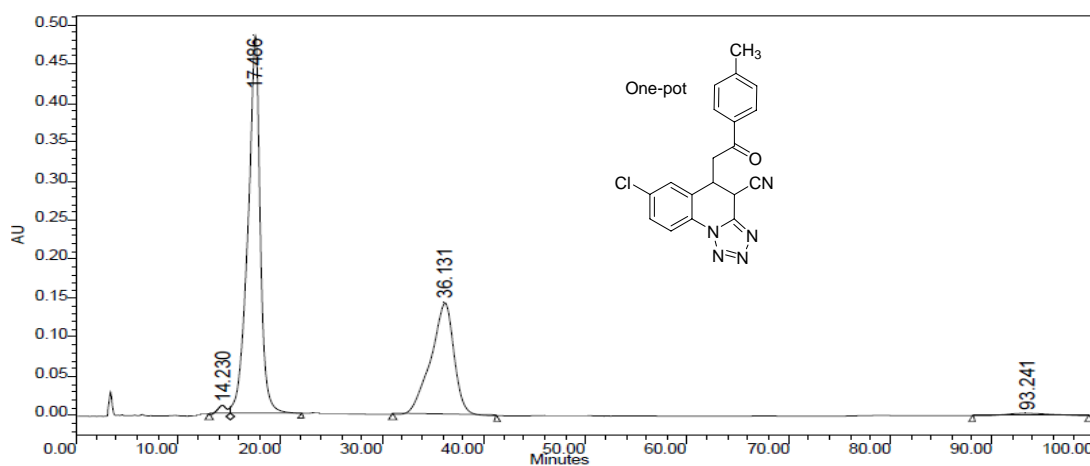

|   | RT (min) | Area (V*sec) | % Area | Height (V) | % Height |
|---|----------|--------------|--------|------------|----------|
| 1 | 14.230   | 834895       | 1.27   | 11986      | 1.86     |
| 2 | 17.486   | 40936269     | 62.38  | 484748     | 75.32    |
| 3 | 36.131   | 22835437     | 34.80  | 143717     | 22.33    |
| 4 | 93.241   | 1019424      | 1.55   | 3160       | 0.49     |

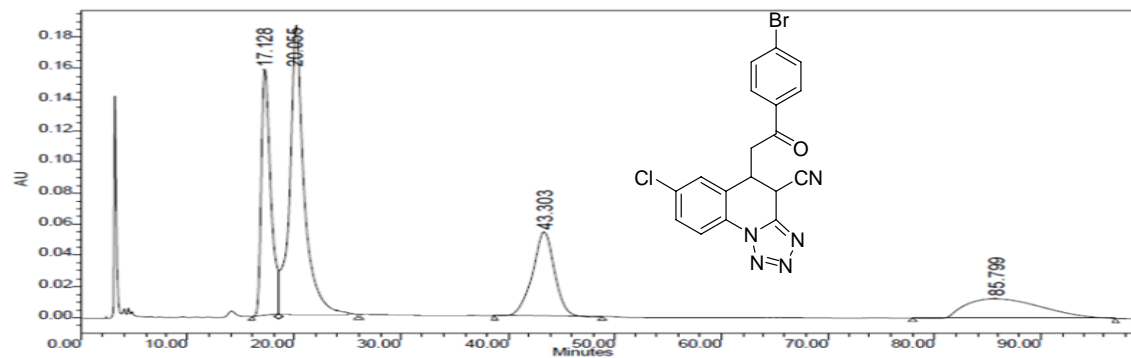

|   | RT (min) | Area (V*sec) | % Area | Height (V) | % Height |
|---|----------|--------------|--------|------------|----------|
| 1 | 17.128   | 7933201      | 26.03  | 146521     | 40.68    |
| 2 | 20.055   | 10211938     | 33.51  | 152156     | 42.24    |
| 3 | 43.303   | 6285076      | 20.62  | 49174      | 13.65    |
| 4 | 85.799   | 6044416      | 19.83  | 12363      | 3.43     |

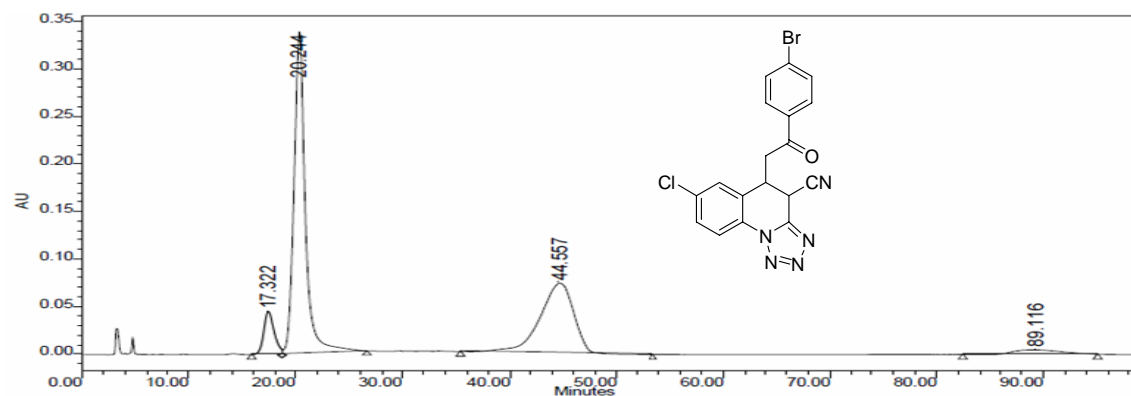

|   | RT (min) | Area (V*sec) | % Area | Height (V) | % Height |
|---|----------|--------------|--------|------------|----------|
| 1 | 17.322   | 2404673      | 5.42   | 40741      | 9.01     |
| 2 | 20.244   | 24358223     | 54.90  | 333210     | 73.65    |
| 3 | 44.557   | 15940245     | 35.93  | 73436      | 16.23    |
| 4 | 89.121   | 1664416      | 3.75   | 5025       | 1.11     |

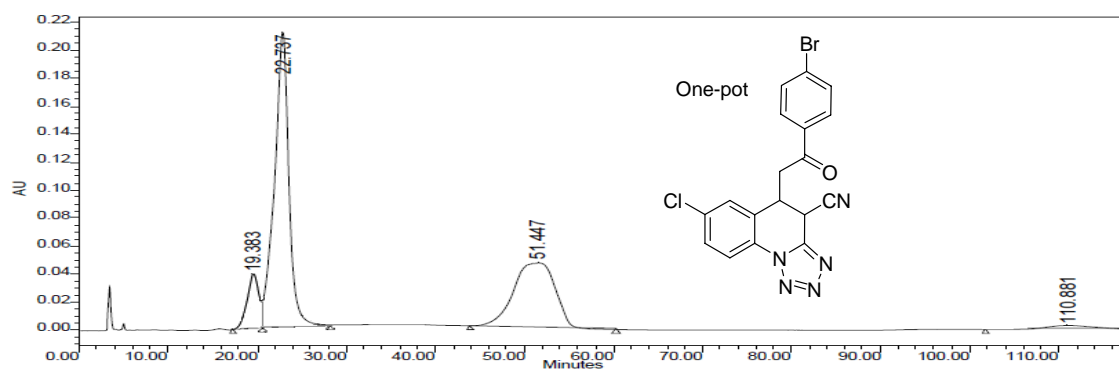

|   | RT (min) | Area (V*sec) | % Area | Height (V) | % Height |
|---|----------|--------------|--------|------------|----------|
| 1 | 19.383   | 1755945      | 4.70   | 25168      | 9.31     |
| 2 | 22.737   | 19649562     | 52.62  | 196345     | 72.61    |
| 3 | 51.447   | 14962939     | 40.07  | 46227      | 17.10    |
| 4 | 110.881  | 975455       | 2.61   | 2656       | 0.98     |

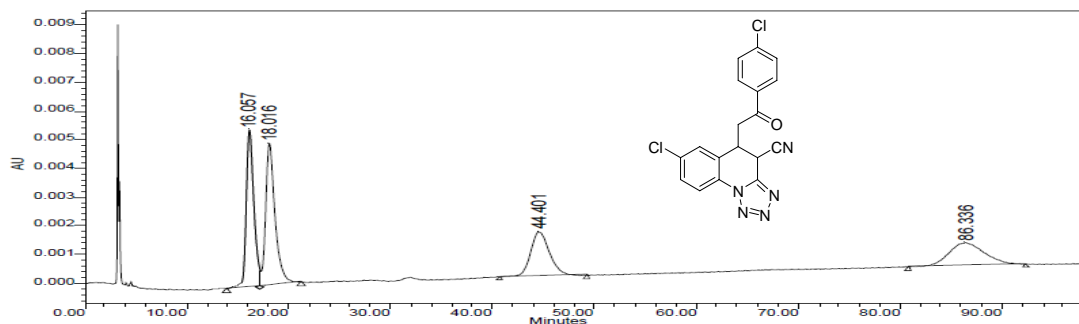

|   | RT (min) | Area (V*sec) | % Area | Height (V) | % Height |
|---|----------|--------------|--------|------------|----------|
| 1 | 16.057   | 296732       | 29.53  | 5474       | 42.87    |
| 2 | 18.016   | 315740       | 31.43  | 4947       | 38.75    |
| 3 | 44.401   | 200351       | 19.94  | 1549       | 12.13    |
| 4 | 86.336   | 191917       | 19.10  | 798        | 6.25     |

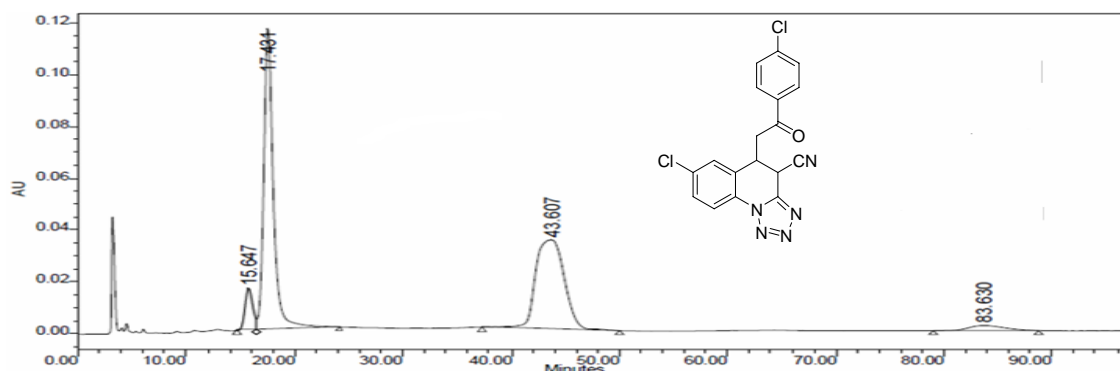

|   | RT (min) | Area (V*sec) | % Area | Height (V) | % Height |
|---|----------|--------------|--------|------------|----------|
| 1 | 15.647   | 704083       | 4.98   | 14914      | 9.01     |
| 2 | 17.431   | 6996464      | 49.48  | 114892     | 69.42    |
| 3 | 43.607   | 6071220      | 42.94  | 33889      | 20.48    |
| 4 | 83.630   | 368209       | 2.60   | 1796       | 1.09     |

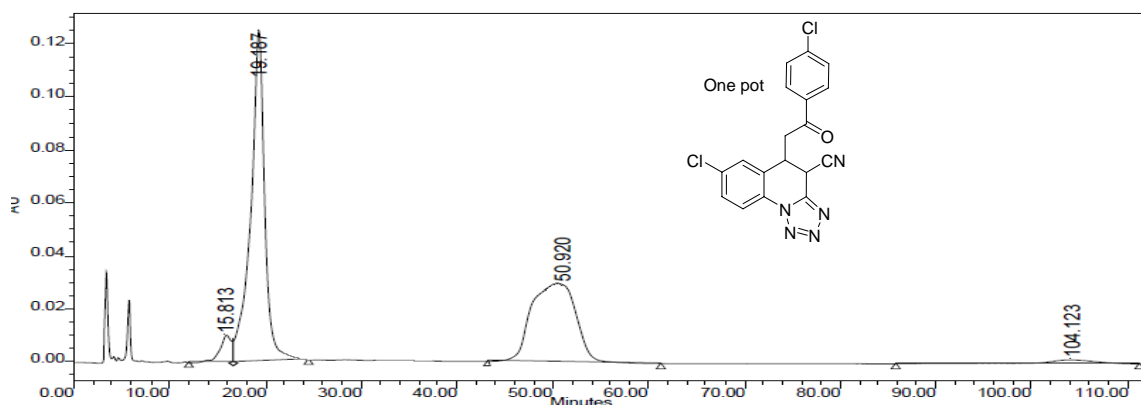

|   | RT (min) | Area (V*sec) | % Area | Height (V) | % Height |
|---|----------|--------------|--------|------------|----------|
| 1 | 15.813   | 934326       | 3.93   | 10127      | 6.12     |
| 2 | 19.187   | 12776650     | 53.76  | 124652     | 75.28    |
| 3 | 50.920   | 9365530      | 39.41  | 29228      | 17.65    |
| 4 | 104.123  | 689672       | 2.90   | 1573       | 0.95     |

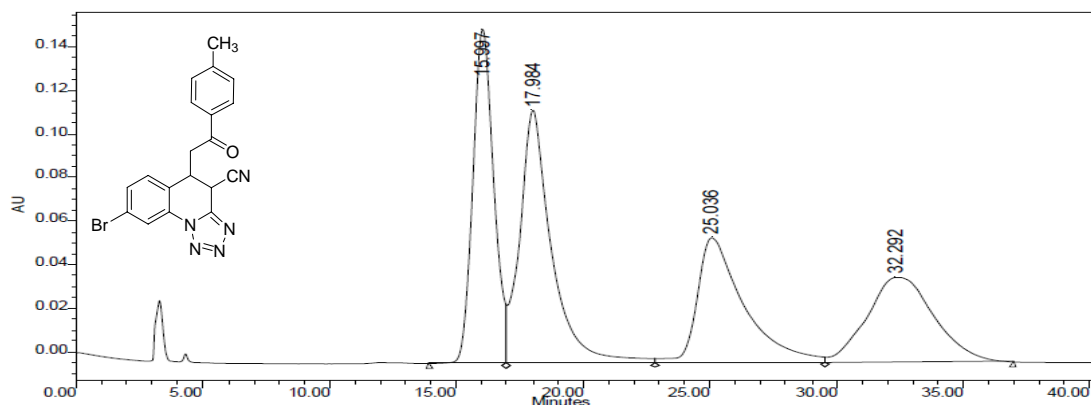

|   | RT (min) | Area (ÅV*sec) | % Area | Height (ÅV) | % Height |
|---|----------|---------------|--------|-------------|----------|
| 1 | 15.997   | 8822179       | 26.36  | 153344      | 41.90    |
| 2 | 17.984   | 10096367      | 30.17  | 116218      | 31.76    |
| 3 | 25.036   | 7355590       | 21.98  | 57430       | 15.69    |
| 4 | 32.292   | 7194103       | 21.50  | 38981       | 10.65    |

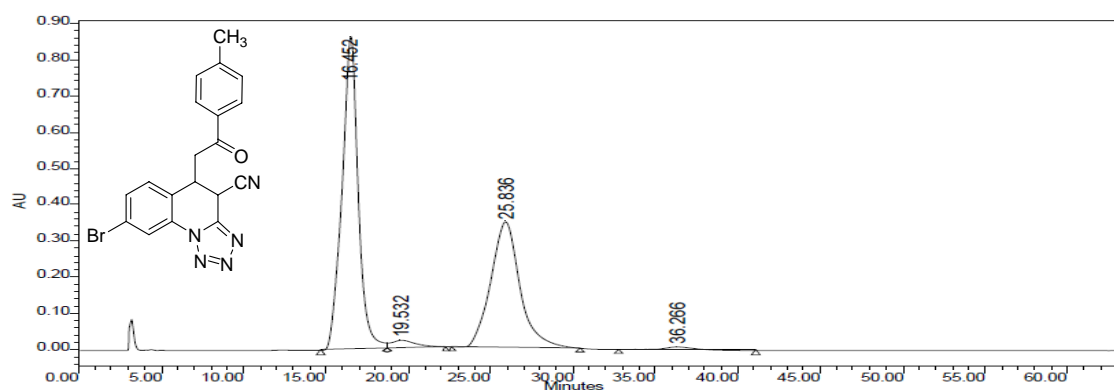

|   | RT (min) | Area (ÅV*sec) | % Area | Height (ÅV) | % Height |
|---|----------|---------------|--------|-------------|----------|
| 1 | 16.452   | 59295866      | 56.38  | 861616      | 69.64    |
| 2 | 19.532   | 2193760       | 2.09   | 21279       | 1.72     |
| 3 | 25.836   | 42695359      | 40.60  | 346694      | 28.02    |
| 4 | 36.266   | 978921        | 0.93   | 7651        | 0.62     |

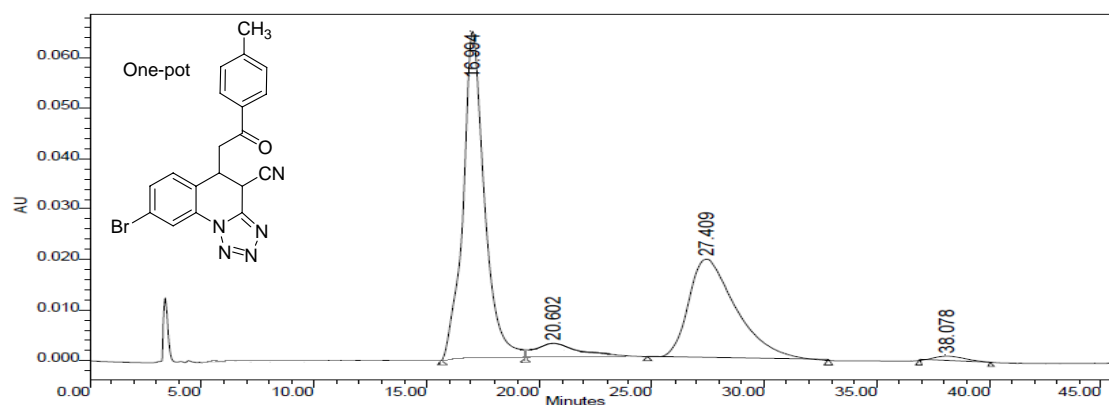

|   | RT (min) | Area (ÅV*sec) | % Area | Height (ÅV) | % Height |
|---|----------|---------------|--------|-------------|----------|
| 1 | 16.994   | 4182571       | 57.33  | 64686       | 74.55    |
| 2 | 20.602   | 123437        | 1.69   | 1485        | 1.71     |
| 3 | 27.409   | 2894381       | 39.67  | 19608       | 22.60    |
| 4 | 38.078   | 95405         | 1.31   | 989         | 1.14     |



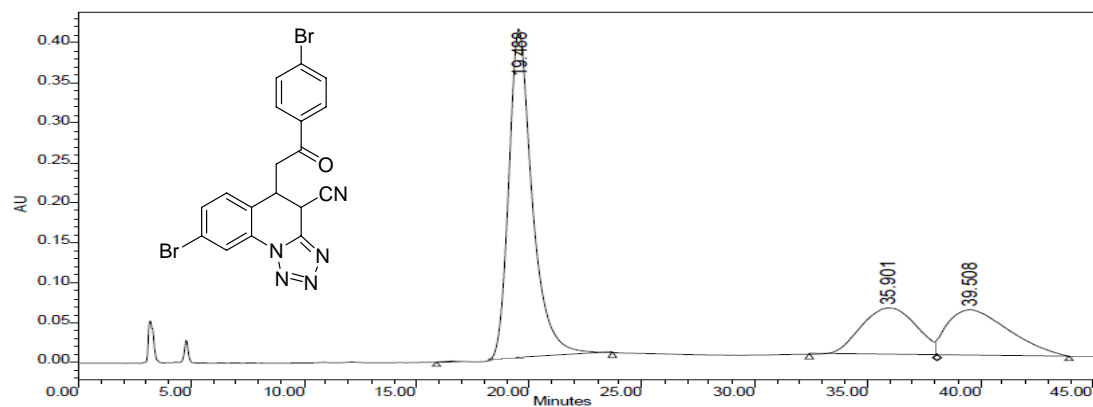

|   | RT (min) | Area (V*sec) | % Area | Height (V) | % Height |
|---|----------|--------------|--------|------------|----------|
| 1 | 19.488   | 29996885     | 58.80  | 411139     | 77.95    |
| 2 | 35.901   | 10143243     | 19.88  | 58721      | 11.13    |
| 3 | 39.508   | 10873053     | 21.31  | 57581      | 10.92    |

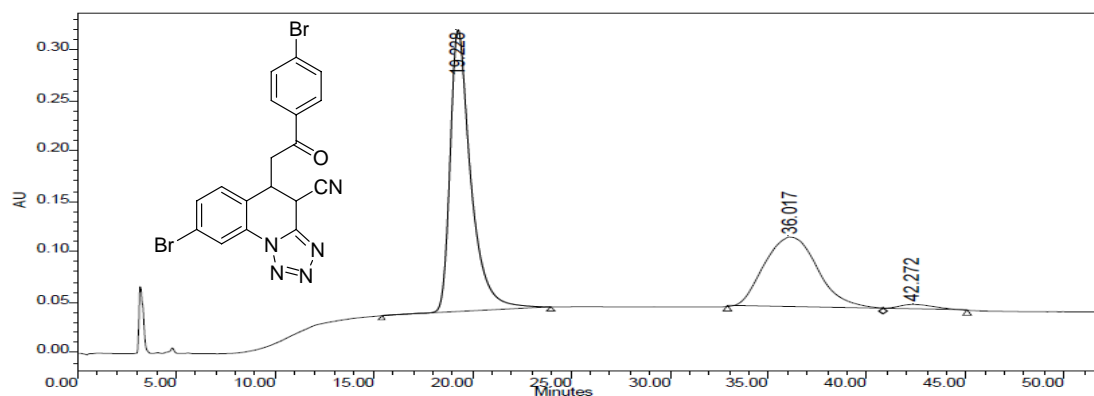

|   | RT (min) | Area (V*sec) | % Area | Height (V) | % Height |
|---|----------|--------------|--------|------------|----------|
| 1 | 19.228   | 20434903     | 59.48  | 279247     | 78.93    |
| 2 | 36.017   | 13261415     | 38.60  | 69664      | 19.69    |
| 3 | 42.272   | 658673       | 1.92   | 4894       | 1.38     |

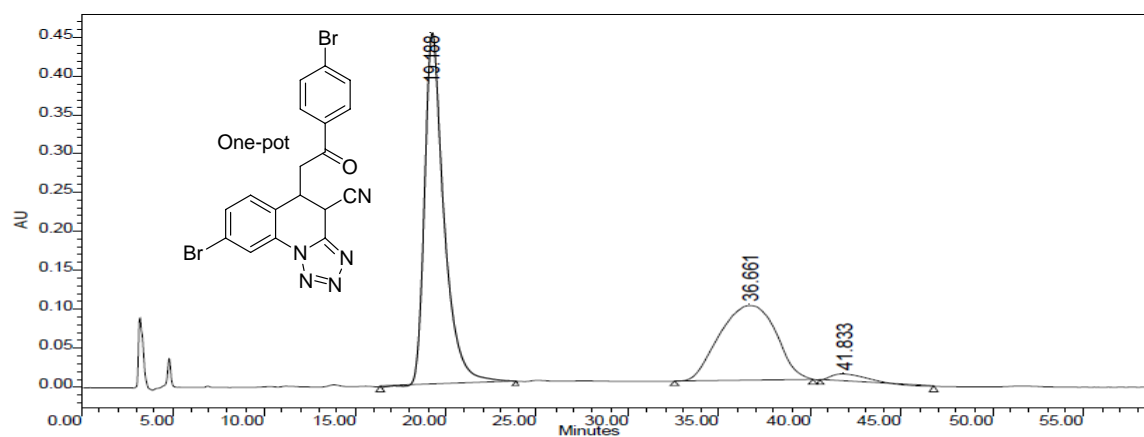

|   | RT (min) | Area (V*sec) | % Area | Height (V) | % Height |
|---|----------|--------------|--------|------------|----------|
| 1 | 19.188   | 33621925     | 60.37  | 452724     | 81.13    |
| 2 | 36.661   | 20805334     | 37.36  | 96147      | 17.23    |
| 3 | 41.833   | 1267856      | 2.28   | 9136       | 1.64     |

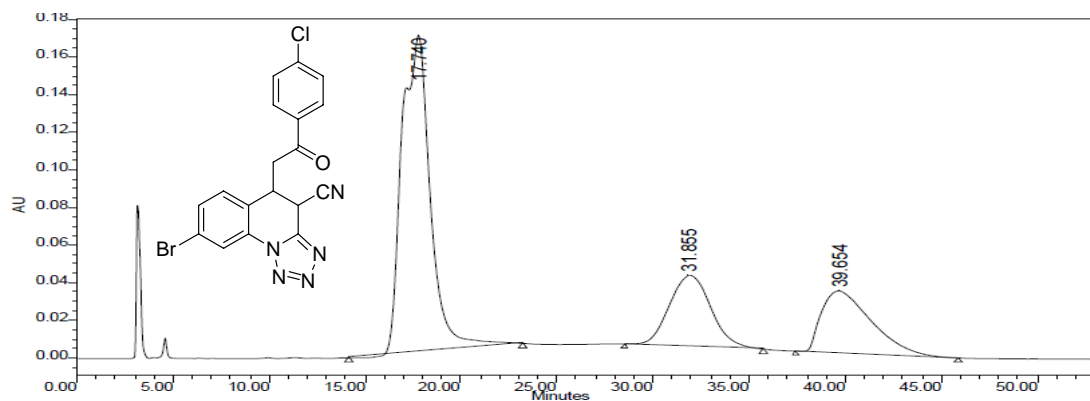

|   | RT (min) | Area (V*sec) | % Area | Height (V) | % Height |
|---|----------|--------------|--------|------------|----------|
| 1 | 17.740   | 17467454     | 60.00  | 168584     | 70.40    |
| 2 | 31.855   | 5680889      | 19.51  | 37814      | 15.79    |
| 3 | 39.654   | 5965830      | 20.49  | 33081      | 13.81    |

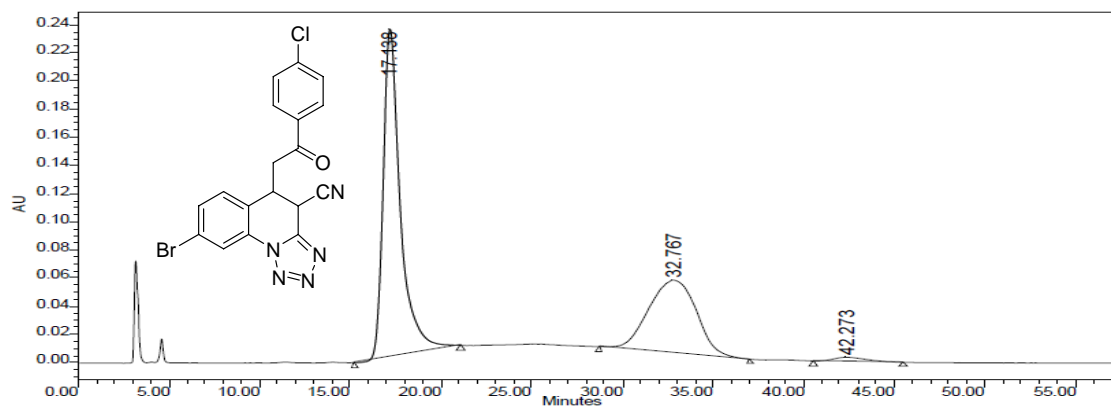

|   | RT (min) | Area (V*sec) | % Area | Height (V) | % Height |
|---|----------|--------------|--------|------------|----------|
| 1 | 17.138   | 15334133     | 61.05  | 233006     | 81.03    |
| 2 | 32.767   | 9411786      | 37.47  | 51584      | 17.94    |
| 3 | 42.273   | 372914       | 1.48   | 2960       | 1.03     |

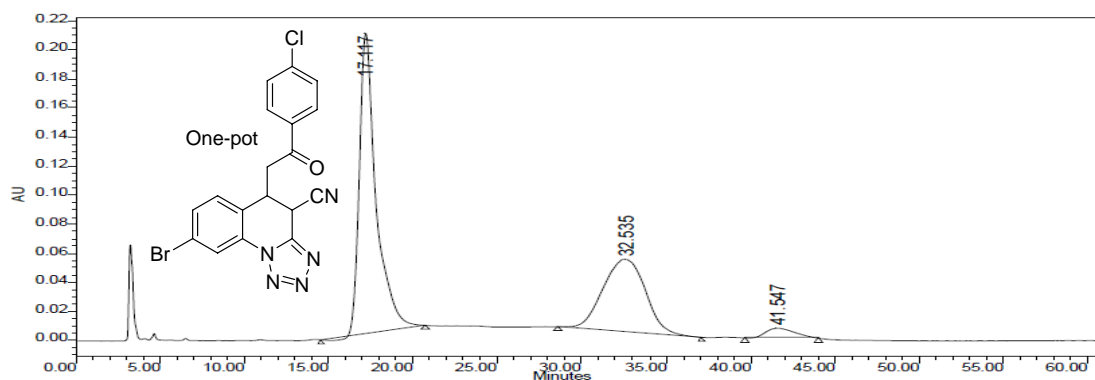

|   | RT (min) | Area (V*sec) | % Area | Height (V) | % Height |
|---|----------|--------------|--------|------------|----------|
| 1 | 17.117   | 14429822     | 60.23  | 206789     | 78.53    |
| 2 | 32.535   | 8711595      | 36.36  | 49776      | 18.90    |
| 3 | 41.547   | 817288       | 3.41   | 6769       | 2.57     |
